# Supplementary material for: Prolinamides containing 2-(2-aminocyclohexyl)phenols as highly enantioselective organocatalysts for aldol reactions
Source: Royal Society of Chemistry journal article supplement (doi:10.1039/d3ob00723e), 2023-01-01
Supplement: d3ob00723e1.pdf [file d3ob00723e1.pdf]

Supplementary Information for

## Prolinamides containing 2-(2-aminocyclohexyl)phenols as highly enantioselective organocatalysts for aldol reactions

Tolga A. Yeşil,<sup>a,b,c</sup> Taner Atalar,<sup>d</sup> Mustafa Yavuz,<sup>b</sup> Erkan Ertürk<sup>\*a</sup> 

<sup>a</sup> TÜBİTAK Marmara Research Center, 41470 Gebze, Kocaeli, Türkiye

<sup>b</sup> Department of Chemistry, Süleyman Demirel University, 32260 Isparta, Türkiye

<sup>c</sup> Present address: Sinop University, Türkeli Vocational School, Department of Property Protection and Security, 57900 Türkeli, Sinop, Türkiye

<sup>d</sup> TÜBİTAK SAGE, 06261 Mamak, Ankara, Türkiye

E-mail: [erkan.erturk@tubitak.gov.tr](mailto:erkan.erturk@tubitak.gov.tr)

### Table of Contents

| Page(s) | Content                                                                                          |
|---------|--------------------------------------------------------------------------------------------------|
| S1–S2   | Table of Contents                                                                                |
| S3      | Figure S1                                                                                        |
| S3–S22  | Calculations                                                                                     |
| S23     | Table S1                                                                                         |
| S24–S54 | NMR Spectra                                                                                      |
| S55–S61 | HPLC Chromatograms                                                                               |
| S24     | <sup>1</sup> H NMR Spectrum of ( <i>S</i> ,1 <i>R</i> ,2 <i>R</i> )- <b>27</b>                   |
| S25     | <sup>13</sup> C{ <sup>1</sup> H} NMR Spectrum of ( <i>S</i> ,1 <i>R</i> ,2 <i>R</i> )- <b>27</b> |
| S26     | <sup>1</sup> H NMR Spectrum of ( <i>S</i> ,1 <i>S</i> ,2 <i>S</i> )- <b>28</b>                   |
| S27     | <sup>13</sup> C{ <sup>1</sup> H} NMR Spectrum of ( <i>S</i> ,1 <i>S</i> ,2 <i>S</i> )- <b>28</b> |
| S28     | <sup>1</sup> H NMR Spectrum of ( <i>S</i> ,1 <i>R</i> ,2 <i>R</i> )- <b>29</b>                   |
| S29     | <sup>13</sup> C{ <sup>1</sup> H} NMR Spectrum of ( <i>S</i> ,1 <i>R</i> ,2 <i>R</i> )- <b>29</b> |
| S30     | <sup>1</sup> H NMR Spectrum of ( <i>S</i> ,1 <i>S</i> ,2 <i>S</i> )- <b>30</b>                   |
| S31     | <sup>13</sup> C{ <sup>1</sup> H} NMR Spectrum of ( <i>S</i> ,1 <i>S</i> ,2 <i>S</i> )- <b>30</b> |
| S32     | <sup>1</sup> H NMR Spectrum of ( <i>S</i> ,1 <i>S</i> ,2 <i>R</i> )- <b>31</b>                   |
| S33     | <sup>13</sup> C{ <sup>1</sup> H} NMR Spectrum of ( <i>S</i> ,1 <i>S</i> ,2 <i>R</i> )- <b>31</b> |
| S34     | HSQC NMR Spectrum of ( <i>S</i> ,1 <i>S</i> ,2 <i>R</i> )- <b>31</b>                             |

|            |                                                                                                      |
|------------|------------------------------------------------------------------------------------------------------|
| <b>S35</b> | <sup>1</sup> H NMR Spectrum of ( <i>S</i> ,1 <i>R</i> ,2 <i>S</i> )- <b>32</b>                       |
| <b>S36</b> | <sup>13</sup> C{ <sup>1</sup> H} NMR Spectrum of ( <i>S</i> ,1 <i>R</i> ,2 <i>S</i> )- <b>32</b>     |
| <b>S37</b> | HSQC NMR Spectrum of ( <i>S</i> ,1 <i>R</i> ,2 <i>S</i> )- <b>32</b>                                 |
| <b>S38</b> | <sup>1</sup> H NMR Spectrum of (±)- <b>35</b>                                                        |
| <b>S39</b> | <sup>13</sup> C{ <sup>1</sup> H} NMR Spectrum of (±)- <b>35</b>                                      |
| <b>S40</b> | <sup>1</sup> H NMR Spectrum of (±)- <b>36</b>                                                        |
| <b>S41</b> | <sup>13</sup> C{ <sup>1</sup> H} NMR Spectrum of (±)- <b>36</b>                                      |
| <b>S42</b> | <sup>1</sup> H NMR Spectrum of (±)- <b>37</b>                                                        |
| <b>S43</b> | <sup>13</sup> C{ <sup>1</sup> H} NMR Spectrum of (±)- <b>37</b>                                      |
| <b>S44</b> | HSQC NMR Spectrum of (±)- <b>37</b>                                                                  |
| <b>S45</b> | <sup>1</sup> H NMR Spectrum of (±)- <b>20</b>                                                        |
| <b>S46</b> | <sup>13</sup> C{ <sup>1</sup> H} NMR Spectrum of (±)- <b>20</b>                                      |
| <b>S47</b> | <sup>1</sup> H NMR Spectrum of (±)- <b>18</b>                                                        |
| <b>S48</b> | <sup>13</sup> C{ <sup>1</sup> H} NMR Spectrum of (±)- <b>18</b>                                      |
| <b>S49</b> | <sup>1</sup> H NMR Spectrum of ( <i>S</i> ,1 <i>S</i> ,2 <i>R</i> )- <b>43</b>                       |
| <b>S50</b> | <sup>13</sup> C{ <sup>1</sup> H} NMR Spectrum of ( <i>S</i> ,1 <i>S</i> ,2 <i>R</i> )- <b>43</b>     |
| <b>S51</b> | HSQC NMR Spectrum of ( <i>S</i> ,1 <i>S</i> ,2 <i>R</i> )- <b>43</b>                                 |
| <b>S52</b> | <sup>1</sup> H NMR Spectrum of ( <i>S</i> ,1 <i>R</i> ,2 <i>S</i> )- <b>44</b>                       |
| <b>S53</b> | <sup>13</sup> C{ <sup>1</sup> H} NMR Spectrum of ( <i>S</i> ,1 <i>R</i> ,2 <i>S</i> )- <b>44</b>     |
| <b>S54</b> | HSQC NMR Spectrum of ( <i>S</i> ,1 <i>R</i> ,2 <i>S</i> )- <b>44</b>                                 |
| <b>S55</b> | HPLC Chromatograms of (±)- <b>45a</b> , (±)- <b>46a</b> , and (2 <i>S</i> ,1' <i>R</i> )- <b>45a</b> |
| <b>S56</b> | HPLC Chromatograms of (±)- <b>45b</b> , (±)- <b>46b</b> , and (2 <i>S</i> ,1' <i>R</i> )- <b>45b</b> |
| <b>S57</b> | HPLC Chromatograms of (±)- <b>45d</b> , (±)- <b>46d</b> , and (2 <i>S</i> ,1' <i>R</i> )- <b>45d</b> |
| <b>S58</b> | HPLC Chromatograms of (±)- <b>7a</b> and ( <i>R</i> )- <b>7a</b>                                     |
| <b>S59</b> | HPLC Chromatograms of (±)- <b>7b</b> and ( <i>R</i> )- <b>7b</b>                                     |
| <b>S50</b> | HPLC Chromatograms of (±)- <b>7c</b> and ( <i>R</i> )- <b>7c</b>                                     |
| <b>S61</b> | HPLC Chromatograms of (±)- <b>48</b> and ( <i>S</i> )- <b>48</b>                                     |

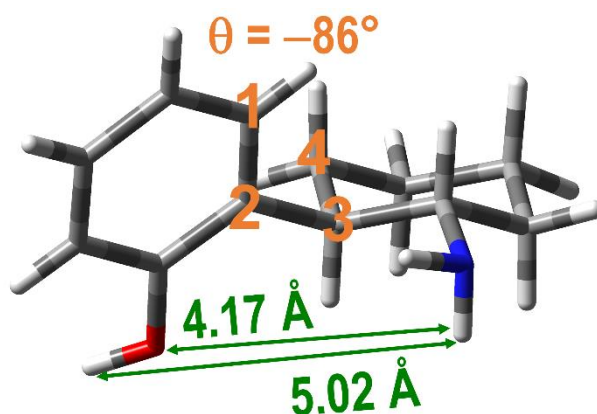

**Figure S1.** X-ray crystal structure of 2-((1R,2S)-2-aminocyclohexyl)phenol ((1R,2S)-**18**). CCDC1848757.  $\theta$ : The C1—C2—C3—C4 dihedral angle.

### Calculations:

Transition state geometries for the aldol reactions and geometry optimizations were performed using the Gaussian 16 Program. Structures of (*S*,1*S*,2*R*)-**31** and (*S*,1*R*,2*S*)-**32** geometries were optimized by the B3LYP with the 6-311+G(d,p) basis set. Frequency calculations of the transition structures **TS1**, **TS2**, **TS3** and **TS4** were performed at B3LYP with 6-31 G(d,p) basis set.

The resulting Z-matrix for the considered structures (*S*,1*S*,2*R*)-**31**, (*S*,1*R*,2*S*)-**32**, **TS1**, **TS2**, **TS3** and **TS4**, as well as the corresponding computed energies are the follows:

#### Structure of (*S*,1*S*,2*R*)-**31**

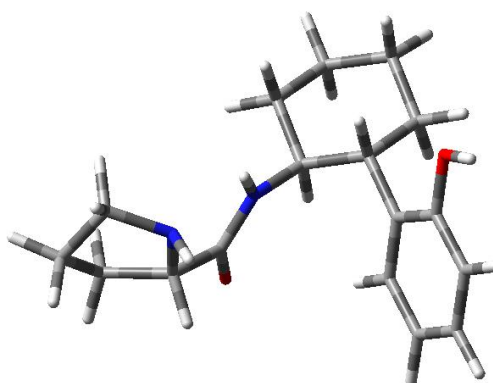

|                                           |             |
|-------------------------------------------|-------------|
| Electronic Energy (a.u)                   | -922.498683 |
| EE + Zero-point Energy (a.u)              | -922.106881 |
| EE + Thermal Energy Correction (a.u)      | -922.087433 |
| EE + Thermal Enthalpy Correction (a.u)    | -922.086489 |
| EE + Thermal Free Energy Correction (a.u) | -922.157346 |

|   |            |            |             |
|---|------------|------------|-------------|
| C | 0.11647300 | 2.83612800 | 0.06269800  |
| C | 1.32929600 | 3.70339000 | -0.29522400 |
| C | 2.61566300 | 3.13415000 | 0.31360100  |
| C | 2.81657300 | 1.66702200 | -0.08335700 |
| C | 1.59752500 | 0.78443500 | 0.28416000  |
| C | 0.31317900 | 1.36532900 | -0.35072200 |
| H | 3.48124600 | 3.72695700 | -0.00003400 |

|   |             |             |             |
|---|-------------|-------------|-------------|
| H | 1.43222500  | 3.74744800  | -1.38695600 |
| H | 1.16578700  | 4.73177400  | 0.04282000  |
| H | -0.05996900 | 2.87940400  | 1.14589300  |
| H | -0.78756900 | 3.21724800  | -0.42124000 |
| H | 2.98635400  | 1.59651500  | -1.16523200 |
| H | 3.70810400  | 1.26018300  | 0.40124000  |
| H | 1.47494600  | 0.84503800  | 1.37239100  |
| H | 0.38507200  | 1.32703100  | -1.44055700 |
| H | 2.56540600  | 3.20950100  | 1.40750500  |
| H | -1.06908200 | 0.34043300  | 0.96069900  |
| C | -1.71918600 | 0.05799700  | -0.91260600 |
| O | -1.62183600 | 0.19774900  | -2.12818600 |
| N | -0.85899600 | 0.57150400  | -0.00506800 |
| C | -2.88036300 | -0.74865400 | -0.31608800 |
| C | -4.25241700 | -0.11205300 | -0.66739600 |
| H | -2.80746500 | -1.74218200 | -0.77032200 |
| C | -4.12599100 | -0.34544100 | 1.70414300  |
| C | -5.12882500 | -0.44756000 | 0.54684300  |
| H | -4.64164100 | -0.48858700 | -1.61278100 |
| H | -4.14462300 | 0.97194600  | -0.76932700 |
| H | -4.41493400 | -0.90984100 | 2.59339100  |
| H | -4.00440700 | 0.70146400  | 2.00572200  |
| H | -5.51489800 | -1.47009400 | 0.47139700  |
| H | -5.98174100 | 0.22673500  | 0.65629600  |
| N | -2.84465500 | -0.85377600 | 1.16449600  |
| H | -2.70143500 | -1.81607700 | 1.44223600  |
| C | 1.87069800  | -0.67117900 | -0.05905400 |
| C | 2.53961200  | -1.48698500 | 0.86905300  |
| C | 1.53008600  | -1.24503300 | -1.28738000 |
| C | 2.84672600  | -2.81613700 | 0.57915300  |
| C | 1.83463200  | -2.57202500 | -1.59086800 |
| H | 0.99535400  | -0.65391300 | -2.02133100 |
| C | 2.49508600  | -3.36020200 | -0.65354000 |
| H | 3.36367900  | -3.42218200 | 1.31851700  |
| H | 1.55064800  | -2.98370800 | -2.55215100 |
| H | 2.73775700  | -4.39362900 | -0.87381100 |
| O | 2.88438400  | -0.92263600 | 2.07716900  |
| H | 3.31375100  | -1.58556400 | 2.62729200  |

1 2 1.0 6 1.0 10 1.0 11 1.0

2 3 1.0 8 1.0 9 1.0

3 4 1.0 7 1.0 16 1.0

4 5 1.0 12 1.0 13 1.0

5 6 1.0 14 1.0 34 1.0

6 15 1.0 20 1.0

7

8

9  
10  
11  
12  
13  
14  
15  
16  
17 20 1.0  
18 19 2.0 20 1.5 21 1.0  
19  
20  
21 22 1.0 23 1.0 32 1.0  
22 25 1.0 26 1.0 27 1.0  
23  
24 25 1.0 28 1.0 29 1.0 32 1.0  
25 30 1.0 31 1.0  
26  
27  
28  
29  
30  
31  
32 33 1.0  
33  
34 35 1.5 36 1.5  
35 37 1.5 44 1.0  
36 38 1.5 39 1.0  
37 40 1.5 41 1.0  
38 40 1.5 42 1.0  
39  
40 43 1.0  
41  
42  
43  
44 45 1.0  
45

## Structure of (S,1R,2S)-32

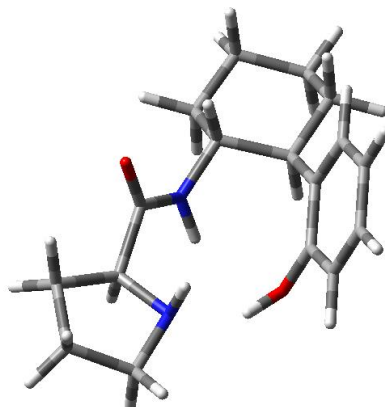

|                                           |             |
|-------------------------------------------|-------------|
| Electronic Energy (a.u)                   | -922.496598 |
| EE + Zero-point Energy (a.u)              | -922.103749 |
| EE + Thermal Energy Correction (a.u)      | -922.084848 |
| EE + Thermal Enthalpy Correction (a.u)    | -922.083904 |
| EE + Thermal Free Energy Correction (a.u) | -922.151833 |

|   |             |             |             |
|---|-------------|-------------|-------------|
| C | -2.20696800 | -2.47863300 | -0.12171400 |
| C | -3.70767000 | -2.34732700 | 0.15224800  |
| C | -4.28553500 | -1.12963900 | -0.57526500 |
| C | -3.53795700 | 0.14481100  | -0.16955100 |
| C | -2.02310100 | 0.06140600  | -0.45496300 |
| C | -1.41329700 | -1.20360400 | 0.22365700  |
| H | -5.35167300 | -1.01990300 | -0.35217600 |
| H | -3.87824800 | -2.24069100 | 1.23119200  |
| H | -4.22232100 | -3.26336100 | -0.15465100 |
| H | -2.05445000 | -2.70165800 | -1.18611100 |
| H | -1.77736100 | -3.31523500 | 0.43714500  |
| H | -3.70907900 | 0.31006100  | 0.89995200  |
| H | -3.94933300 | 1.01593600  | -0.68839900 |
| H | -1.90589600 | -0.07933300 | -1.53666400 |
| H | -1.39611400 | -1.06112400 | 1.30746700  |
| H | -4.20612600 | -1.27813900 | -1.65988400 |
| H | 0.15186300  | -1.20869400 | -1.17574500 |
| C | 1.05777300  | -1.35729900 | 0.62395900  |
| O | 1.00504900  | -1.36290800 | 1.84534000  |
| N | -0.02340000 | -1.38128700 | -0.19570700 |
| C | 2.39468200  | -1.29133300 | -0.14136600 |
| C | 3.62313900  | -1.78295600 | 0.65129400  |
| C | 4.13811100  | 0.11240300  | -0.81719200 |
| C | 4.77962300  | -0.83994200 | 0.21937600  |
| H | 3.41337400  | -1.70103700 | 1.71855700  |
| H | 3.83689800  | -2.83168700 | 0.43518800  |
| H | 4.53056400  | 1.13036400  | -0.78303000 |
| H | 4.28409300  | -0.26579600 | -1.83387700 |

|   |             |             |             |
|---|-------------|-------------|-------------|
| H | 5.15350000  | -0.27477700 | 1.07667800  |
| H | 5.62761600  | -1.38283000 | -0.20360000 |
| N | 2.68636300  | 0.11688800  | -0.53604400 |
| H | 2.52443300  | 0.70234500  | 0.28382400  |
| C | -1.27842300 | 1.34305600  | -0.08874400 |
| C | -0.14162600 | 1.75521400  | -0.80998000 |
| C | -1.68588200 | 2.15340700  | 0.97901300  |
| C | 0.52639600  | 2.93811100  | -0.47908500 |
| C | -1.01213500 | 3.32181800  | 1.32629700  |
| H | -2.54969700 | 1.86548500  | 1.56488300  |
| C | 0.09950900  | 3.71949400  | 0.58942800  |
| H | 1.37832400  | 3.23751700  | -1.08010700 |
| H | -1.35860100 | 3.91665600  | 2.16348300  |
| H | 0.62769700  | 4.63346800  | 0.83741800  |
| O | 0.32693600  | 0.99002800  | -1.85657300 |
| H | 1.27510300  | 0.79510400  | -1.66234600 |
| H | 2.29898700  | -1.86276100 | -1.07155200 |

1 2 1.0 6 1.0 10 1.0 11 1.0

2 3 1.0 8 1.0 9 1.0

3 4 1.0 7 1.0 16 1.0

4 5 1.0 12 1.0 13 1.0

5 6 1.0 14 1.0 33 1.0

6 15 1.0 20 1.0

7

8

9

10

11

12

13

14

15

16

17 20 1.0

18 19 2.0 20 1.5 21 1.0

19

20

21 22 1.0 31 1.0 45 1.0

22 24 1.0 25 1.0 26 1.0

23 24 1.0 27 1.0 28 1.0 31 1.0

24 29 1.0 30 1.0

25

26

27

28

29

30  
 31 32 1.0  
 32  
 33 34 1.5 35 1.5  
 34 36 1.5 43 1.0  
 35 37 1.5 38 1.0  
 36 39 1.5 40 1.0  
 37 39 1.5 41 1.0  
 38  
 39 42 1.0  
 40  
 41  
 42  
 43 44 1.0  
 44  
 45

**Structure of TS1**

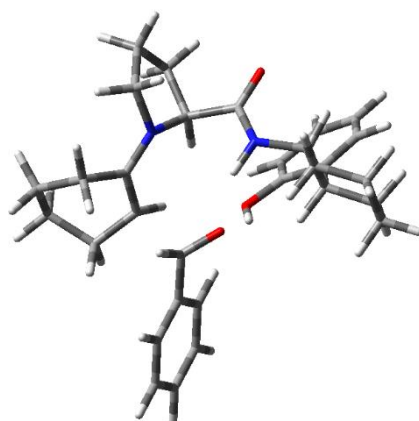

|                                           |              |
|-------------------------------------------|--------------|
| Electronic Energy (a.u)                   | -1501.273887 |
| EE + Zero-point Energy (a.u)              | -1500.644190 |
| EE + Thermal Energy Correction (a.u)      | -1500.614712 |
| EE + Thermal Enthalpy Correction (a.u)    | -1500.613768 |
| EE + Thermal Free Energy Correction (a.u) | -1500.702996 |

C      -2.64062300   -0.18945100   -2.94016200  
 C      -3.75002500   -1.17274700   -3.32371900  
 C      -3.64911500   -2.45146000   -2.48300700  
 C      -3.75862700   -2.12171300   -0.99117100  
 C      -2.67740900   -1.12017400   -0.54058600  
 C      -2.68478000   0.15860900   -1.43824400  
 H      -4.44502900   -3.16251500   -2.77161300  
 H      -4.74201900   -0.70238800   -3.18154700  
 H      -3.67891600   -1.41699800   -4.39998300  
 H      -1.65433400   -0.62668200   -3.19876100



|   |             |             |             |
|---|-------------|-------------|-------------|
| H | -2.72788000 | 0.73946900  | -3.53478200 |
| H | -4.76708700 | -1.71498800 | -0.77699500 |
| H | -3.67025200 | -3.04545700 | -0.38776100 |
| H | -1.67090500 | -1.61682100 | -0.66391500 |
| H | -3.58954700 | 0.77695600  | -1.20531000 |
| H | -2.68981400 | -2.96494500 | -2.68906700 |
| H | -0.56435800 | 0.48018800  | -1.38270000 |
| C | -1.46614000 | 1.91924800  | -0.14597200 |
| O | -2.47645000 | 2.49843200  | 0.21965600  |
| N | -1.45870600 | 0.95927000  | -1.14287100 |
| C | -0.09136100 | 2.24953100  | 0.50603700  |
| C | -0.15987900 | 3.64082800  | 1.17045700  |
| H | 0.13345600  | 1.41972400  | 1.23470500  |
| C | 0.89059200  | 3.78975000  | -1.05799400 |
| C | 0.33057900  | 4.63911200  | 0.10248000  |
| H | 0.46456000  | 3.67592200  | 2.07765000  |
| H | -1.20019700 | 3.86836200  | 1.49067300  |
| H | 1.86307000  | 4.16935900  | -1.43073500 |
| H | 0.18332500  | 3.76449600  | -1.91748200 |
| H | 1.09632200  | 5.31655200  | 0.51402100  |
| H | -0.50208200 | 5.27619700  | -0.24756600 |
| N | 0.99859600  | 2.39749000  | -0.50847200 |
| C | -2.86216900 | -0.75123800 | 0.91246900  |
| C | -1.76030200 | -0.66657000 | 1.79376900  |
| C | -4.12764200 | -0.46383000 | 1.44100800  |
| C | -1.91724200 | -0.35568700 | 3.15760700  |
| C | -4.30056100 | -0.14573100 | 2.79066600  |
| H | -4.99743200 | -0.48499000 | 0.78207400  |
| C | -3.19493000 | -0.09851000 | 3.64751800  |
| H | -1.04173900 | -0.32044700 | 3.79807000  |
| H | -5.29353400 | 0.07370500  | 3.17216800  |
| H | -3.33236400 | 0.14555600  | 4.69964600  |
| O | -0.46801500 | -0.84114200 | 1.40088400  |
| C | 2.16285600  | 1.68303700  | -0.48326900 |
| C | 2.35135600  | 0.48475600  | 0.23387300  |
| H | 1.63569100  | 0.22524500  | 1.02585400  |
| C | 3.79935400  | 0.17223300  | 0.55478300  |
| H | 4.27687700  | -0.41430900 | -0.25526200 |
| H | 3.84841200  | -0.46725000 | 1.45813400  |
| C | 4.60697400  | 1.46305600  | 0.77506300  |
| H | 5.65274600  | 1.21422200  | 1.03245600  |
| H | 4.19995100  | 2.00363900  | 1.65142200  |
| C | 4.57229400  | 2.37319000  | -0.46292400 |
| H | 5.47262800  | 2.20099400  | -1.08375100 |
| H | 4.61948200  | 3.43157500  | -0.14375100 |
| H | -0.36640500 | -1.12610400 | 0.38282100  |
| C | 3.32051800  | 2.15228800  | -1.33640000 |

|   |            |             |             |
|---|------------|-------------|-------------|
| H | 3.10100800 | 3.07264700  | -1.91454300 |
| H | 3.53131800 | 1.36947000  | -2.09883600 |
| O | 0.50060200 | -0.90874200 | -0.95508400 |
| C | 1.76096600 | -1.00229100 | -0.95108600 |
| H | 2.29868400 | -0.61557800 | -1.83227800 |
| C | 2.52300800 | -3.81630300 | 1.51604900  |
| C | 1.94358200 | -2.67456100 | 0.95387400  |
| C | 2.39042400 | -2.19783700 | -0.28423200 |
| C | 3.42131500 | -2.87268300 | -0.95821700 |
| C | 3.99593500 | -4.01474000 | -0.39575300 |
| C | 3.54823700 | -4.48709800 | 0.84324200  |
| H | 2.16940000 | -4.18332800 | 2.47839900  |
| H | 1.13732800 | -2.15321300 | 1.48446200  |
| H | 3.77098400 | -2.51554100 | -1.92523500 |
| H | 4.79064900 | -4.53915400 | -0.92242400 |
| H | 3.99654300 | -5.37737900 | 1.28053400  |

1 2 1.0 6 1.0 10 1.0 11 1.0

2 3 1.0 8 1.0 9 1.0

3 4 1.0 7 1.0 16 1.0

4 5 1.0 12 1.0 13 1.0

5 6 1.0 14 1.0 33 1.0

6 15 1.0 20 1.0

7

8

9

10

11

12

13

14

15

16

17 20 1.0

18 19 2.0 20 1.0 21 1.0

19

20

21 22 1.0 23 1.0 32 1.0

22 25 1.0 26 1.0 27 1.0

23

24 25 1.0 28 1.0 29 1.0 32 1.0

25 30 1.0 31 1.0

26

27

28

29

30

31  
32 44 1.5  
33 34 1.5 35 1.5  
34 36 1.5 43 1.0  
35 37 1.5 38 1.0  
36 39 1.5 40 1.0  
37 39 1.5 41 1.0  
38  
39 42 1.0  
40  
41  
42  
43  
44 45 1.5 57 1.0  
45 46 1.0 47 1.0  
46  
47 48 1.0 49 1.0 50 1.0  
48  
49  
50 51 1.0 52 1.0 53 1.0  
51  
52  
53 54 1.0 55 1.0 57 1.0  
54  
55  
56  
57 58 1.0 59 1.0  
58  
59  
60 61 2.0  
61 62 1.0 65 1.0  
62  
63 64 1.5 68 1.5 69 1.0  
64 65 1.5 70 1.0  
65 66 1.5  
66 67 1.5 71 1.0  
67 68 1.5 72 1.0  
68 73 1.0  
69  
70  
71  
72  
73

## Structure of TS2

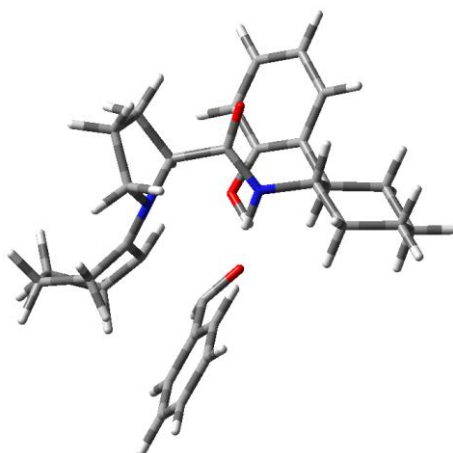

|                                           |              |
|-------------------------------------------|--------------|
| Electronic Energy (a.u)                   | -1501.274542 |
| EE + Zero-point Energy (a.u)              | -1500.644540 |
| EE + Thermal Energy Correction (a.u)      | -1500.615165 |
| EE + Thermal Enthalpy Correction (a.u)    | -1500.614221 |
| EE + Thermal Free Energy Correction (a.u) | -1500.703009 |

|   |             |             |             |
|---|-------------|-------------|-------------|
| C | -1.85810400 | 2.76663600  | 1.36726100  |
| C | -3.00329700 | 3.75723600  | 1.13521200  |
| C | -3.48362500 | 3.69791400  | -0.32050400 |
| C | -3.94383800 | 2.28153000  | -0.68129500 |
| C | -2.82771700 | 1.24325600  | -0.45510500 |
| C | -2.28131300 | 1.32857000  | 1.00607900  |
| H | -4.31053200 | 4.41456700  | -0.47862700 |
| H | -3.84346900 | 3.53470000  | 1.82082100  |
| H | -2.66858700 | 4.78156100  | 1.38391100  |
| H | -0.97978200 | 3.06688600  | 0.75922300  |
| H | -1.52804900 | 2.80045600  | 2.42235100  |
| H | -4.83688500 | 2.01829500  | -0.08108500 |
| H | -4.26770700 | 2.24233300  | -1.73891400 |
| H | -1.97520600 | 1.49185800  | -1.15248200 |
| H | -3.05715100 | 0.95675300  | 1.72363300  |
| H | -2.66840700 | 4.01565000  | -0.99948900 |
| H | -0.28071600 | 0.75744000  | 0.48355300  |
| C | -1.18438300 | -0.86212200 | 1.47964500  |
| O | -2.08915600 | -1.28550600 | 2.18105600  |
| N | -1.06529000 | 0.46780000  | 1.11411000  |
| C | -0.08831300 | -1.82618500 | 0.94016600  |
| C | -0.11500400 | -3.14265300 | 1.74606900  |
| H | -0.30007700 | -1.98161100 | -0.15602100 |
| C | 1.68616200  | -1.66681200 | 2.55922700  |
| C | 0.92214200  | -2.96936800 | 2.87304900  |
| H | 0.12454400  | -4.00375800 | 1.10158800  |
| H | -1.13177500 | -3.32611500 | 2.15772600  |
| H | 2.78411400  | -1.78002700 | 2.67412200  |

|   |             |             |             |
|---|-------------|-------------|-------------|
| H | 1.36024400  | -0.83639300 | 3.22504500  |
| H | 1.60195100  | -3.83538900 | 2.92411200  |
| H | 0.42155500  | -2.90060300 | 3.85625900  |
| N | 1.29931100  | -1.30616900 | 1.15527100  |
| C | -3.31745900 | -0.15078300 | -0.76469300 |
| C | -2.54799300 | -1.04364700 | -1.54511100 |
| C | -4.54694200 | -0.61765000 | -0.28090500 |
| C | -3.00529200 | -2.33594800 | -1.86683300 |
| C | -5.01182300 | -1.89975300 | -0.58517300 |
| H | -5.15215000 | 0.03323700  | 0.35222100  |
| C | -4.24220900 | -2.75372800 | -1.38362100 |
| H | -2.38700600 | -2.97705500 | -2.48750400 |
| H | -5.96808500 | -2.23565600 | -0.19466500 |
| H | -4.60902100 | -3.75020700 | -1.62445900 |
| O | -1.30465300 | -0.75636700 | -2.02135500 |
| C | 2.20298300  | -1.14745100 | 0.13918500  |
| C | 1.83457100  | -0.96804500 | -1.20969900 |
| H | 0.81969100  | -1.27375600 | -1.51603600 |
| C | 2.91398100  | -1.31519300 | -2.21462500 |
| H | 3.56370600  | -0.44252700 | -2.42613500 |
| H | 2.44741200  | -1.59502600 | -3.17943700 |
| C | 3.78716400  | -2.47296300 | -1.70095600 |
| H | 4.55787100  | -2.72682900 | -2.45163100 |
| H | 3.16081500  | -3.37988200 | -1.59194900 |
| C | 4.45439900  | -2.13620500 | -0.35816000 |
| H | 5.47826100  | -1.75203000 | -0.53304100 |
| H | 4.57364500  | -3.06325100 | 0.23438400  |
| H | -0.98430000 | 0.21755100  | -1.79371800 |
| C | 3.67554100  | -1.09354200 | 0.46844700  |
| H | 3.89240500  | -1.23503600 | 1.54740500  |
| H | 4.05379000  | -0.07101700 | 0.22850000  |
| O | 0.25320600  | 1.09605400  | -1.16154100 |
| C | 1.44709100  | 0.94676700  | -1.55206800 |
| H | 1.62199800  | 0.82730200  | -2.63450900 |
| C | 4.47925400  | 3.11249200  | 0.60865900  |
| C | 3.24640100  | 2.84156900  | 1.21320500  |
| C | 2.26843500  | 2.12983200  | 0.51586100  |
| C | 2.51913600  | 1.67985500  | -0.78940300 |
| C | 3.75077100  | 1.96228300  | -1.39605600 |
| C | 4.72934400  | 2.67455900  | -0.69545000 |
| H | 5.24005000  | 3.67169200  | 1.15080500  |
| H | 3.04595200  | 3.19444400  | 2.22344600  |
| H | 1.29500400  | 1.92585700  | 0.97131400  |
| H | 3.94843400  | 1.63269900  | -2.41596200 |
| H | 5.68376500  | 2.89531400  | -1.17016400 |

1 2 1.0 6 1.0 10 1.0 11 1.0

2 3 1.0 8 1.0 9 1.0  
3 4 1.0 7 1.0 16 1.0  
4 5 1.0 12 1.0 13 1.0  
5 6 1.0 14 1.0 33 1.0  
6 15 1.0 20 1.0  
7  
8  
9  
10  
11  
12  
13  
14  
15  
16  
17 20 1.0  
18 19 2.0 20 1.0 21 1.0  
19  
20  
21 22 1.0 23 1.0 32 1.0  
22 25 1.0 26 1.0 27 1.0  
23  
24 25 1.0 28 1.0 29 1.0 32 1.0  
25 30 1.0 31 1.0  
26  
27  
28  
29  
30  
31  
32 44 1.5  
33 34 1.5 35 1.5  
34 36 1.5 43 1.0  
35 37 1.5 38 1.0  
36 39 1.5 40 1.0  
37 39 1.5 41 1.0  
38  
39 42 1.0  
40  
41  
42  
43  
44 45 1.5 57 1.0  
45 46 1.0 47 1.0  
46  
47 48 1.0 49 1.0 50 1.0  
48

49  
50 51 1.0 52 1.0 53 1.0  
51  
52  
53 54 1.0 55 1.0 57 1.0  
54  
55  
56  
57 58 1.0 59 1.0  
58  
59  
60 61 2.0  
61 62 1.0 66 1.0  
62  
63 64 1.5 68 1.5 69 1.0  
64 65 1.5 70 1.0  
65 66 1.5 71 1.0  
66 67 1.5  
67 68 1.5 72 1.0  
68 73 1.0  
69  
70  
71  
72  
73

### Structure of TS3

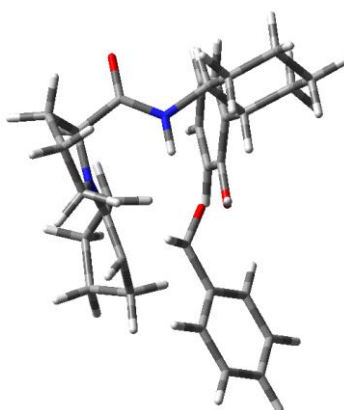

|                                           |              |
|-------------------------------------------|--------------|
| Electronic Energy (a.u)                   | -1501.285707 |
| EE + Zero-point Energy (a.u)              | -1500.656332 |
| EE + Thermal Energy Correction (a.u)      | -1500.626622 |
| EE + Thermal Enthalpy Correction (a.u)    | -1500.625678 |
| EE + Thermal Free Energy Correction (a.u) | -1500.715901 |

|   |             |             |             |
|---|-------------|-------------|-------------|
| C | -2.76014400 | -0.04434300 | -2.69145200 |
| C | -3.60747900 | -1.18259000 | -3.26709500 |
| C | -3.04007400 | -2.54408900 | -2.84744500 |
| C | -2.98444400 | -2.65802200 | -1.32115000 |
| C | -2.15162500 | -1.52362500 | -0.68634200 |
| C | -2.66908200 | -0.13279600 | -1.15143800 |
| H | -3.65970000 | -3.36012900 | -3.26358500 |
| H | -4.65597400 | -1.08682100 | -2.92424100 |
| H | -3.63931100 | -1.10614000 | -4.36998600 |
| H | -1.74473900 | -0.07599200 | -3.13350000 |
| H | -3.19010100 | 0.93404200  | -2.97777100 |
| H | -4.01191700 | -2.65056100 | -0.90867400 |
| H | -2.55011100 | -3.63295700 | -1.02648900 |
| H | -1.08521500 | -1.63143500 | -1.04130900 |
| H | -3.67360300 | 0.07935400  | -0.69960800 |
| H | -2.02796700 | -2.68025400 | -3.27544800 |
| H | -0.69795300 | 0.68372500  | -0.87416500 |
| C | -2.10333000 | 2.04431500  | -0.04596400 |
| O | -3.27558600 | 2.30260100  | 0.20102900  |
| N | -1.69983300 | 0.90990400  | -0.70020200 |
| C | -1.03194900 | 3.08553200  | 0.39012700  |
| C | -1.24199900 | 4.38883100  | -0.40739900 |
| H | -1.17658800 | 3.25317400  | 1.49005300  |
| C | 0.91113200  | 3.41360200  | -1.09065800 |
| C | -0.20975500 | 4.36243100  | -1.54632800 |
| H | -1.09320300 | 5.26803300  | 0.24544200  |
| H | -2.28018300 | 4.46403500  | -0.78801700 |
| H | 1.83427800  | 3.96754100  | -0.81488100 |
| H | 1.17769300  | 2.67711500  | -1.88150000 |
| H | 0.17741200  | 5.37295000  | -1.76152600 |
| H | -0.67421200 | 3.99982000  | -2.48271900 |
| N | 0.38109900  | 2.70067400  | 0.11469000  |
| C | -2.18529200 | -1.66753100 | 0.81534200  |
| C | -1.01501200 | -1.97351900 | 1.54520700  |
| C | -3.38465900 | -1.56042400 | 1.53181700  |
| C | -1.04941400 | -2.22219300 | 2.93131100  |
| C | -3.43014600 | -1.78388400 | 2.91038600  |
| H | -4.30207600 | -1.29769100 | 1.00288500  |
| C | -2.26449500 | -2.13035000 | 3.60404700  |
| H | -0.12803900 | -2.48296100 | 3.44414700  |
| H | -4.37275500 | -1.69231600 | 3.44272400  |
| H | -2.30635300 | -2.32306200 | 4.67499100  |
| O | 0.22836500  | -2.04179100 | 0.99261300  |
| C | 2.37283900  | 1.32663600  | 0.39757900  |
| C | 1.09983200  | 1.77697500  | 0.81269400  |
| H | 3.01849300  | 1.97789200  | -0.18534600 |
| C | 0.49880300  | 1.14152500  | 2.03324900  |



|   |             |             |             |
|---|-------------|-------------|-------------|
| H | 0.34816600  | 0.05088200  | 1.79434600  |
| H | -0.50349800 | 1.51646700  | 2.30746300  |
| C | 1.45559800  | 1.25834600  | 3.23441200  |
| H | 1.19177200  | 0.46820100  | 3.96533000  |
| H | 1.28761600  | 2.22153100  | 3.75094700  |
| C | 2.93701400  | 1.13303800  | 2.83878400  |
| H | 3.47576500  | 0.52182200  | 3.58579700  |
| H | 3.41616600  | 2.12959200  | 2.85753000  |
| C | 3.10523400  | 0.51039000  | 1.44152100  |
| H | 2.71255400  | -0.53004900 | 1.46158500  |
| H | 4.17672800  | 0.42791000  | 1.18324200  |
| C | 1.92631600  | 0.10404200  | -1.14530600 |
| O | 0.77304700  | -0.36955700 | -0.93557400 |
| H | 0.28835600  | -1.60738200 | 0.03750900  |
| H | 1.98235500  | 0.96208500  | -1.84119200 |
| C | 5.32275300  | -2.53025200 | -1.22699200 |
| C | 4.11329100  | -2.96924400 | -0.68020700 |
| C | 3.01179700  | -2.10988200 | -0.63809900 |
| C | 3.11666400  | -0.80714300 | -1.14530700 |
| C | 4.33299400  | -0.36807800 | -1.69121600 |
| C | 5.43183000  | -1.22924800 | -1.73197300 |
| H | 6.18049100  | -3.19998400 | -1.26044300 |
| H | 4.02638700  | -3.98042000 | -0.28533200 |
| H | 2.06189500  | -2.44662900 | -0.20691500 |
| H | 4.42468500  | 0.64297000  | -2.08292500 |
| H | 6.37401500  | -0.88914100 | -2.15700900 |

1 2 1.0 6 1.0 10 1.0 11 1.0

2 3 1.0 8 1.0 9 1.0

3 4 1.0 7 1.0 16 1.0

4 5 1.0 12 1.0 13 1.0

5 6 1.0 14 1.0 33 1.0

6 15 1.0 20 1.0

7

8

9

10

11

12

13

14

15

16

17 20 1.0

18 19 2.0 20 1.5 21 1.0

19

20

21 22 1.0 23 1.0 32 1.0  
22 25 1.0 26 1.0 27 1.0  
23  
24 25 1.0 28 1.0 29 1.0 32 1.0  
25 30 1.0 31 1.0  
26  
27  
28  
29  
30  
31  
32 45 1.5  
33 34 1.5 35 1.5  
34 36 1.5 43 1.0  
35 37 1.5 38 1.0  
36 39 1.5 40 1.0  
37 39 1.5 41 1.0  
38  
39 42 1.0  
40  
41  
42  
43  
44 45 1.5 46 1.0 56 1.0  
45 47 1.0  
46  
47 48 1.0 49 1.0 50 1.0  
48  
49  
50 51 1.0 52 1.0 53 1.0  
51  
52  
53 54 1.0 55 1.0 56 1.0  
54  
55  
56 57 1.0 58 1.0  
57  
58  
59 60 2.0 62 1.0 66 1.0  
60  
61  
62  
63 64 1.5 68 1.5 69 1.0  
64 65 1.5 70 1.0  
65 66 1.5 71 1.0  
66 67 1.5  
67 68 1.5 72 1.0

68 73 1.0  
 69  
 70  
 71  
 72  
 73

**Structure of TS4**

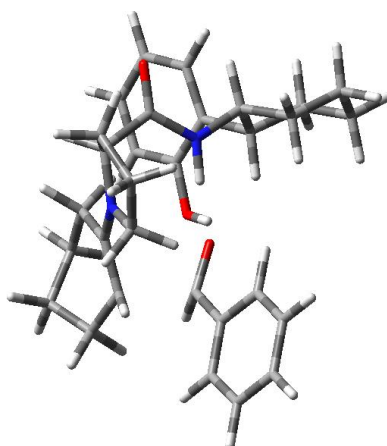

|                                           |              |
|-------------------------------------------|--------------|
| Electronic Energy (a.u)                   | -1501.288463 |
| EE + Zero-point Energy (a.u)              | -1500.659006 |
| EE + Thermal Energy Correction (a.u)      | -1500.629617 |
| EE + Thermal Enthalpy Correction (a.u)    | -1500.628673 |
| EE + Thermal Free Energy Correction (a.u) | -1500.717311 |

|   |             |            |             |
|---|-------------|------------|-------------|
| C | -1.25366700 | 3.25965400 | 0.43010000  |
| C | -2.19198600 | 4.23053500 | -0.29337600 |
| C | -2.53752100 | 3.70802600 | -1.69331400 |
| C | -3.18356400 | 2.32166300 | -1.61026300 |
| C | -2.28116800 | 1.30833200 | -0.87484300 |
| C | -1.87538300 | 1.84891600 | 0.52475700  |
| H | -3.22081500 | 4.41151500 | -2.20449900 |
| H | -3.11811100 | 4.37422400 | 0.29631000  |
| H | -1.71827400 | 5.22735300 | -0.36483100 |
| H | -0.28411200 | 3.21283300 | -0.10395600 |
| H | -1.02795200 | 3.63232600 | 1.44681800  |
| H | -4.16406200 | 2.39515500 | -1.10150700 |
| H | -3.40091100 | 1.94019100 | -2.62689100 |
| H | -1.33602600 | 1.17560000 | -1.47934200 |
| H | -2.76845300 | 1.87163400 | 1.20389300  |
| H | -1.62329900 | 3.66320100 | -2.31654800 |
| H | -0.02350200 | 0.75064700 | 0.49473700  |
| C | -1.05172700 | 0.27537800 | 2.28803200  |
| O | -2.04842400 | 0.42678300 | 2.98376800  |
| N | -0.84139500 | 0.94394700 | 1.10871600  |

|   |             |             |             |
|---|-------------|-------------|-------------|
| C | 0.05229200  | -0.68636400 | 2.81087100  |
| C | 0.70014000  | -0.06626400 | 4.06638100  |
| H | -0.45286000 | -1.65718800 | 3.05490800  |
| C | 2.36927200  | -0.07115900 | 2.25678300  |
| C | 1.99552400  | 0.60660500  | 3.58530000  |
| H | 0.91184100  | -0.84876100 | 4.81738800  |
| H | 0.01562900  | 0.65229900  | 4.55912200  |
| H | 3.26883800  | -0.71557500 | 2.35985500  |
| H | 2.57711600  | 0.67397400  | 1.45650000  |
| H | 2.80217400  | 0.50581900  | 4.33137600  |
| H | 1.83931800  | 1.69216300  | 3.43992700  |
| N | 1.19114600  | -0.91588300 | 1.87709700  |
| C | -2.99367400 | -0.01874300 | -0.78619000 |
| C | -2.50521800 | -1.14639100 | -1.48601500 |
| C | -4.18728300 | -0.16681200 | -0.06964800 |
| C | -3.21994200 | -2.35872000 | -1.52614100 |
| C | -4.89346800 | -1.37334900 | -0.07916300 |
| H | -4.57433000 | 0.67438000  | 0.50740500  |
| C | -4.41757000 | -2.45934000 | -0.82257100 |
| H | -2.82717500 | -3.18661400 | -2.10844700 |
| H | -5.81549900 | -1.46443400 | 0.48805000  |
| H | -4.98222300 | -3.39016700 | -0.84676200 |
| O | -1.32451300 | -1.14993900 | -2.16257900 |
| C | 2.25852200  | -1.77669700 | -0.11105600 |
| C | 1.17096700  | -1.74189500 | 0.79028300  |
| H | 3.21159400  | -1.35967800 | 0.22572300  |
| C | -0.07865900 | -2.55288600 | 0.58117900  |
| H | -0.94616100 | -1.86874200 | 0.40360400  |
| H | -0.32568100 | -3.12744100 | 1.49894700  |
| C | 0.02973600  | -3.51109200 | -0.61311300 |
| H | -0.20709600 | -2.95293600 | -1.55026200 |
| H | -0.74008200 | -4.29970700 | -0.52919700 |
| C | 1.43020200  | -4.11796400 | -0.70113500 |
| H | 1.46962200  | -4.87165700 | -1.50960700 |
| H | 1.67155700  | -4.66049300 | 0.23221900  |
| C | 2.46806300  | -3.01651500 | -0.95875600 |
| H | 2.44170900  | -2.74177900 | -2.03707200 |
| H | 3.48443000  | -3.41741500 | -0.77501600 |
| C | 1.79130100  | -0.35237400 | -1.42920900 |
| H | 1.78575900  | -1.07830400 | -2.26363500 |
| O | 0.68665600  | 0.17931900  | -1.10215100 |
| H | -0.67974300 | -0.37630300 | -1.85169800 |
| C | 4.03815400  | 2.63825300  | -0.74375200 |
| C | 2.91373900  | 1.81184300  | -0.81134500 |
| C | 3.02504100  | 0.50935900  | -1.31827000 |
| C | 4.26722800  | 0.04517000  | -1.77399100 |
| C | 5.39085300  | 0.87316400  | -1.70574400 |

|   |            |             |             |
|---|------------|-------------|-------------|
| C | 5.27825300 | 2.16840600  | -1.18850300 |
| H | 3.94713200 | 3.65039300  | -0.35393100 |
| H | 1.93331100 | 2.17253700  | -0.48973800 |
| H | 4.35859800 | -0.96124500 | -2.18113800 |
| H | 6.35437400 | 0.51154100  | -2.06047700 |
| H | 6.15460100 | 2.81246800  | -1.13895500 |

1 2 1.0 6 1.0 10 1.0 11 1.0

2 3 1.0 8 1.0 9 1.0

3 4 1.0 7 1.0 16 1.0

4 5 1.0 12 1.0 13 1.0

5 6 1.0 14 1.0 33 1.0

6 15 1.0 20 1.0

7

8

9

10

11

12

13

14

15

16

17 20 1.0

18 19 2.0 20 1.5 21 1.0

19

20

21 22 1.0 23 1.0 32 1.0

22 25 1.0 26 1.0 27 1.0

23

24 25 1.0 28 1.0 29 1.0 32 1.0

25 30 1.0 31 1.0

26

27

28

29

30

31

32 45 1.5

33 34 1.5 35 1.5

34 36 1.5 43 1.0

35 37 1.5 38 1.0

36 39 1.5 40 1.0

37 39 1.5 41 1.0

38

39 42 1.0

40

41  
42  
43  
44 45 1.5 46 1.0 56 1.0  
45 47 1.0  
46  
47 48 1.0 49 1.0 50 1.0  
48  
49  
50 51 1.0 52 1.0 53 1.0  
51  
52  
53 54 1.0 55 1.0 56 1.0  
54  
55  
56 57 1.0 58 1.0  
57  
58  
59 60 1.0 61 2.0 65 1.0  
60  
61  
62  
63 64 1.5 68 1.5 69 1.0  
64 65 1.5 70 1.0  
65 66 1.5  
66 67 1.5 71 1.0  
67 68 1.5 72 1.0  
68 73 1.0  
69  
70  
71  
72  
73

**Table S1.**  $R_f$  Values of the related diastereomers determined by thin layer chromatography.

| entry | structure        | $R_f$ | structure        | $R_f$ | mobile phase                                                |
|-------|------------------|-------|------------------|-------|-------------------------------------------------------------|
| 1     | <br>(±)-20       | 0.67  | <br>(±)-37       | 0.56  | Hexane/EtOAc/NEt <sub>3</sub> /MeOH<br>3.5:1:0.25:0.25, v/v |
| 2     | <br>(±)-17       | 0.53  | <br>(±)-18       | 0.49  | Hexane/EtOAc/NEt <sub>3</sub> /MeOH<br>3:1:0.5:0.5, v/v     |
| 3     | <br>(S,1R,2S)-21 | 0.93  | <br>(S,1S,2R)-22 | 0.88  | Hexane/EtOAc/NEt <sub>3</sub> /MeOH<br>3:1:0.5:0.5, v/v     |
| 4     | <br>(S,1R,2R)-23 | 0.73  | <br>(S,1S,2S)-24 | 0.68  | Hexane/EtOAc/NEt <sub>3</sub> /MeOH<br>3:1:0.5:0.5, v/v     |
| 5     | <br>(S,1S,2R)-25 | 0.35  | <br>(S,1R,2S)-26 | 0.47  | Hexane/EtOAc/NEt <sub>3</sub> /MeOH<br>6.5:3:0.25:0.25, v/v |
| 6     | <br>(S,1R,2R)-27 | 0.68  | <br>(S,1S,2S)-28 | 0.54  | Hexane/EtOAc/NEt <sub>3</sub> /MeOH<br>3:1:0.5:0.5, v/v     |
| 7     | <br>(S,1R,2R)-29 | 0.52  | <br>(S,1S,2S)-30 | 0.42  | Hexane/EtOAc/NEt <sub>3</sub> /MeOH<br>3:1:0.5:0.5, v/v     |
| 8     | <br>(S,1S,2R)-31 | 0.30  | <br>(S,1R,2S)-32 | 0.39  | Hexane/EtOAc/NEt <sub>3</sub> /MeOH<br>3:1:0.5:0.5, v/v     |
| 9     | <br>(S,1S,2R)-39 | 0.29  | <br>(S,1R,2S)-40 | 0.36  | Hexane/EtOAc/NEt <sub>3</sub> /MeOH<br>6.5:3:0.25:0.25, v/v |
| 10    | <br>(S,1S,2R)-41 | 0.49  | <br>(S,1R,2S)-42 | 0.52  | Hexane/EtOAc/NEt <sub>3</sub> /MeOH<br>3.5:1:0.25:0.25, v/v |
| 11    | <br>(S,1S,2R)-43 | 0.16  | <br>(S,1R,2S)-44 | 0.24  | Hexane/EtOAc/NEt <sub>3</sub> /MeOH<br>3.5:1:0.25:0.25, v/v |

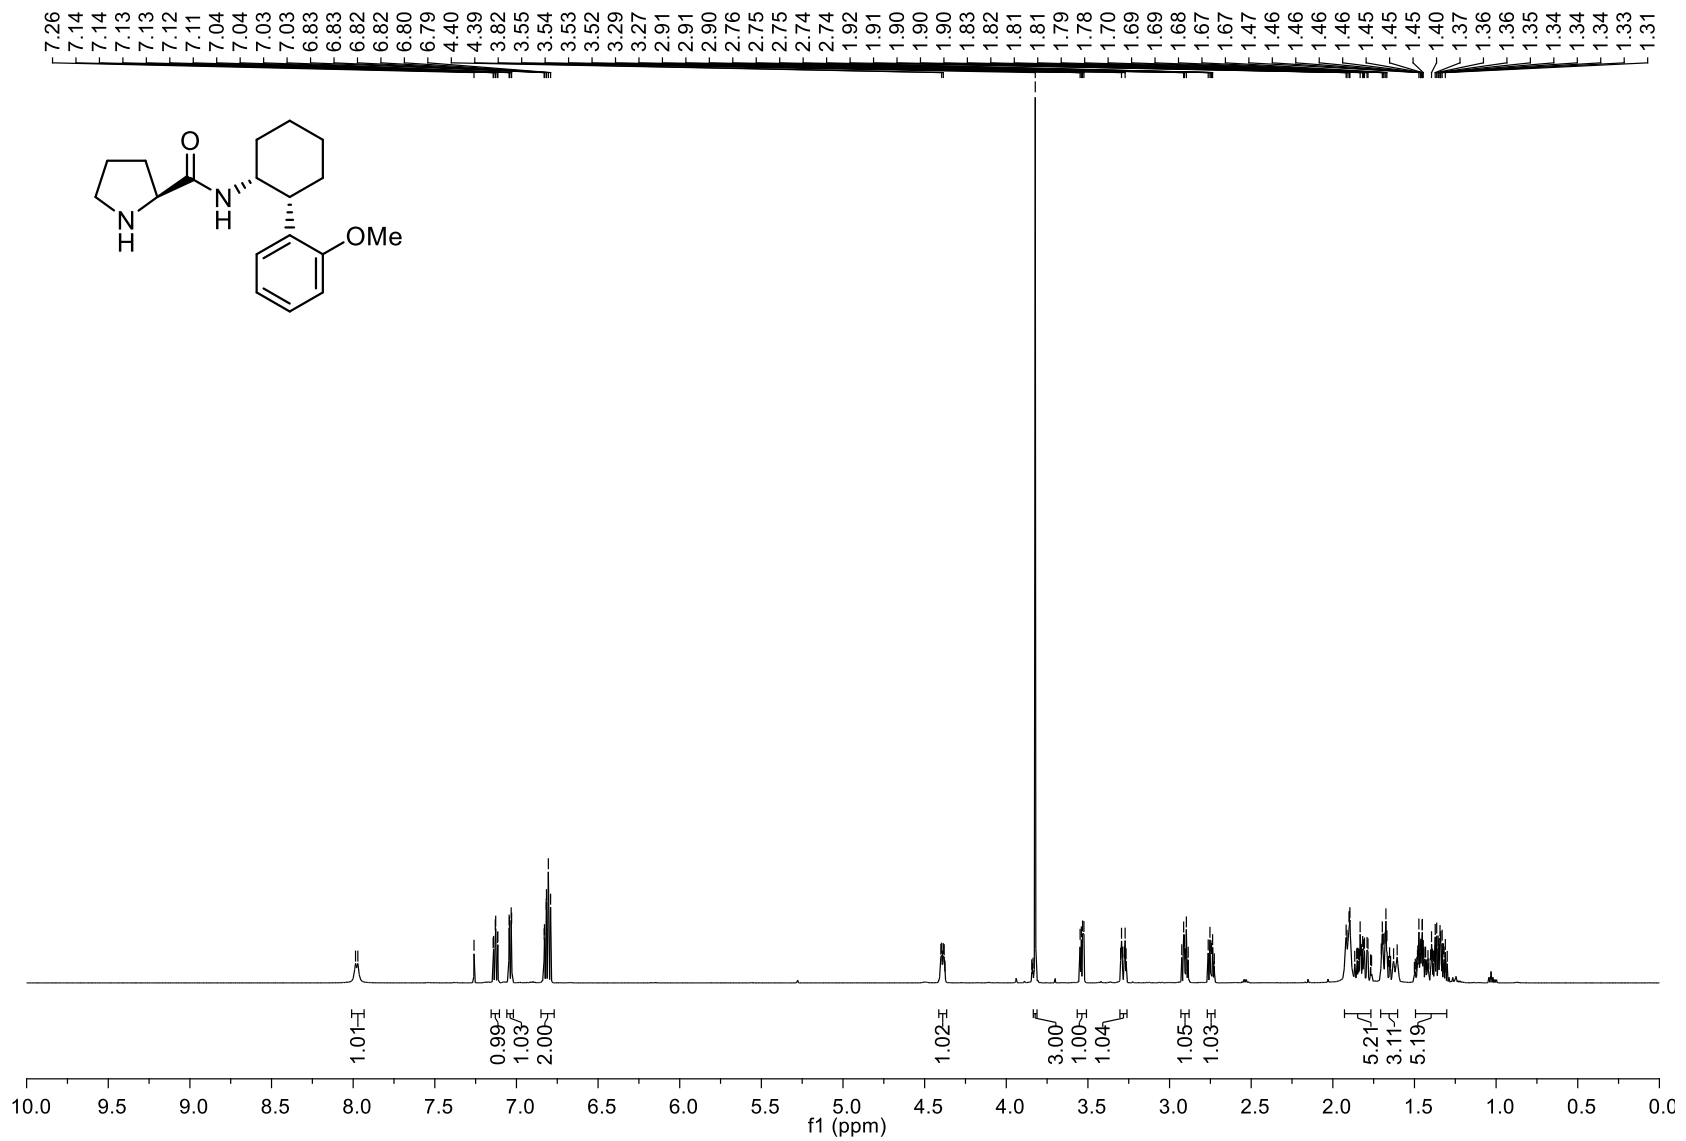

**<sup>1</sup>H NMR Spectrum of (S,1R,2R)-27 (600 MHz, CDCl<sub>3</sub>)**



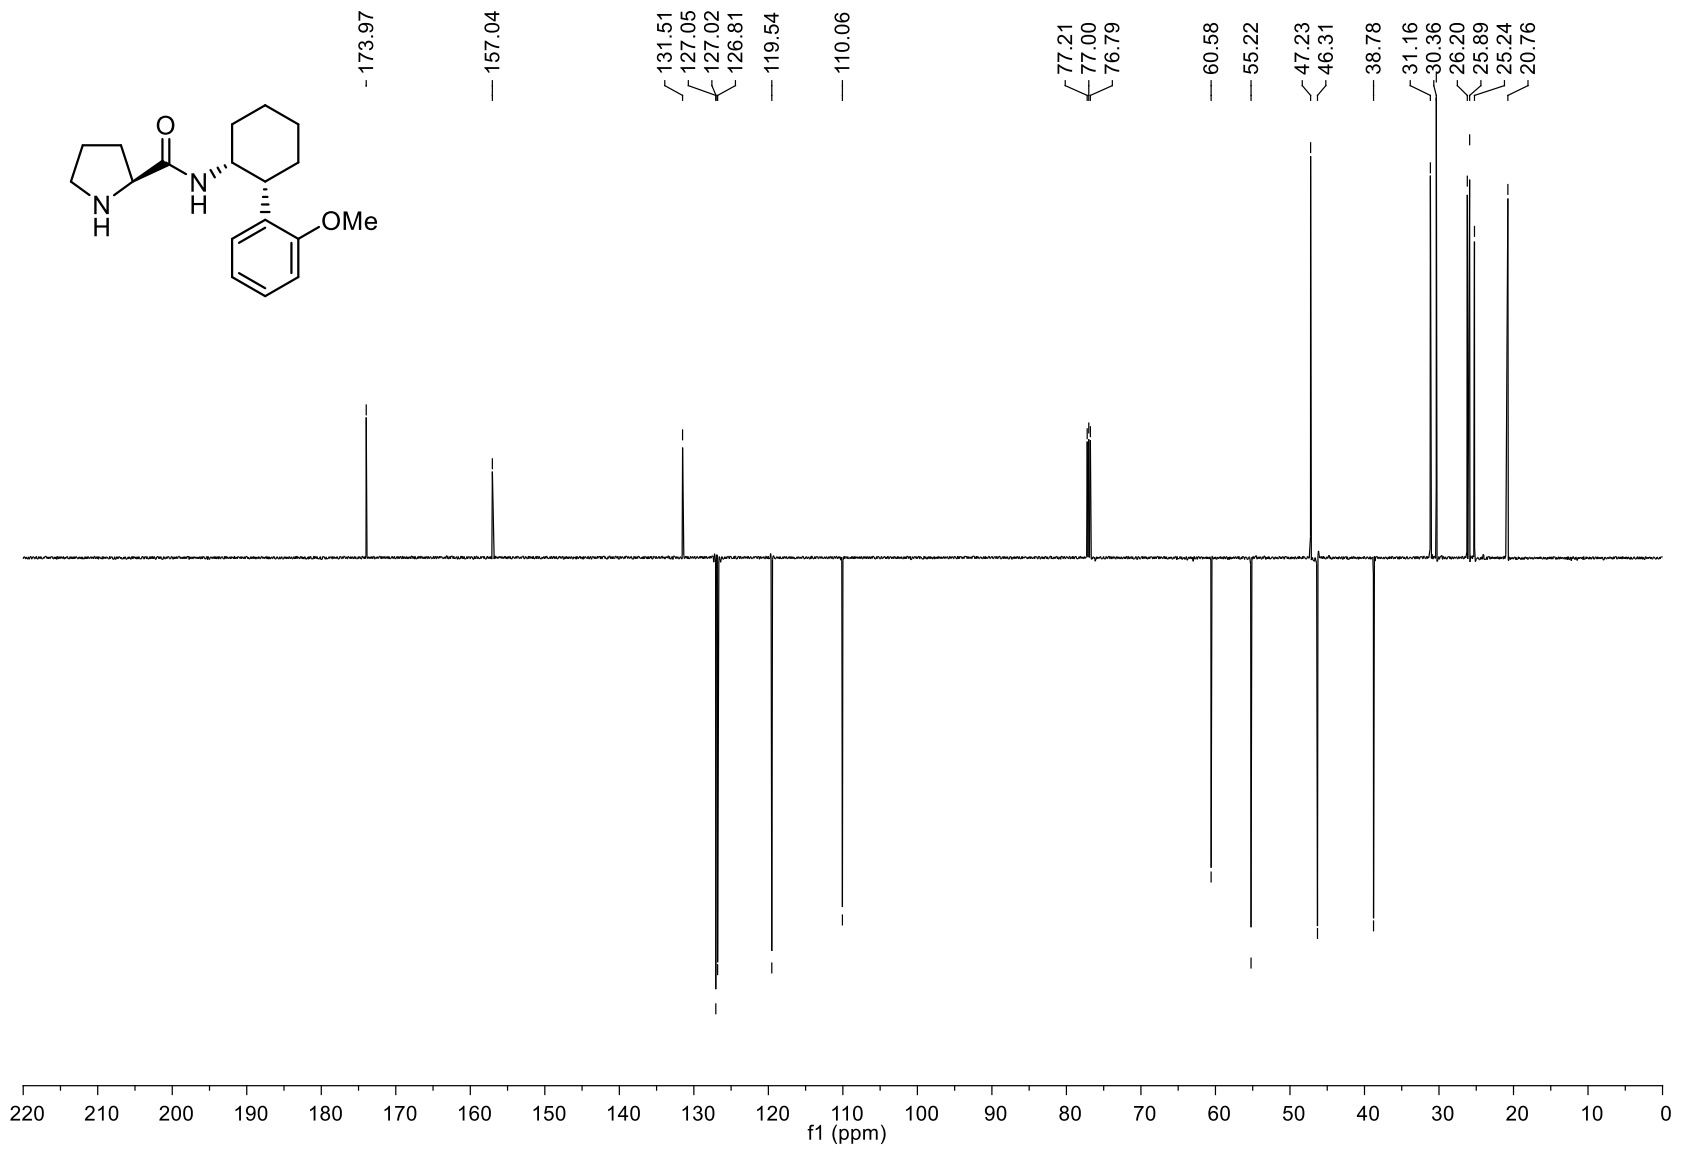

$^{13}\text{C}\{^1\text{H}\}$  NMR Spectrum of (S,1R,2R)-27 (APT, 150 MHz, CDCl<sub>3</sub>)

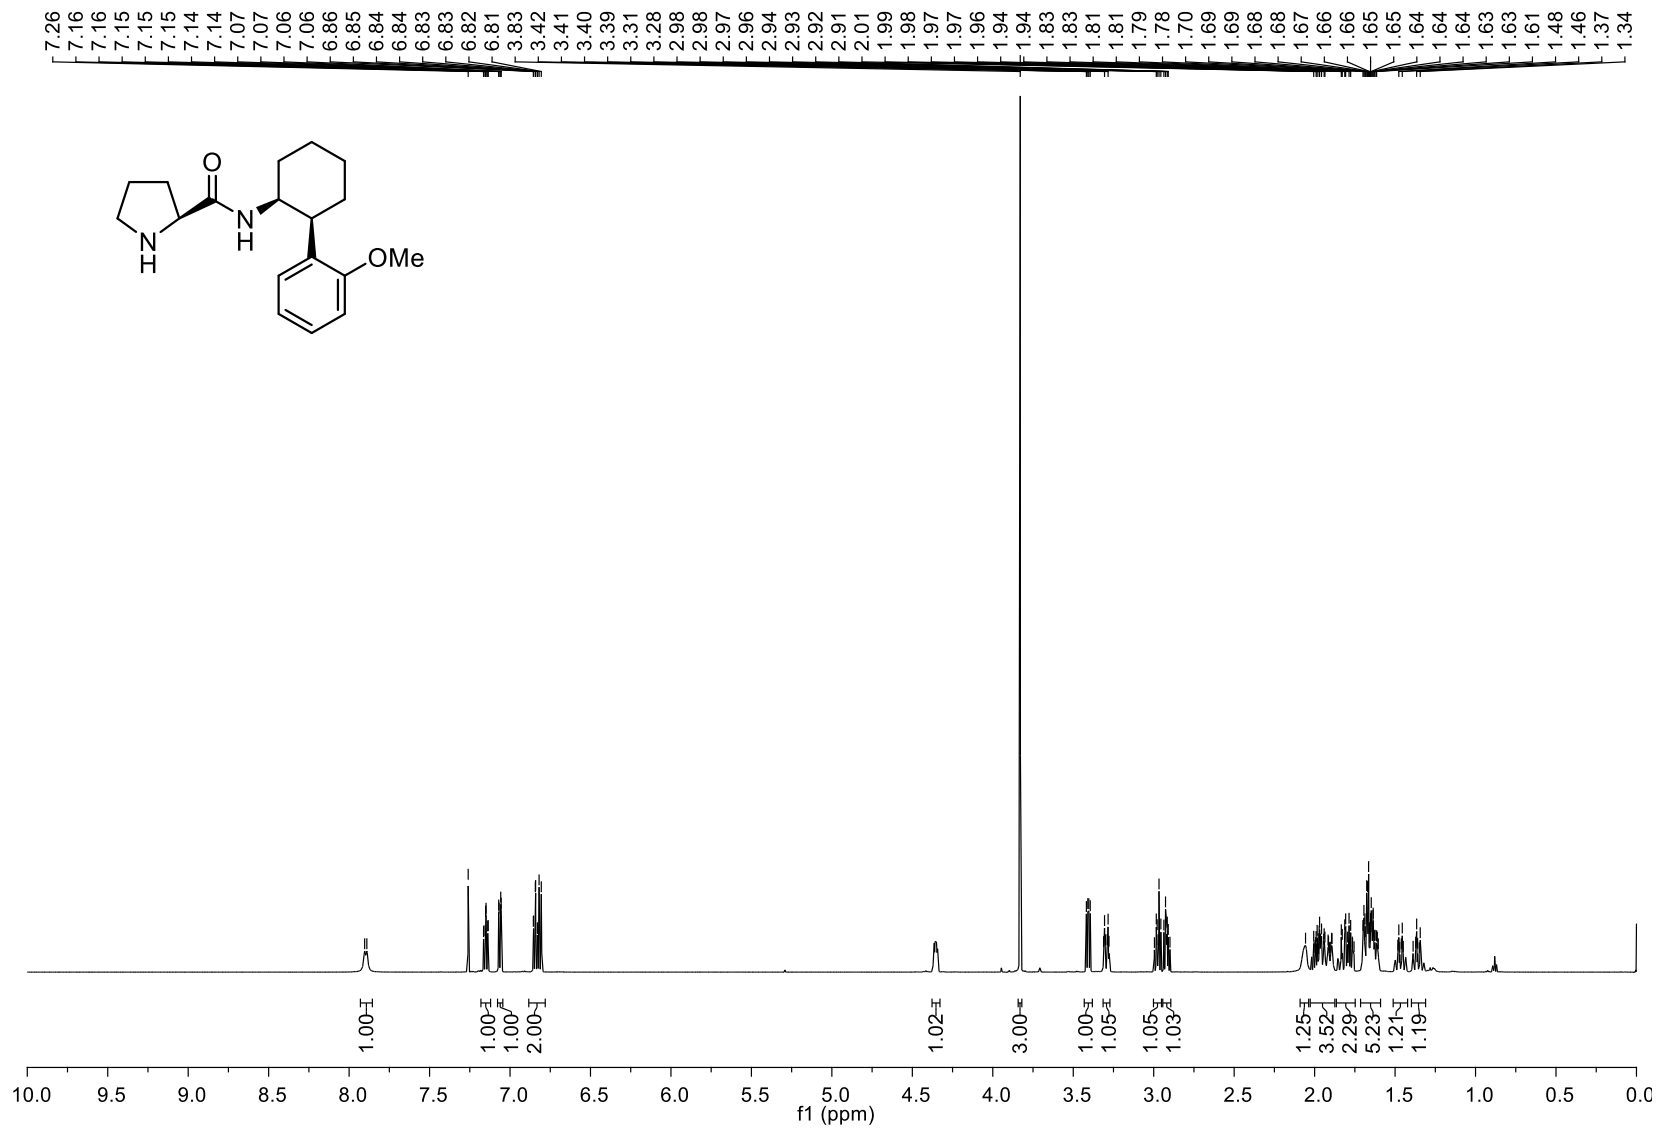

**<sup>1</sup>H NMR Spectrum of (S,1S,2S)-28 (600 MHz, CDCl<sub>3</sub>)**

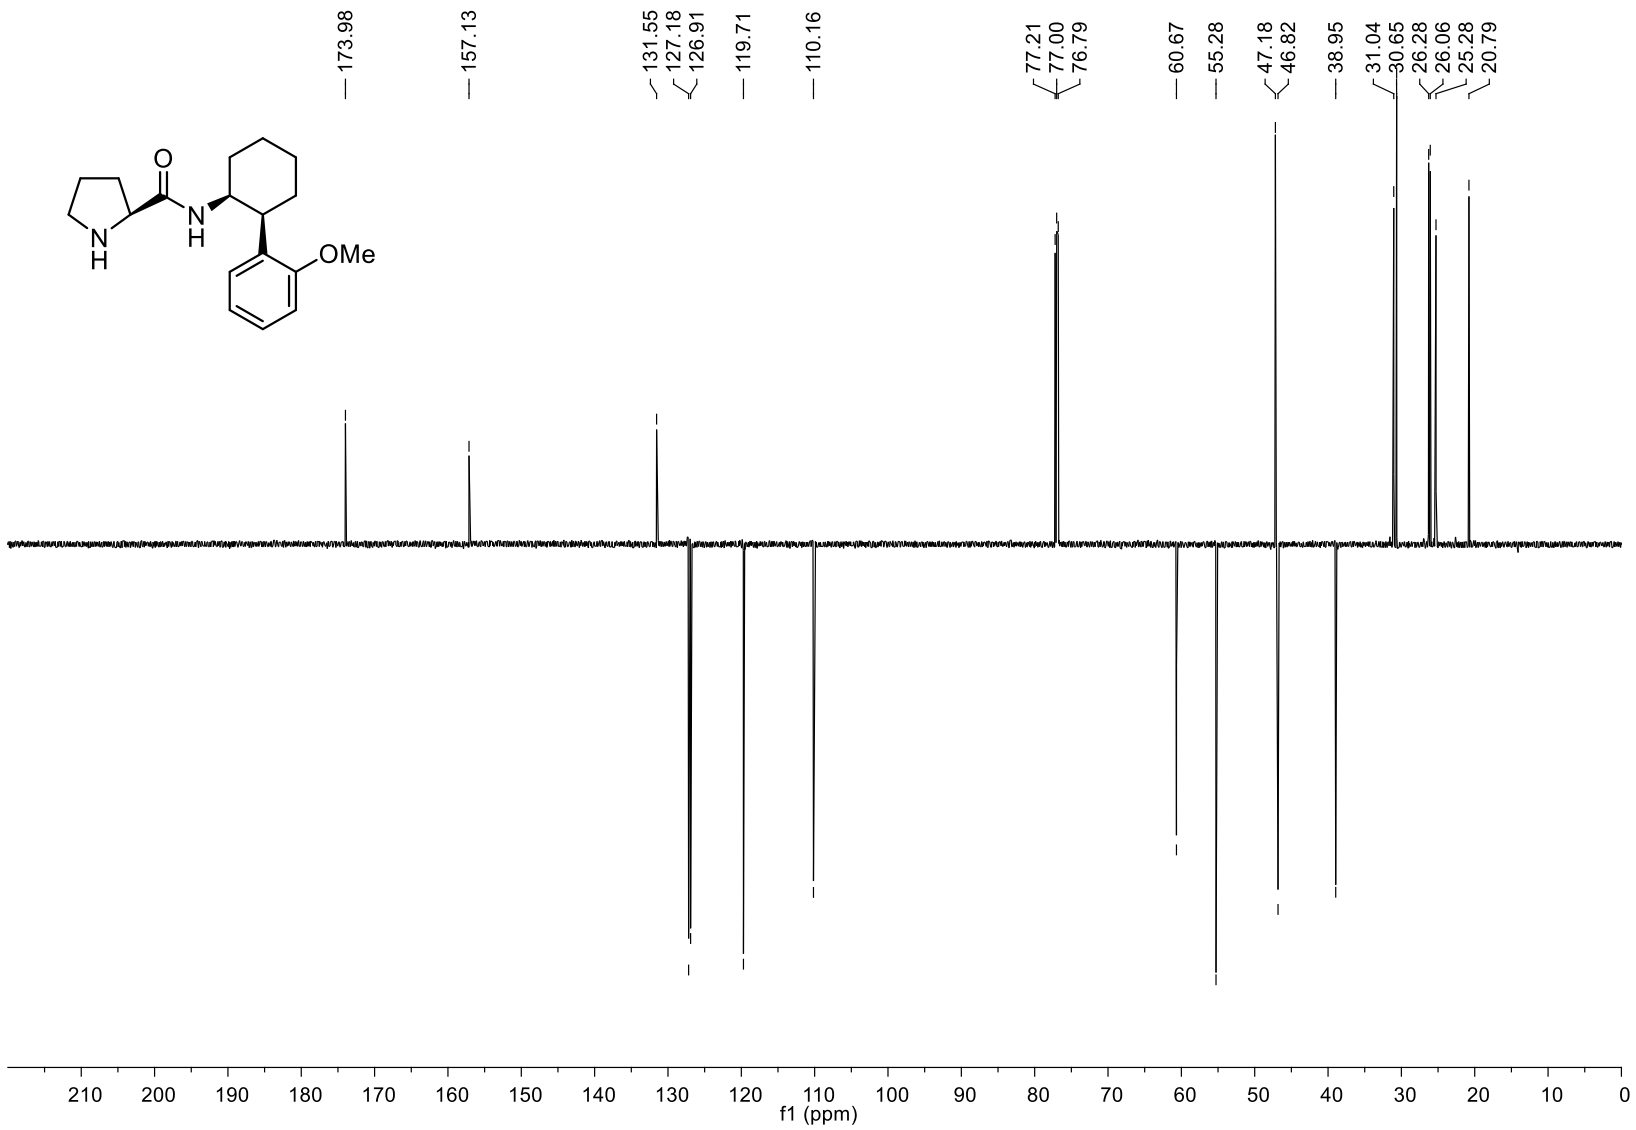

$^{13}\text{C}\{^1\text{H}\}$  NMR Spectrum of (S,1S,2S)-28 (APT, 150 MHz,  $\text{CDCl}_3$ )

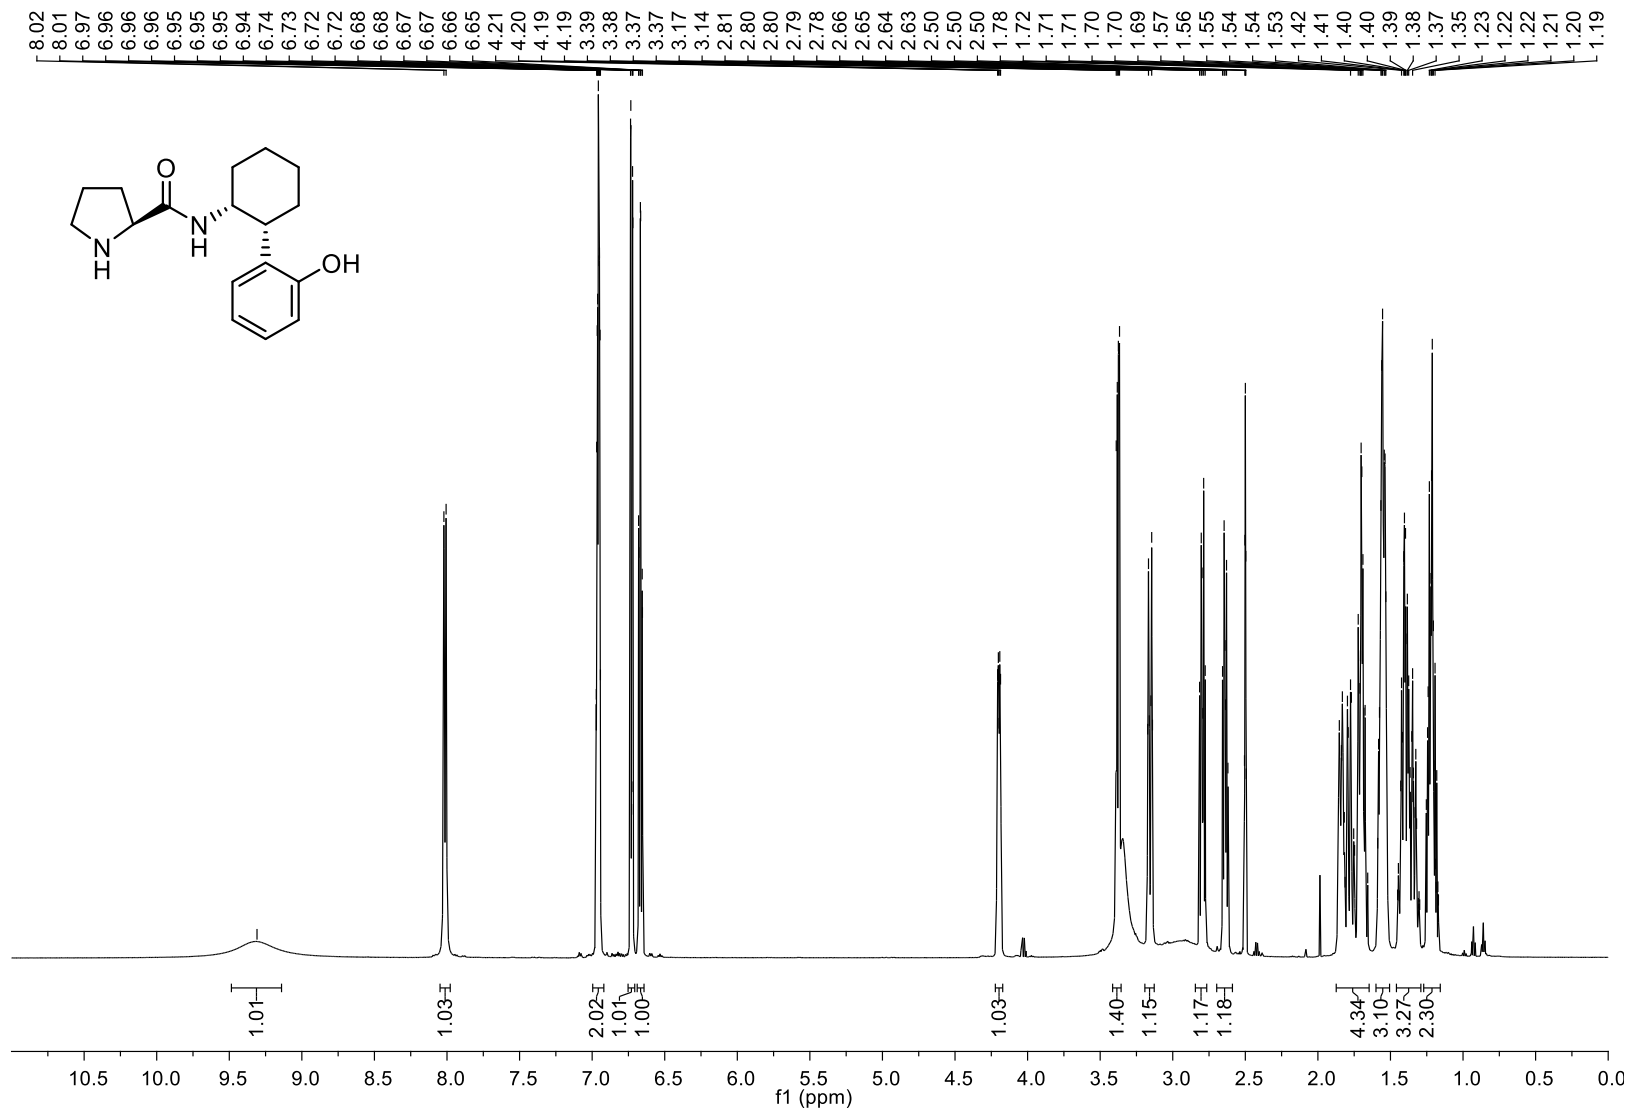

**<sup>1</sup>H NMR Spectrum of (S,1R,2R)-29 (600 MHz, DMSO-d<sub>6</sub>)**

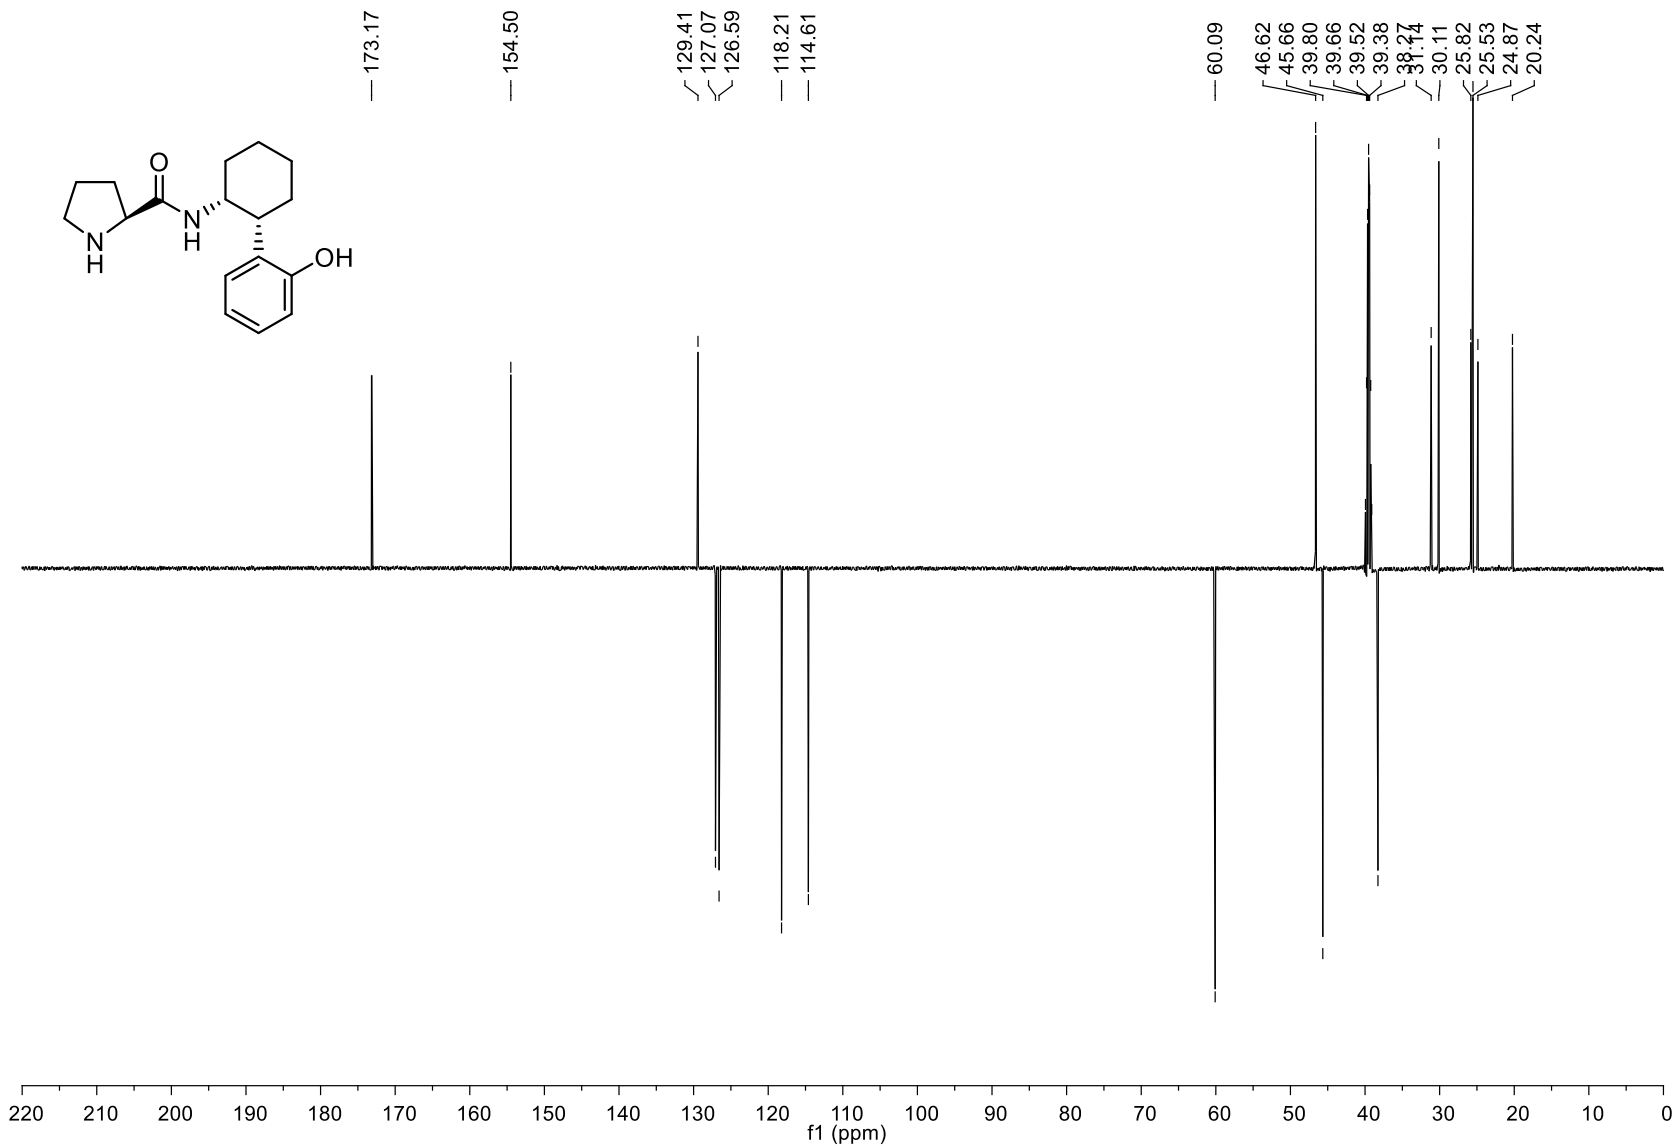

$^{13}\text{C}\{^1\text{H}\}$  NMR Spectrum of (S,1R,2R)-29 (APT, 150 MHz, DMSO- $d_6$ )

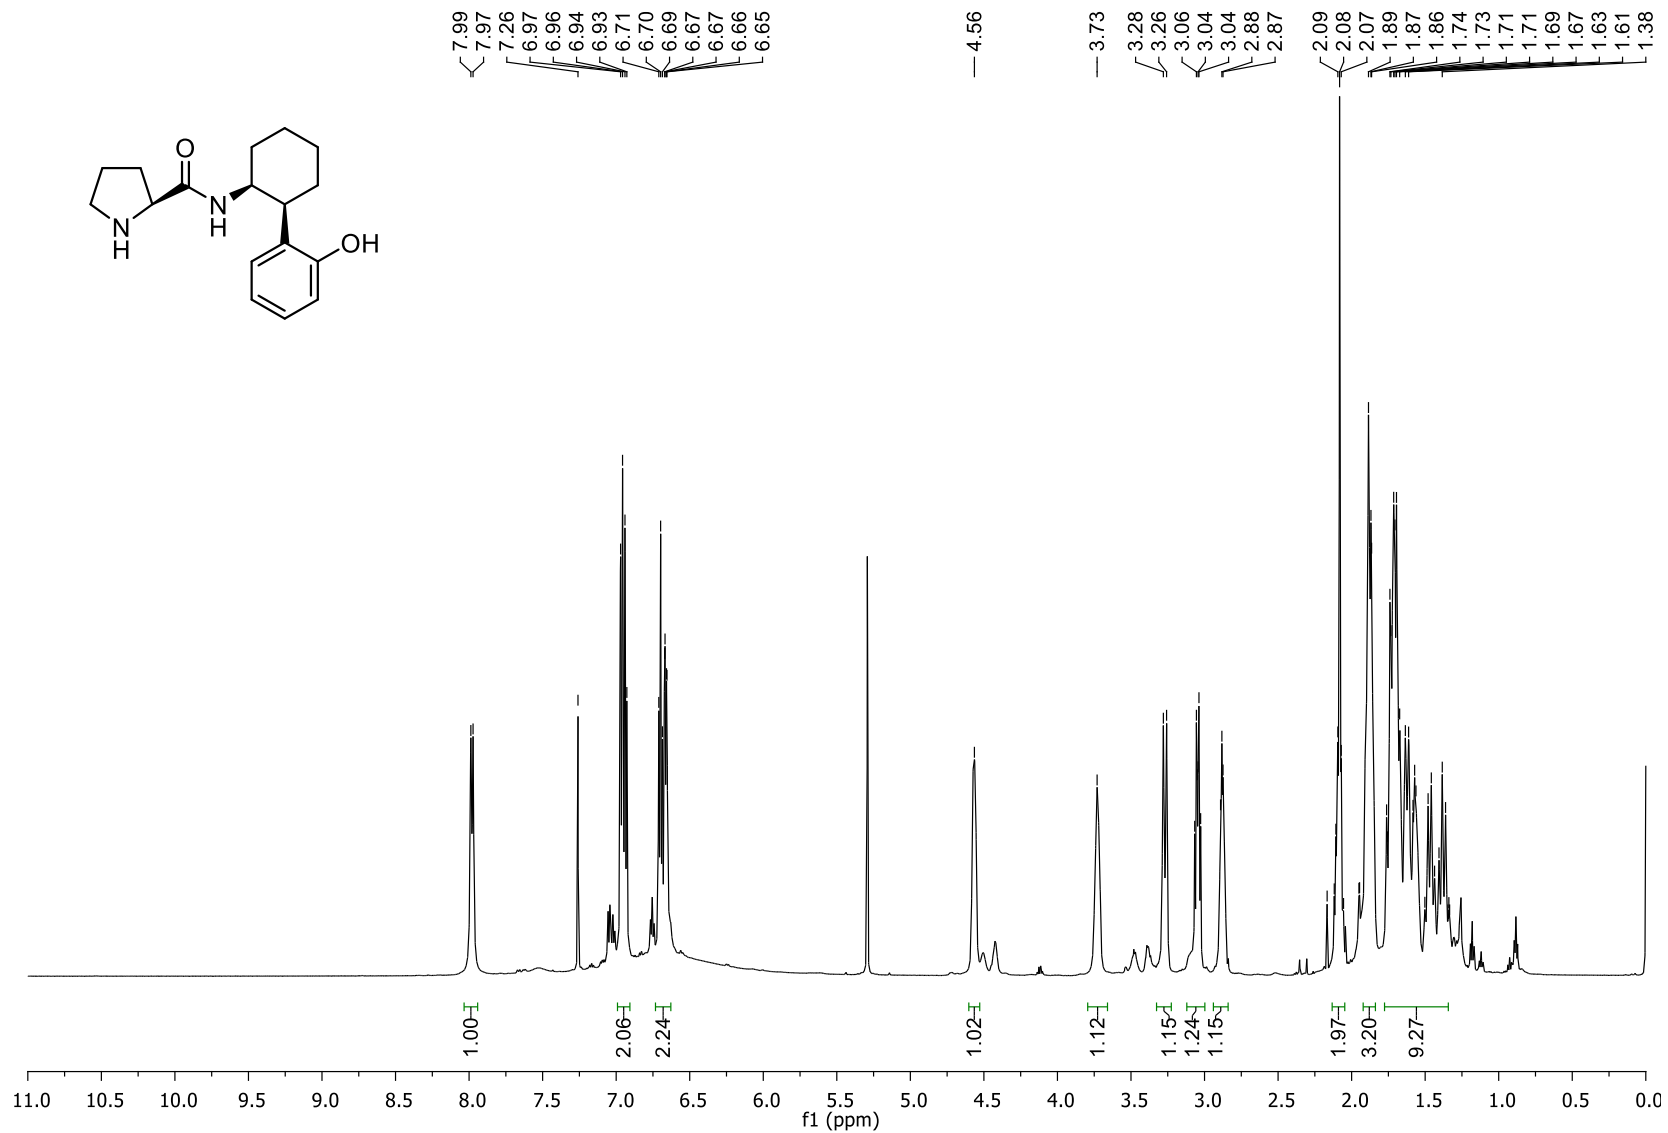

<sup>1</sup>H NMR Spectrum of (S,1S,2S)-30 (600 MHz, CDCl<sub>3</sub>)

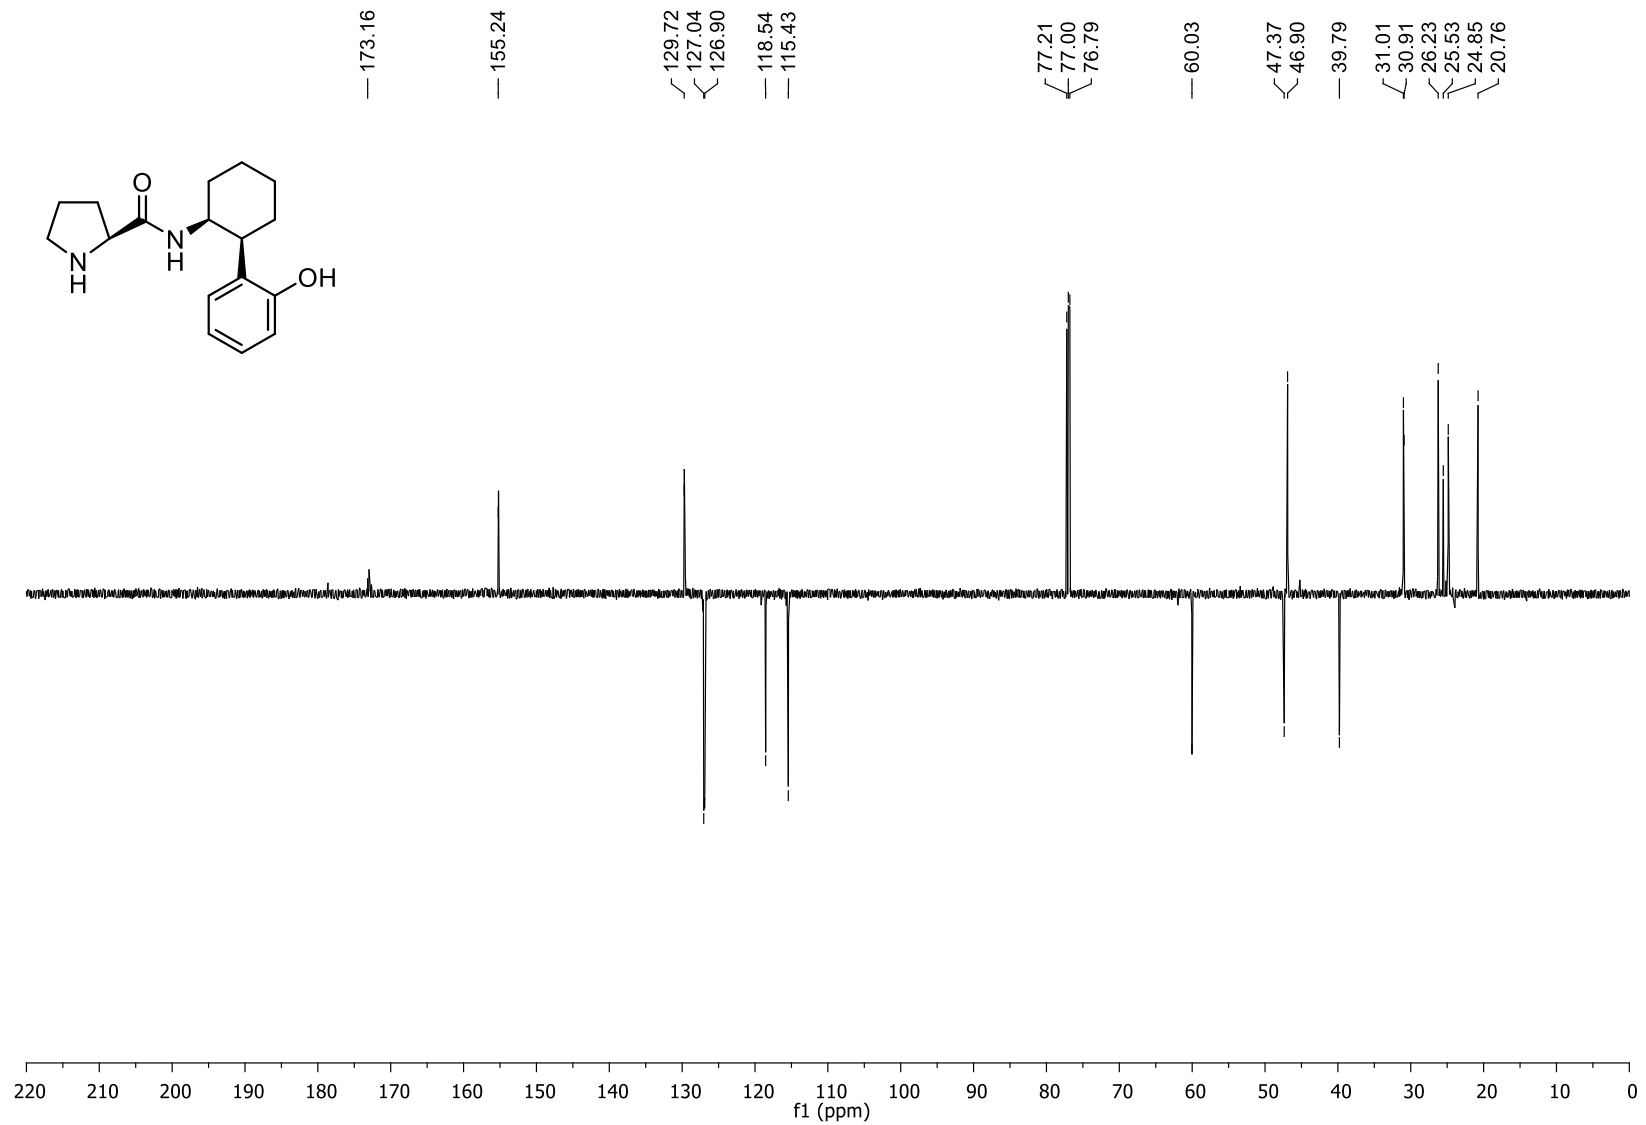

$^{13}\text{C}\{^1\text{H}\}$  NMR Spectrum of (S,1S,2S)-30 (APT, 150 MHz,  $\text{CDCl}_3$ )

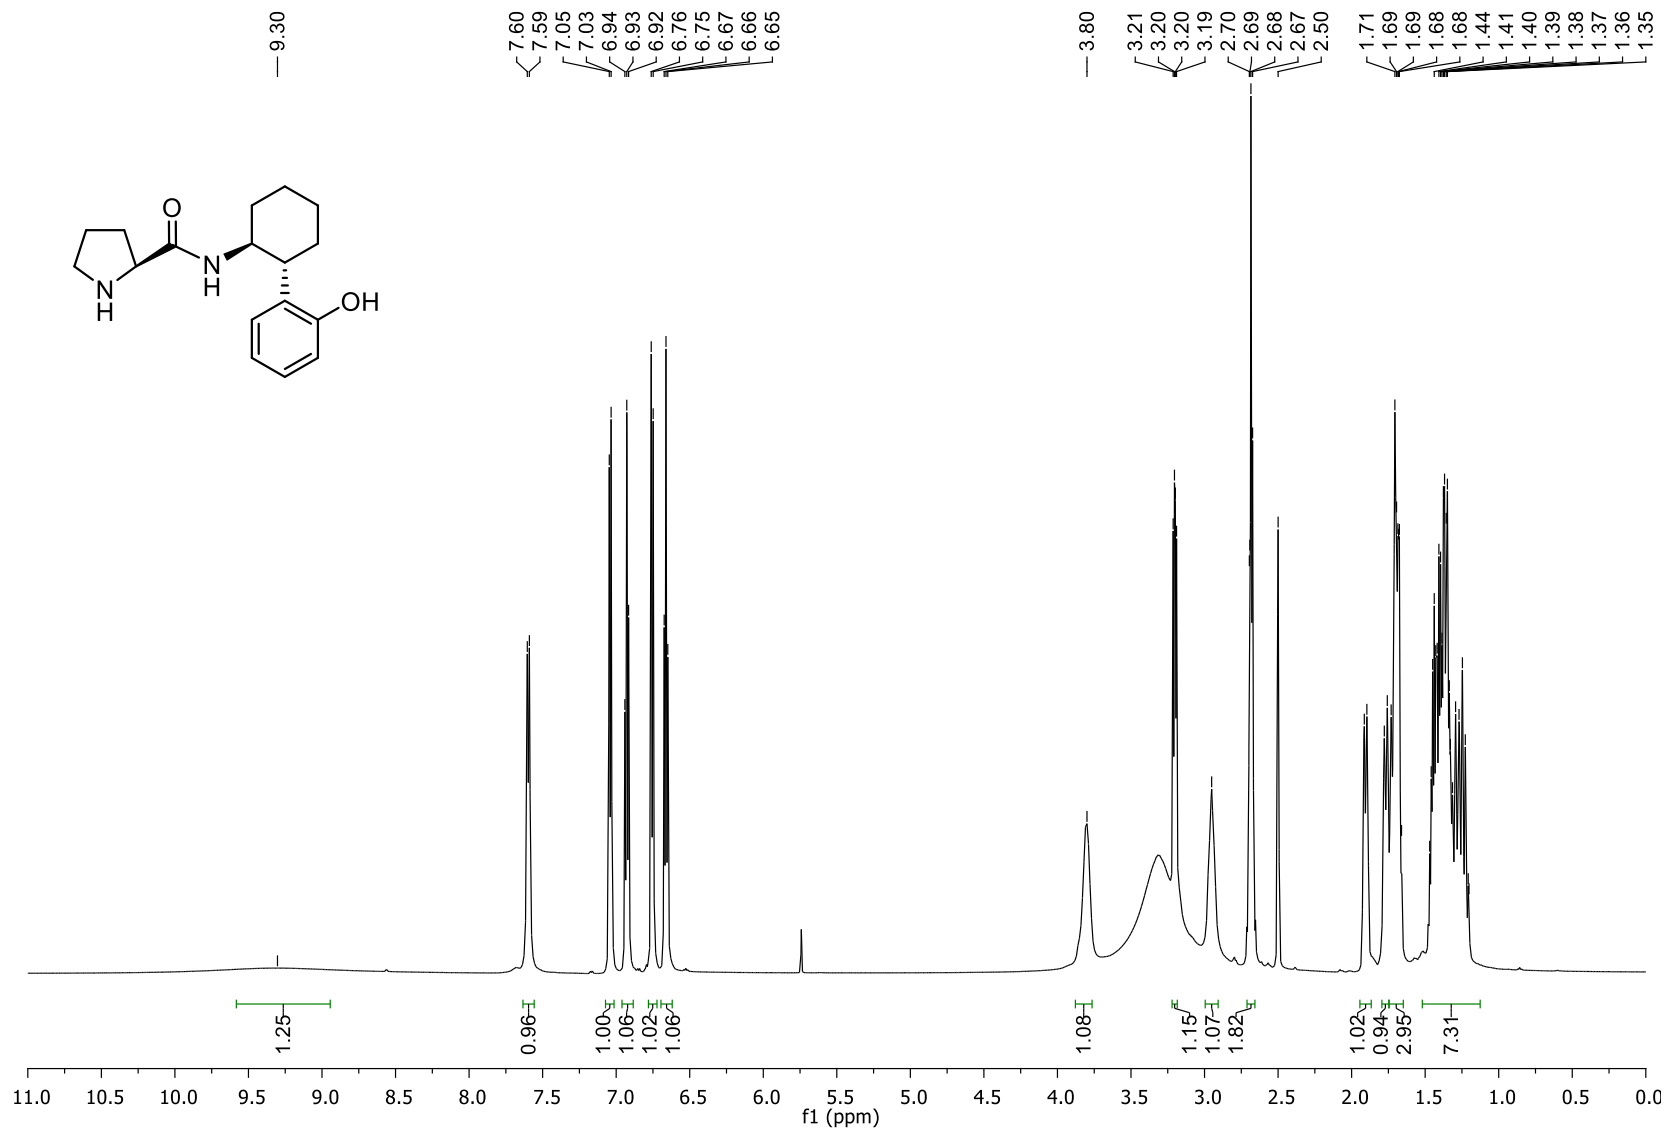

<sup>1</sup>H NMR Spectrum of (S,1S,2R)-31 (600 MHz, DMSO-d<sub>6</sub>)



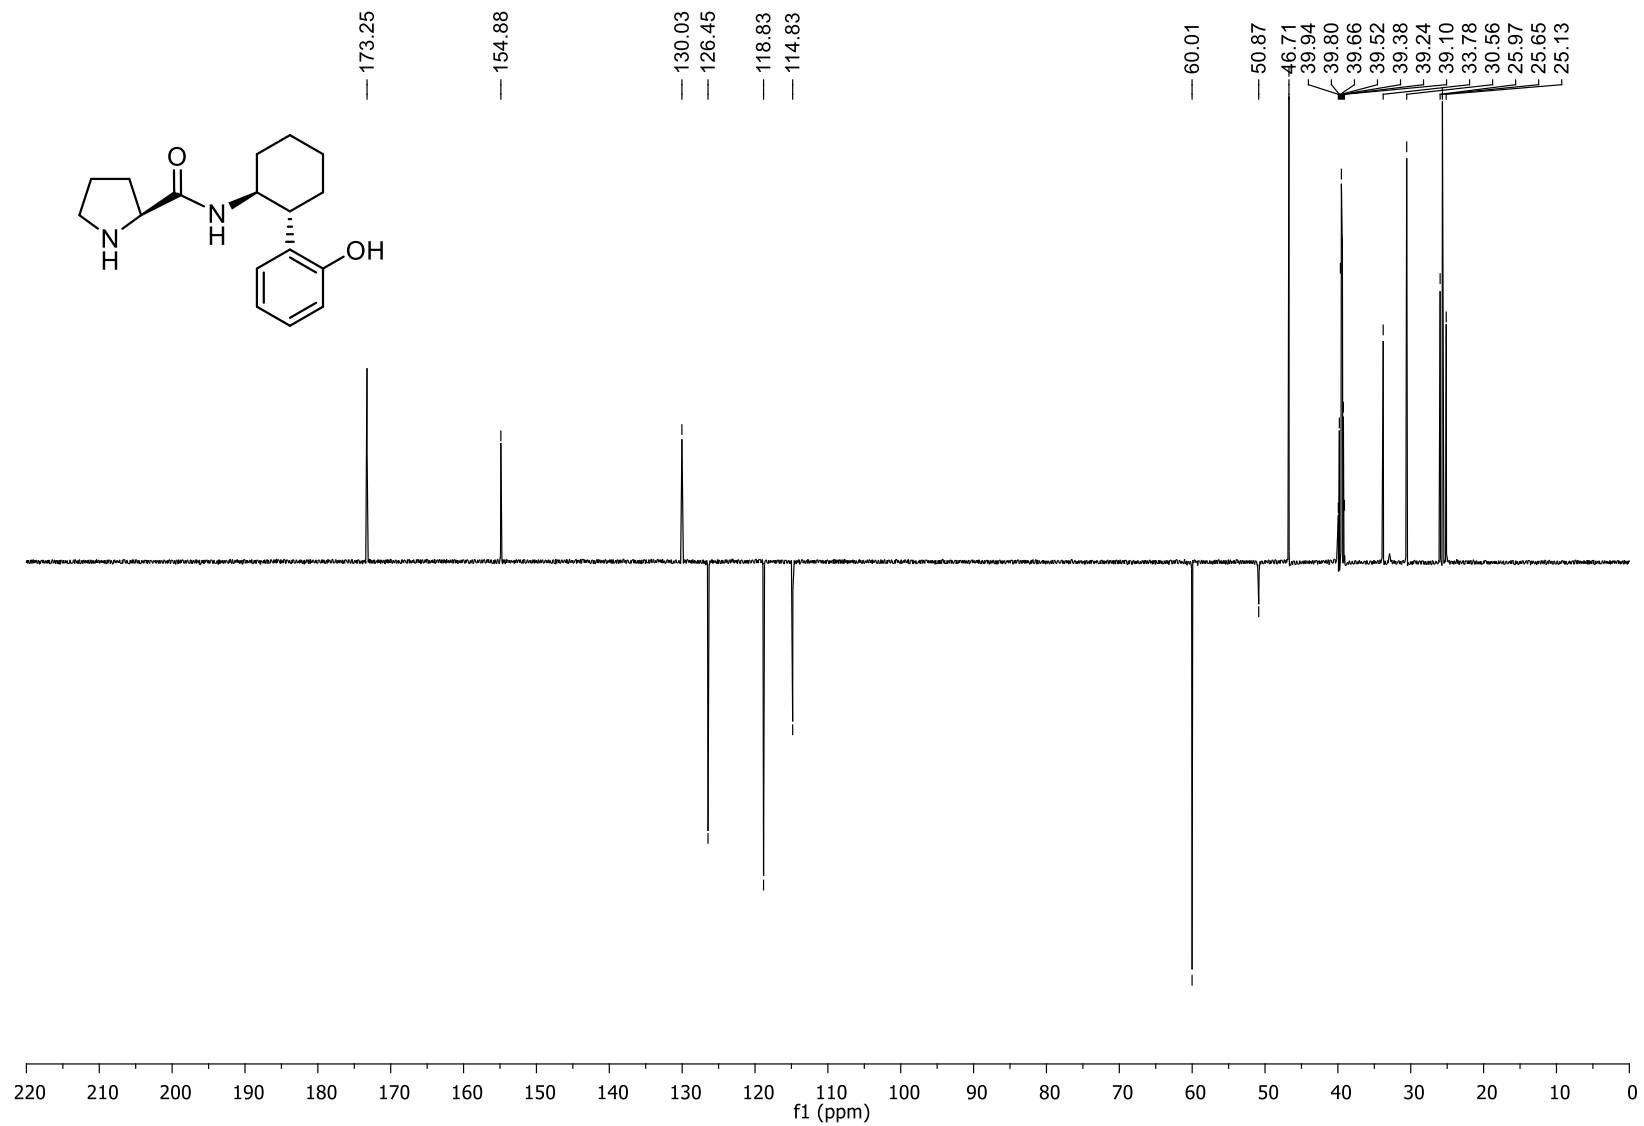

$^{13}\text{C}\{^1\text{H}\}$  NMR Spectrum of (S,1S,2R)-31 (APT, 150 MHz, DMSO- $d_6$ )

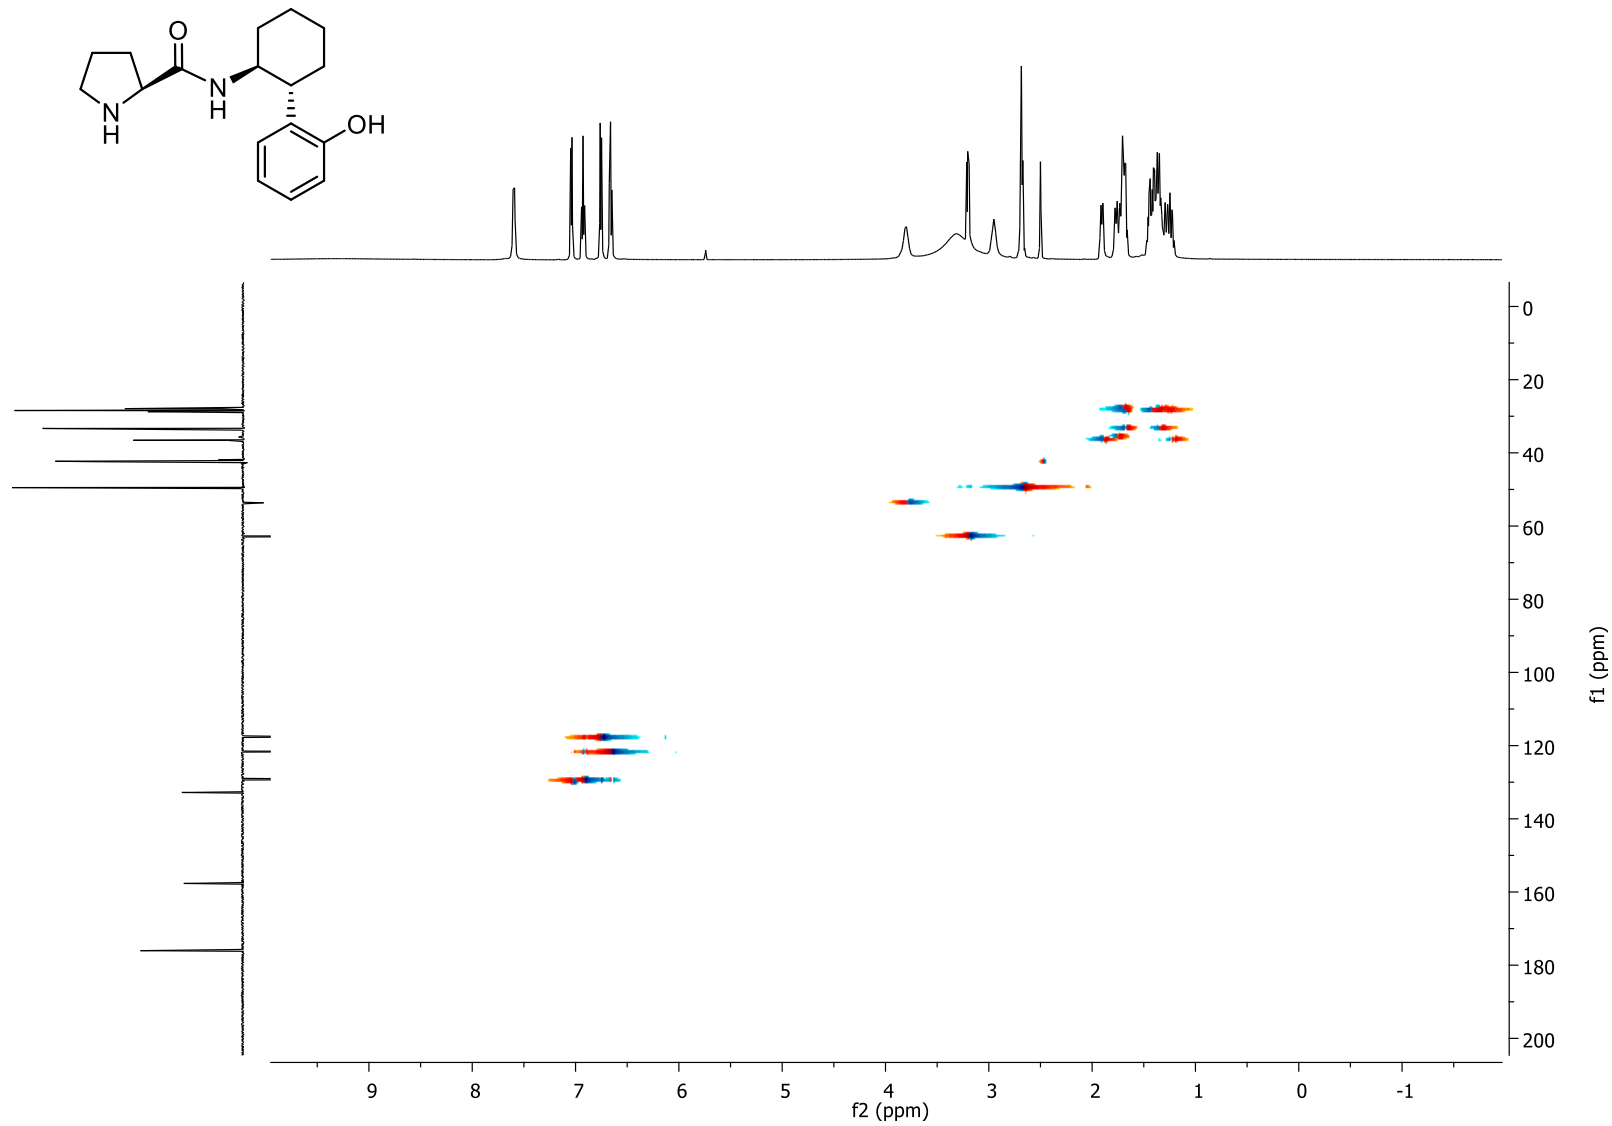

HSQC NMR Spectrum of (S,1S,2R)-31 (DMSO-*d*<sub>6</sub>)

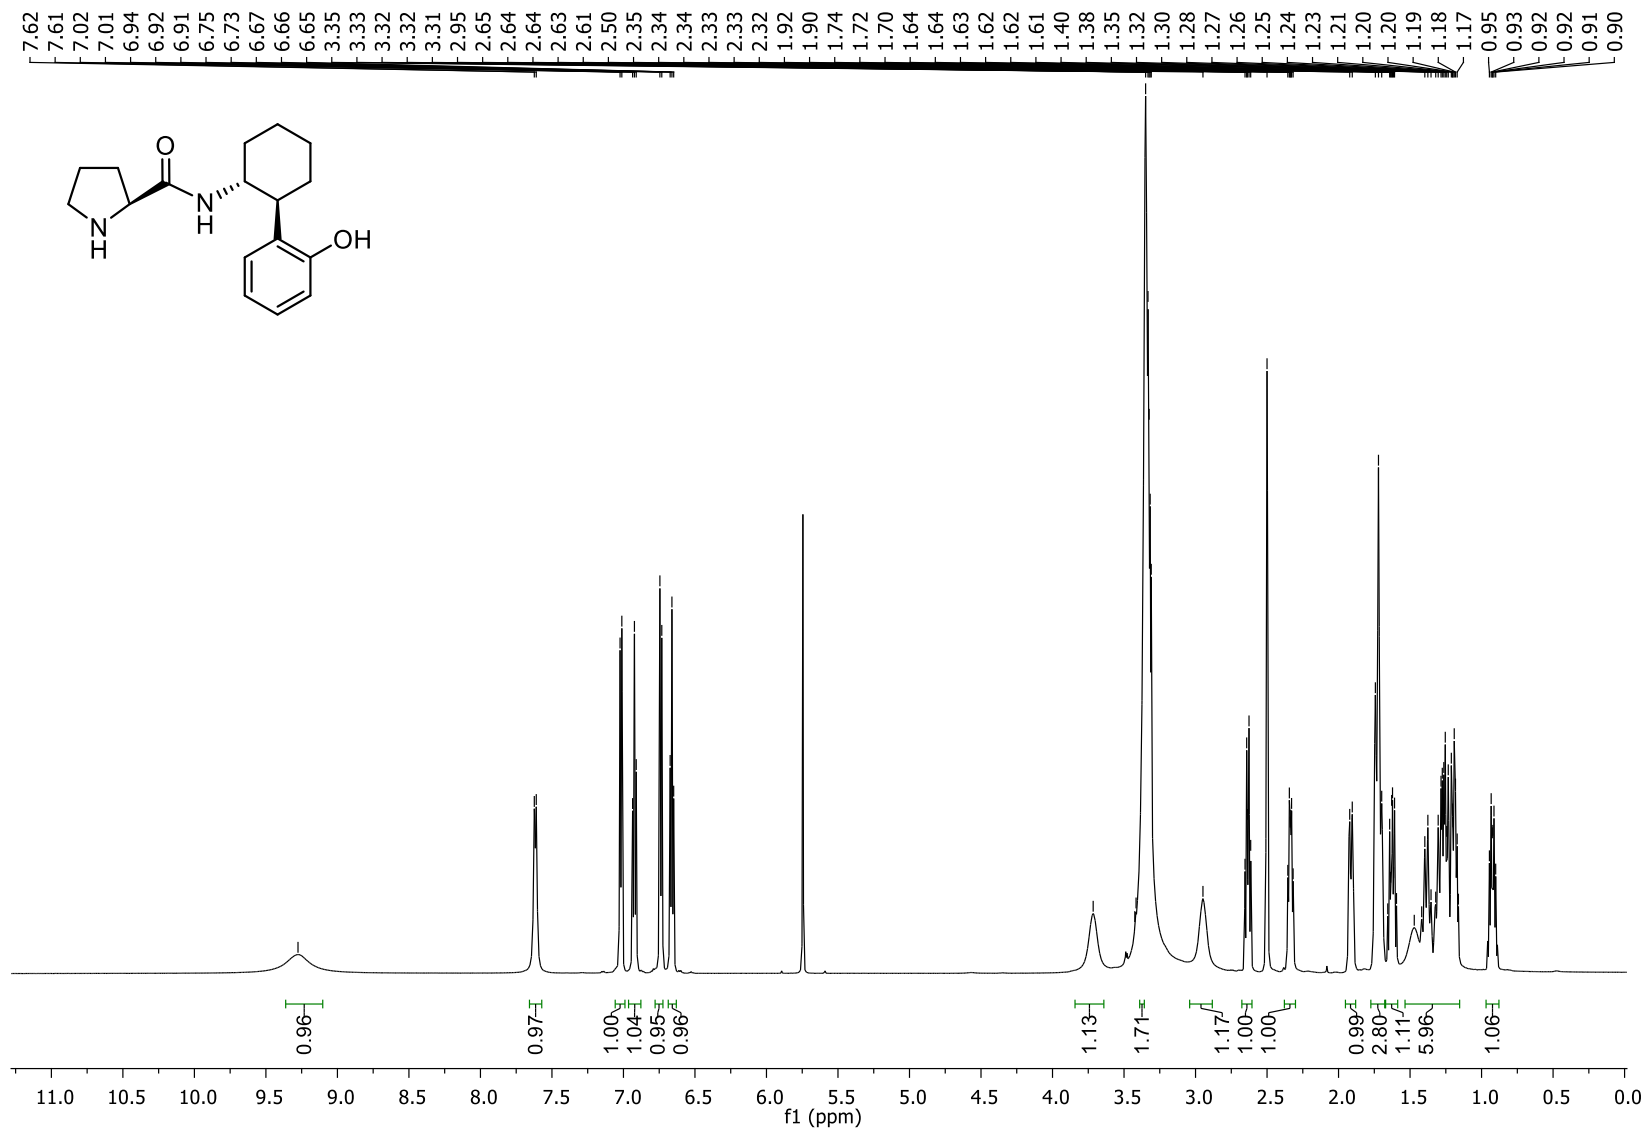

<sup>1</sup>H NMR Spectrum of (S,1R,2S)-32 (600 MHz, DMSO-d<sub>6</sub>)

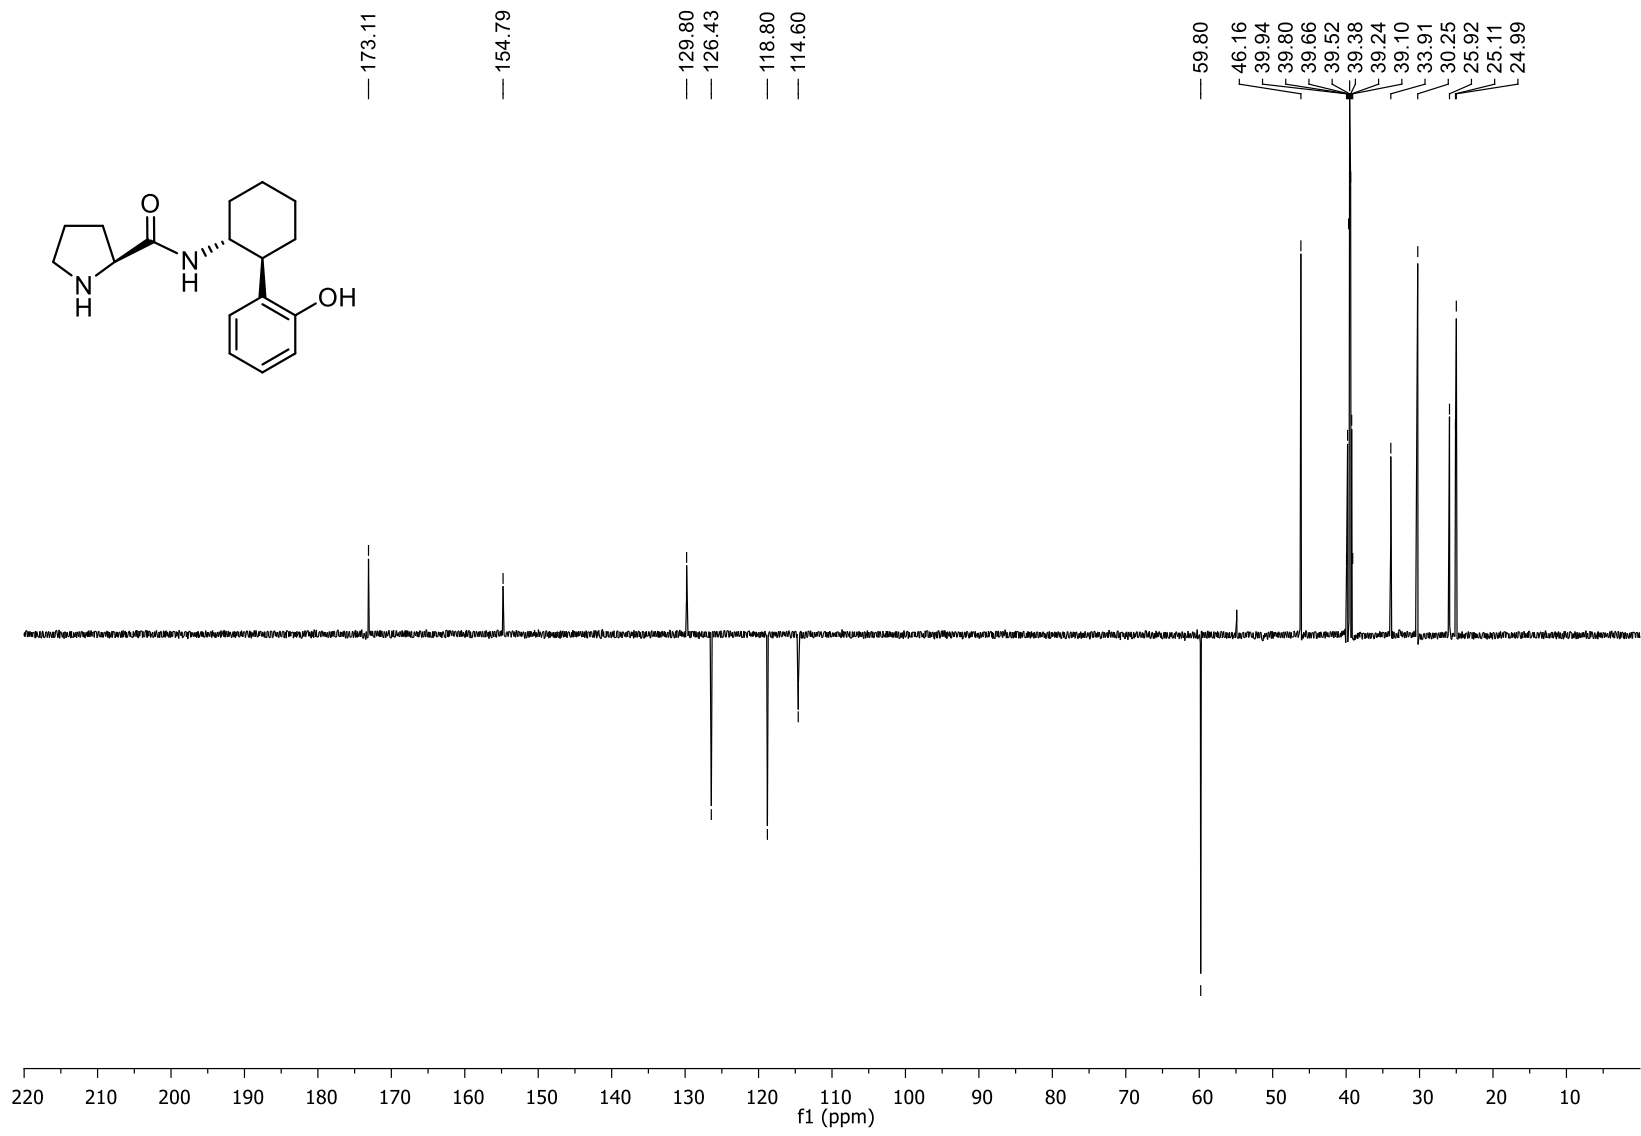

**$^{13}\text{C}\{^1\text{H}\}$  NMR Spectrum of (S,1R,2S)-32 (APT, 150 MHz, DMSO- $d_6$ )**

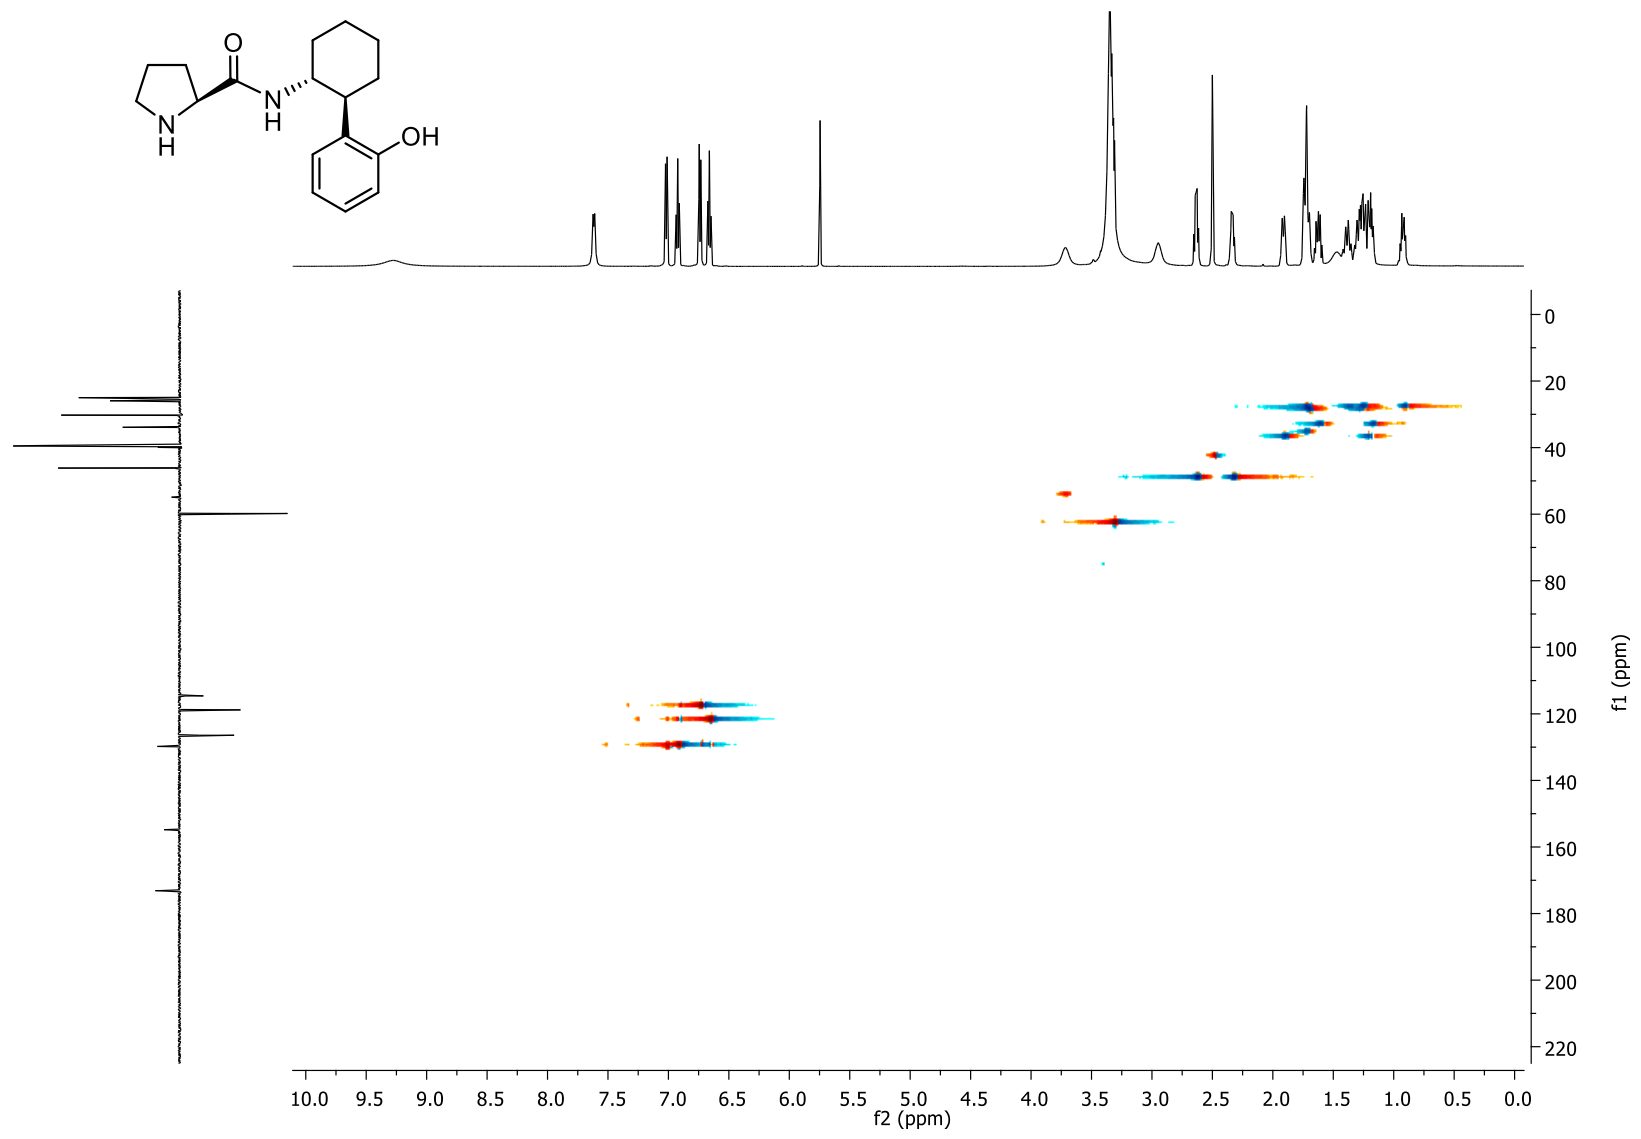

HSQC NMR Spectrum of (*S*,1*R*,2*S*)-32 (DMSO-*d*<sub>6</sub>)

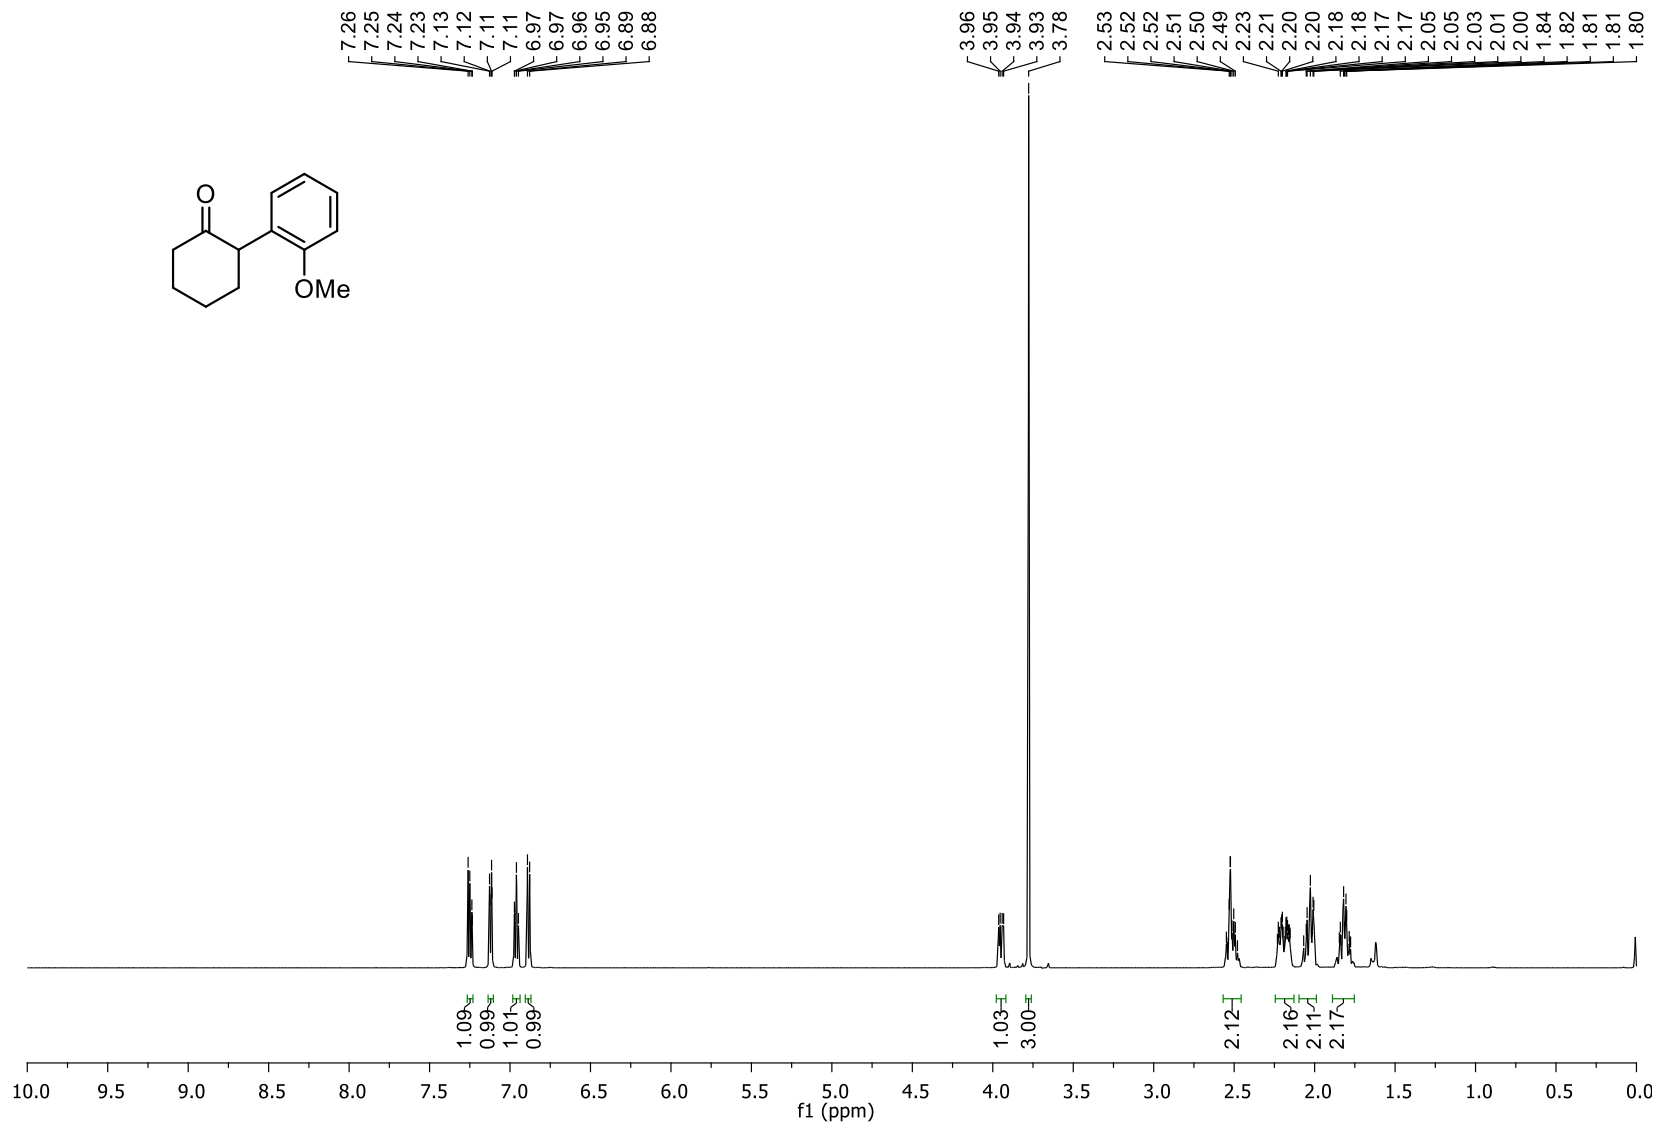

**<sup>1</sup>H NMR Spectrum of (±)-35 (600 MHz, CDCl<sub>3</sub>)**

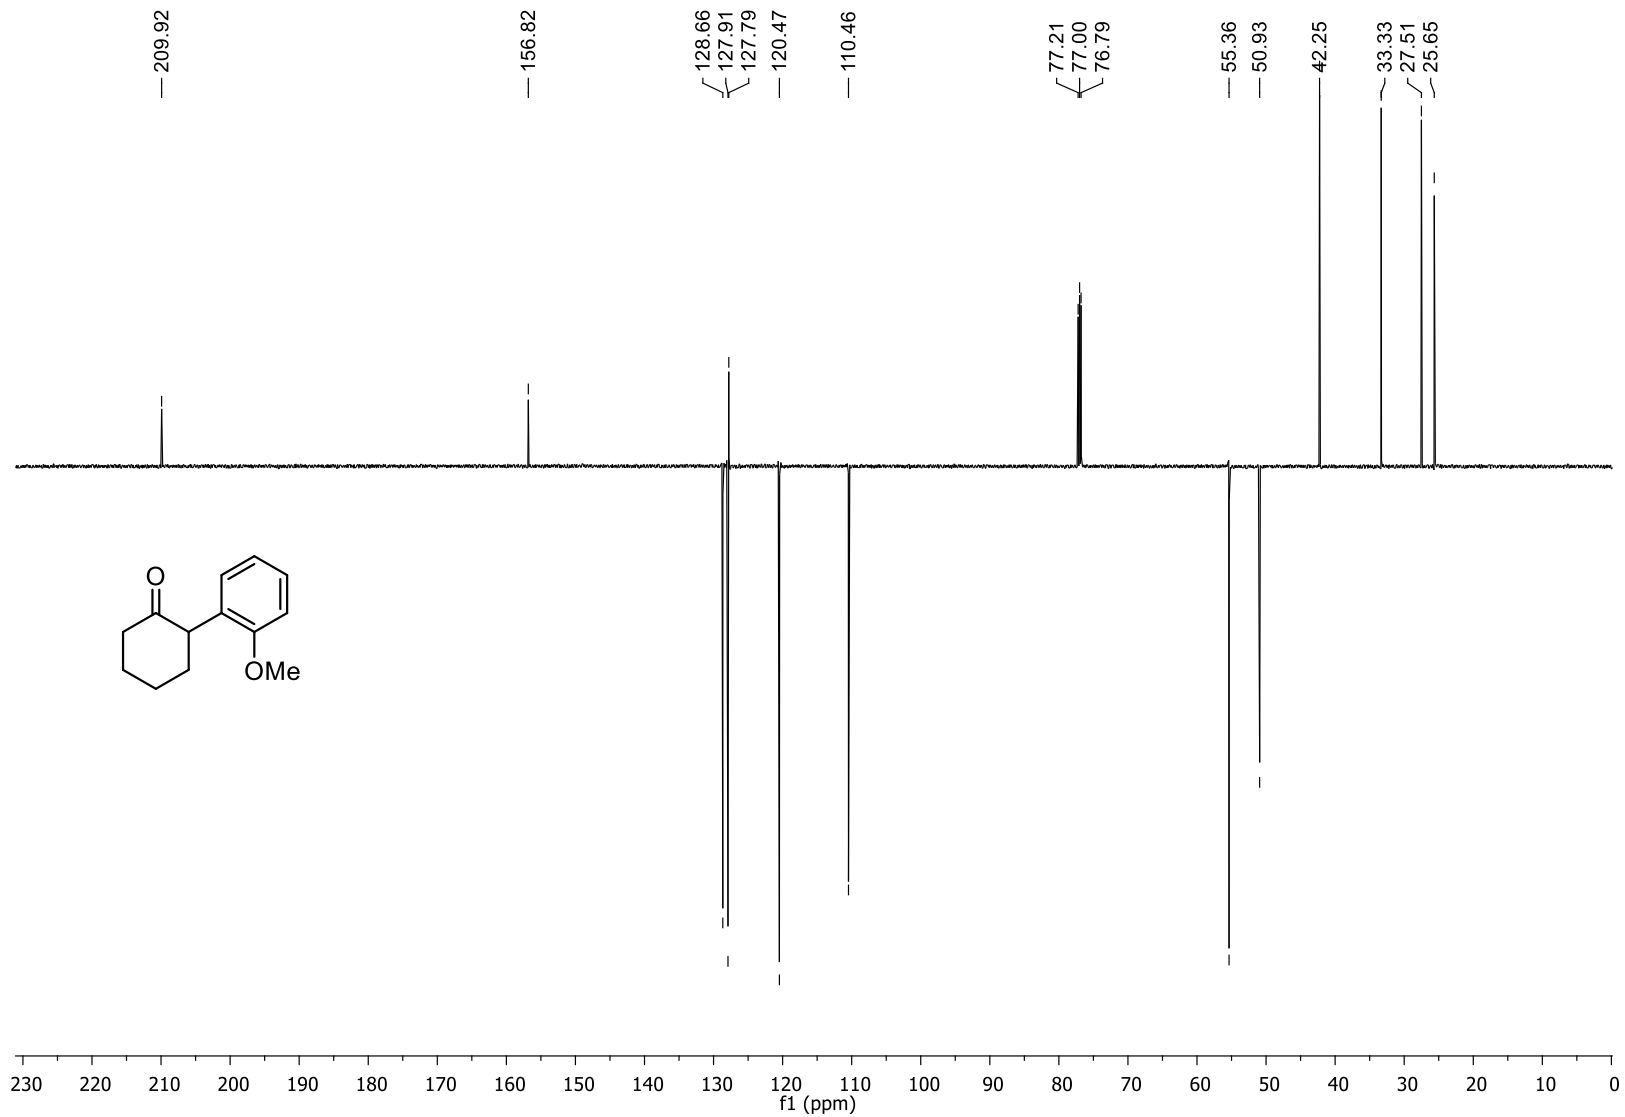

$^{13}\text{C}\{^1\text{H}\}$  NMR Spectrum of (±)-35 (APT, 150 MHz,  $\text{CDCl}_3$ )

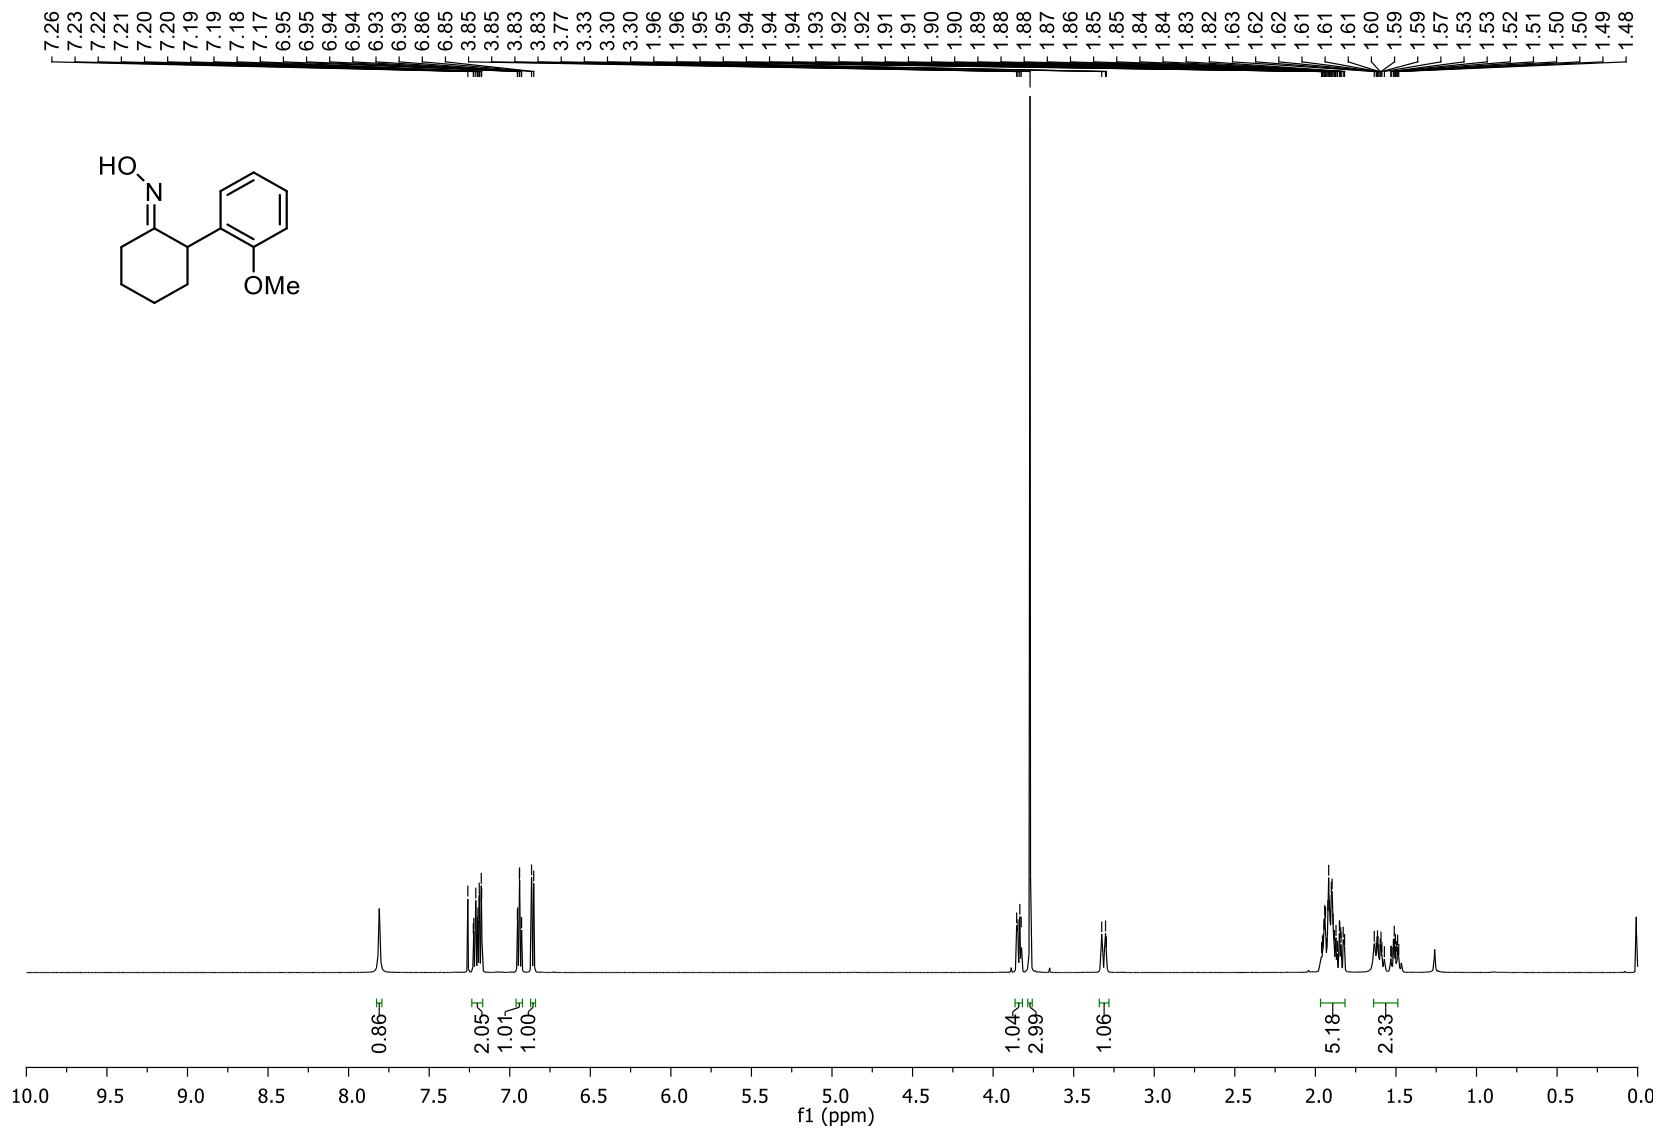

<sup>1</sup>H NMR Spectrum of (±)-36 (600 MHz, CDCl<sub>3</sub>)



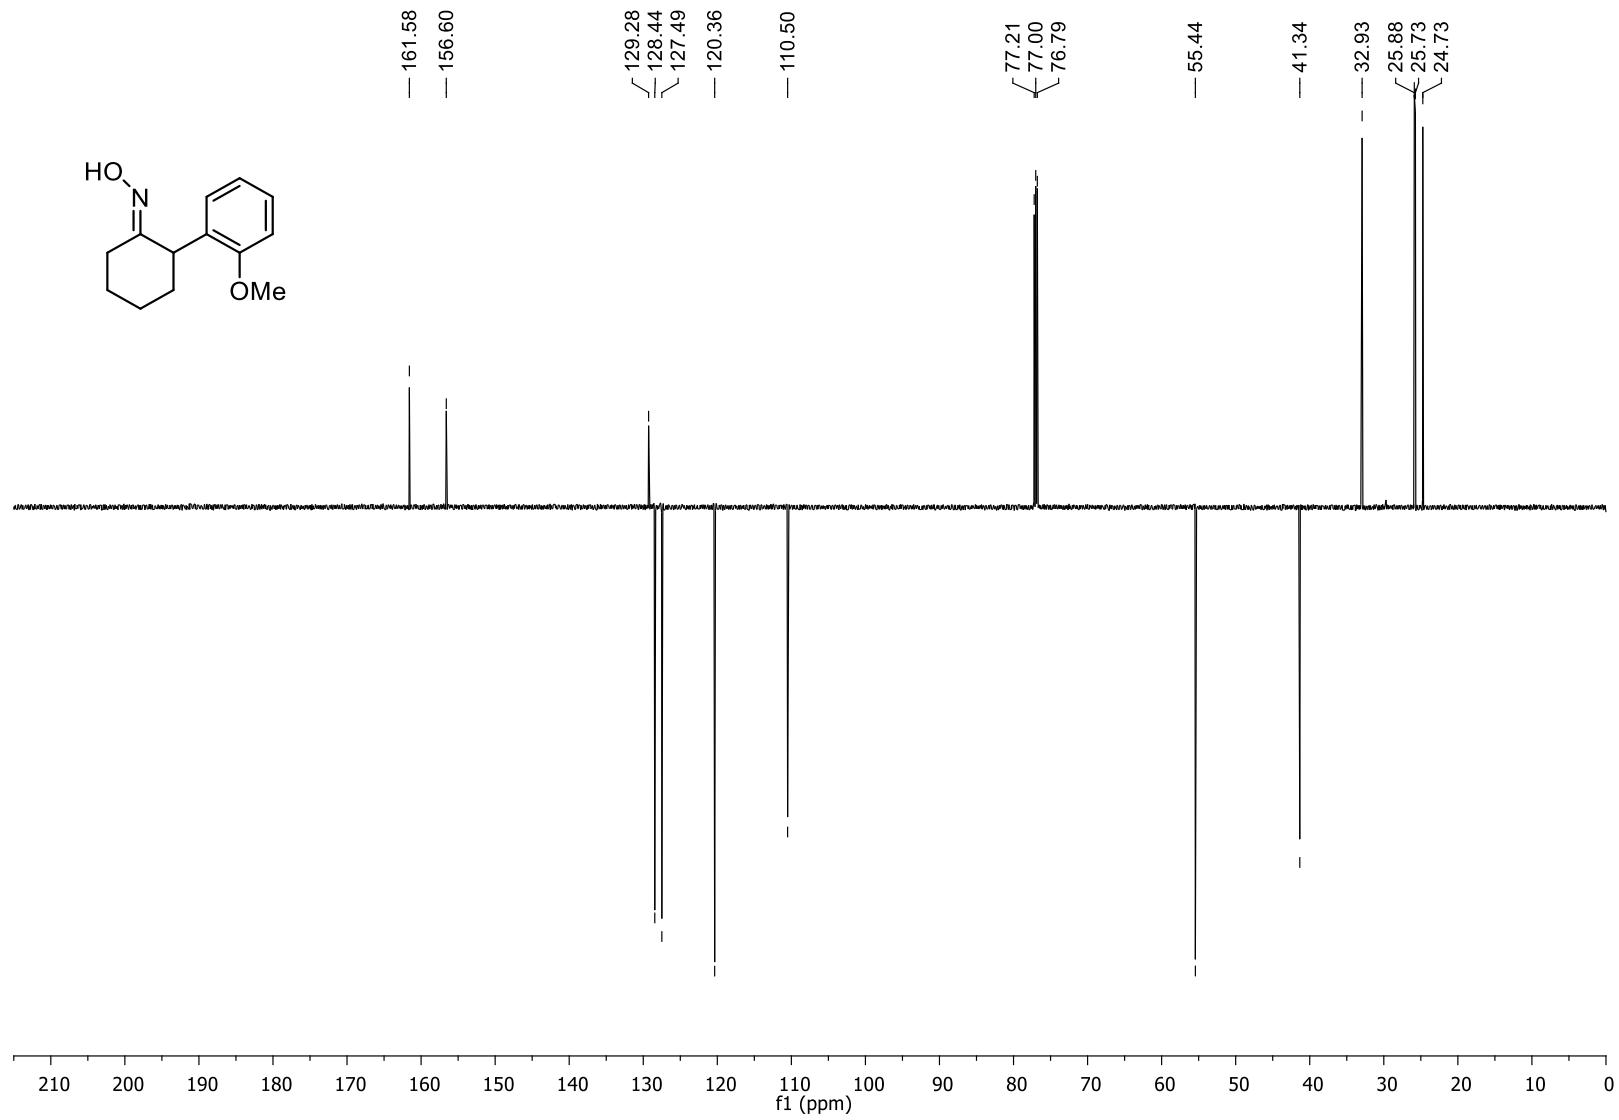

$^{13}\text{C}\{^1\text{H}\}$  NMR Spectrum of (±)-36 (APT, 150 MHz,  $\text{CDCl}_3$ )

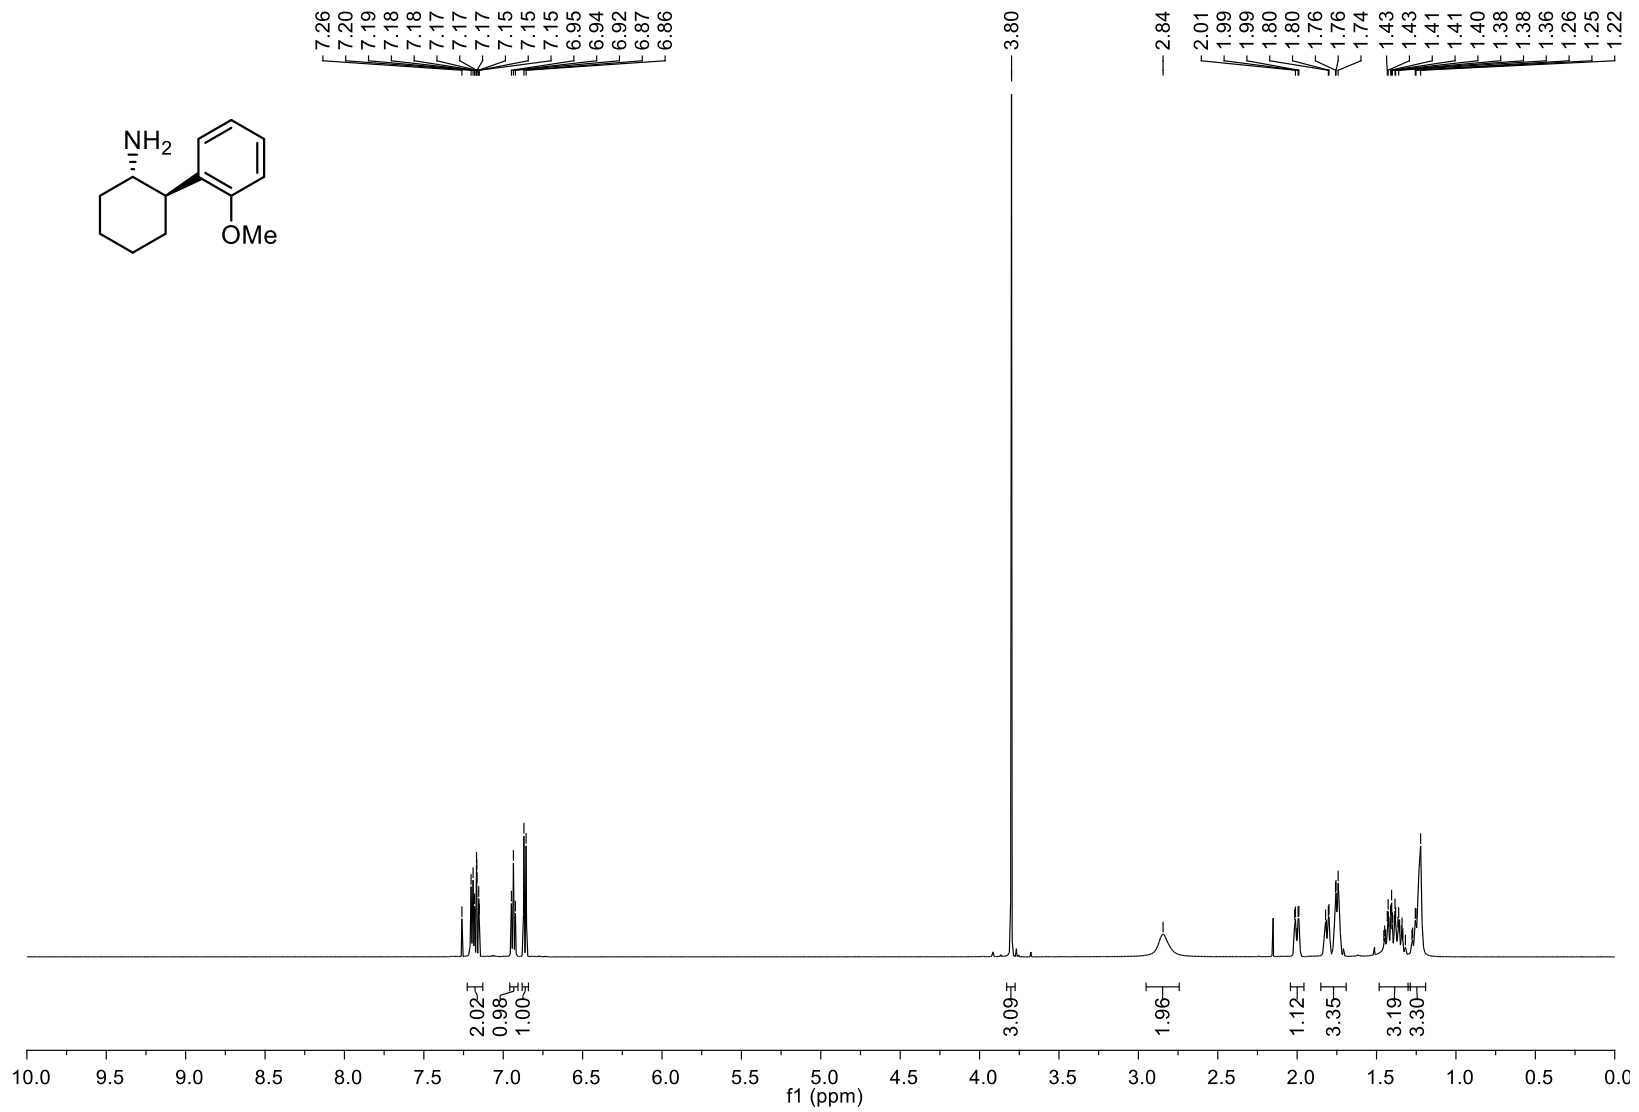

**<sup>1</sup>H NMR Spectrum of (±)-37 (600 MHz, CDCl<sub>3</sub>)**

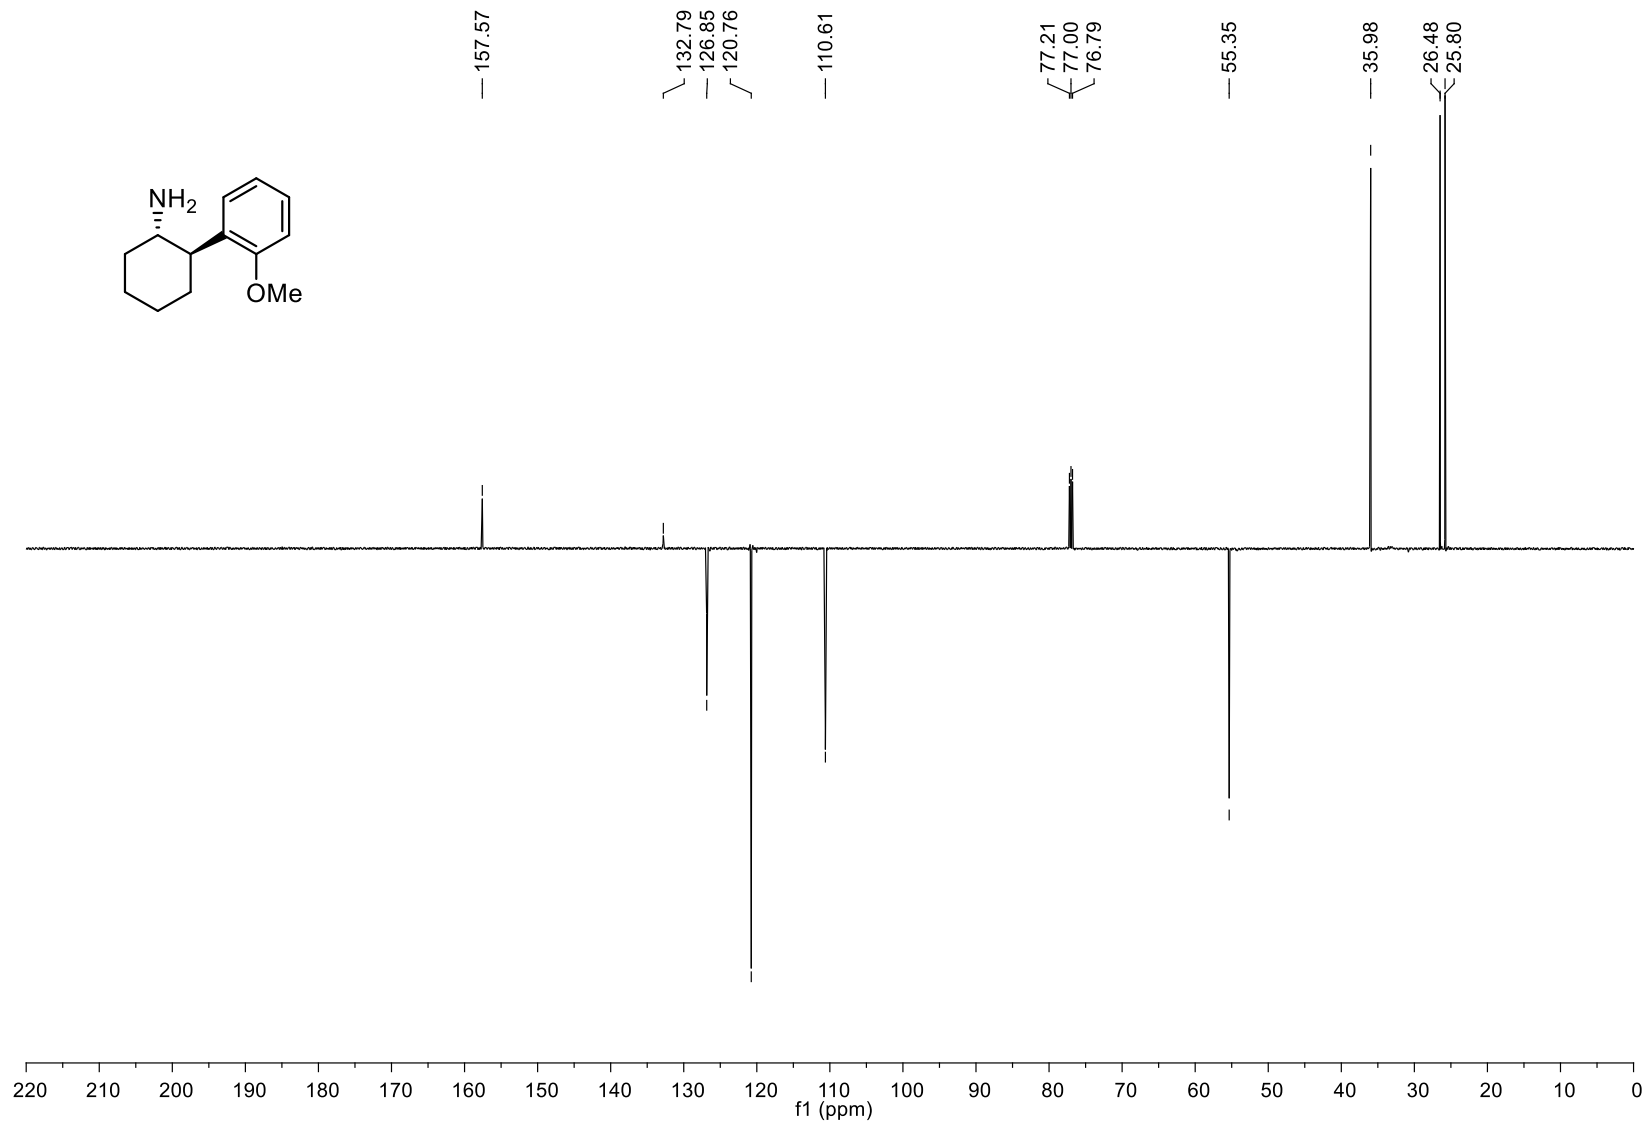

$^{13}\text{C}\{^1\text{H}\}$  NMR Spectrum of (±)-37 (APT, 150 MHz,  $\text{CDCl}_3$ )

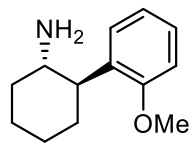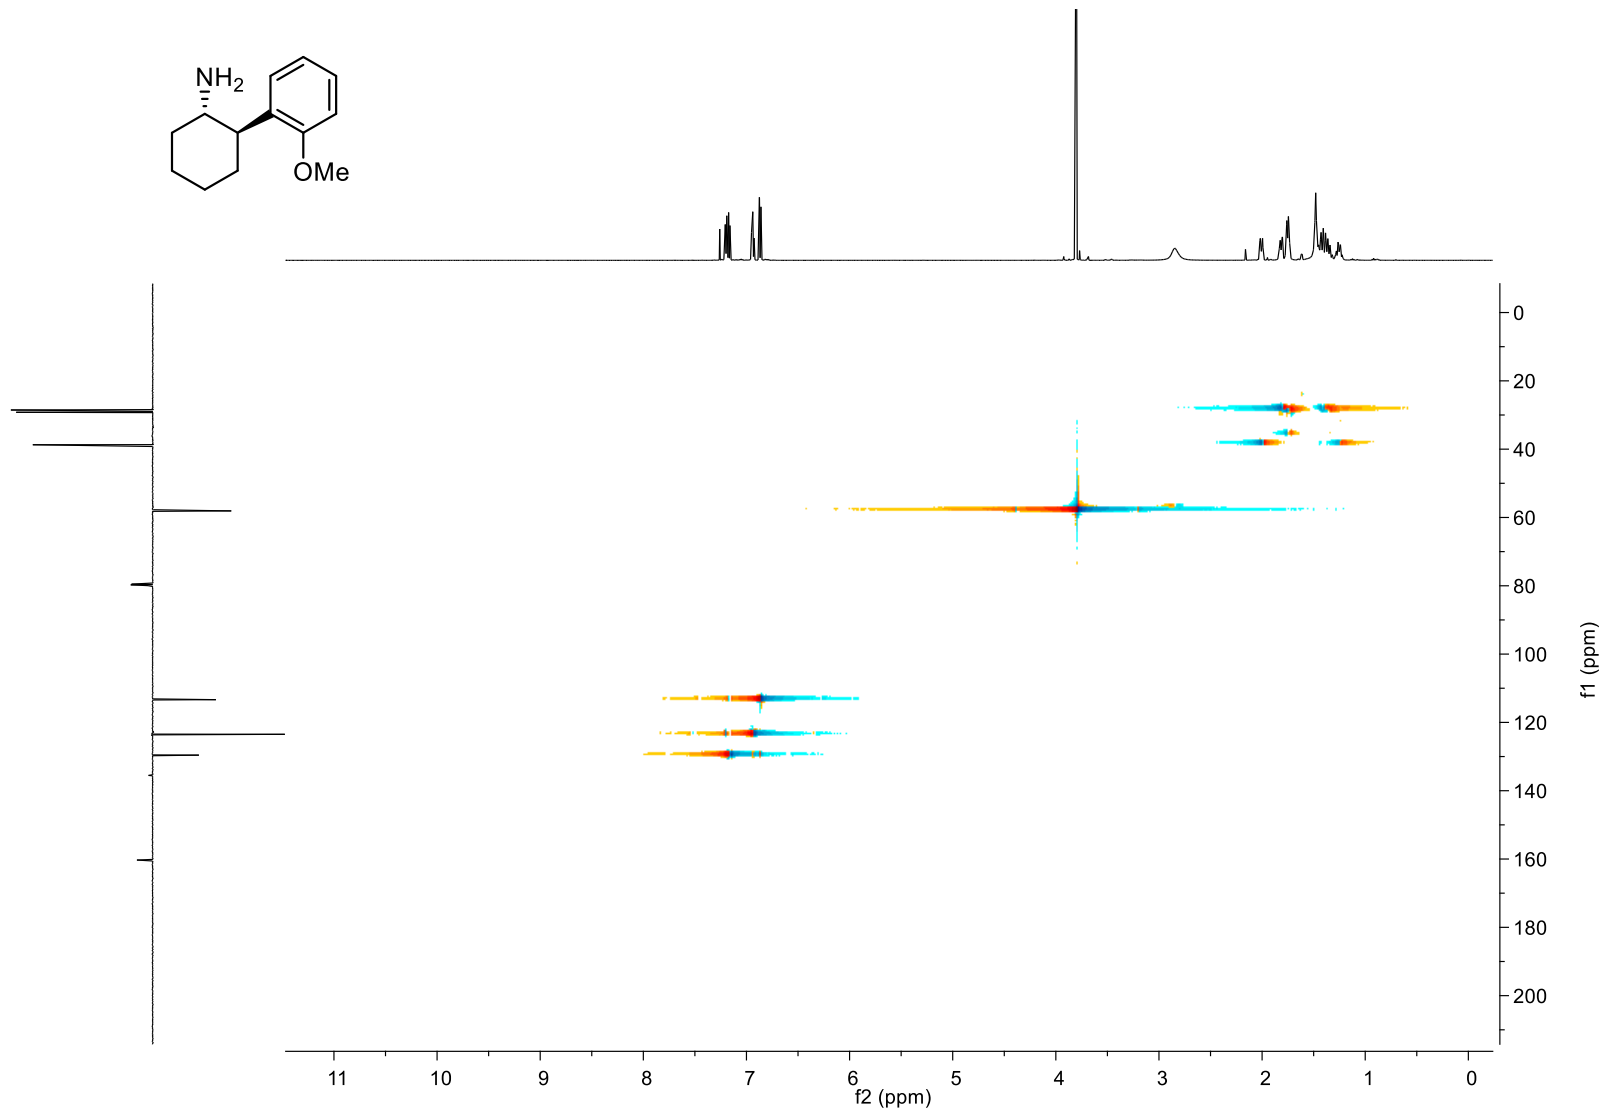

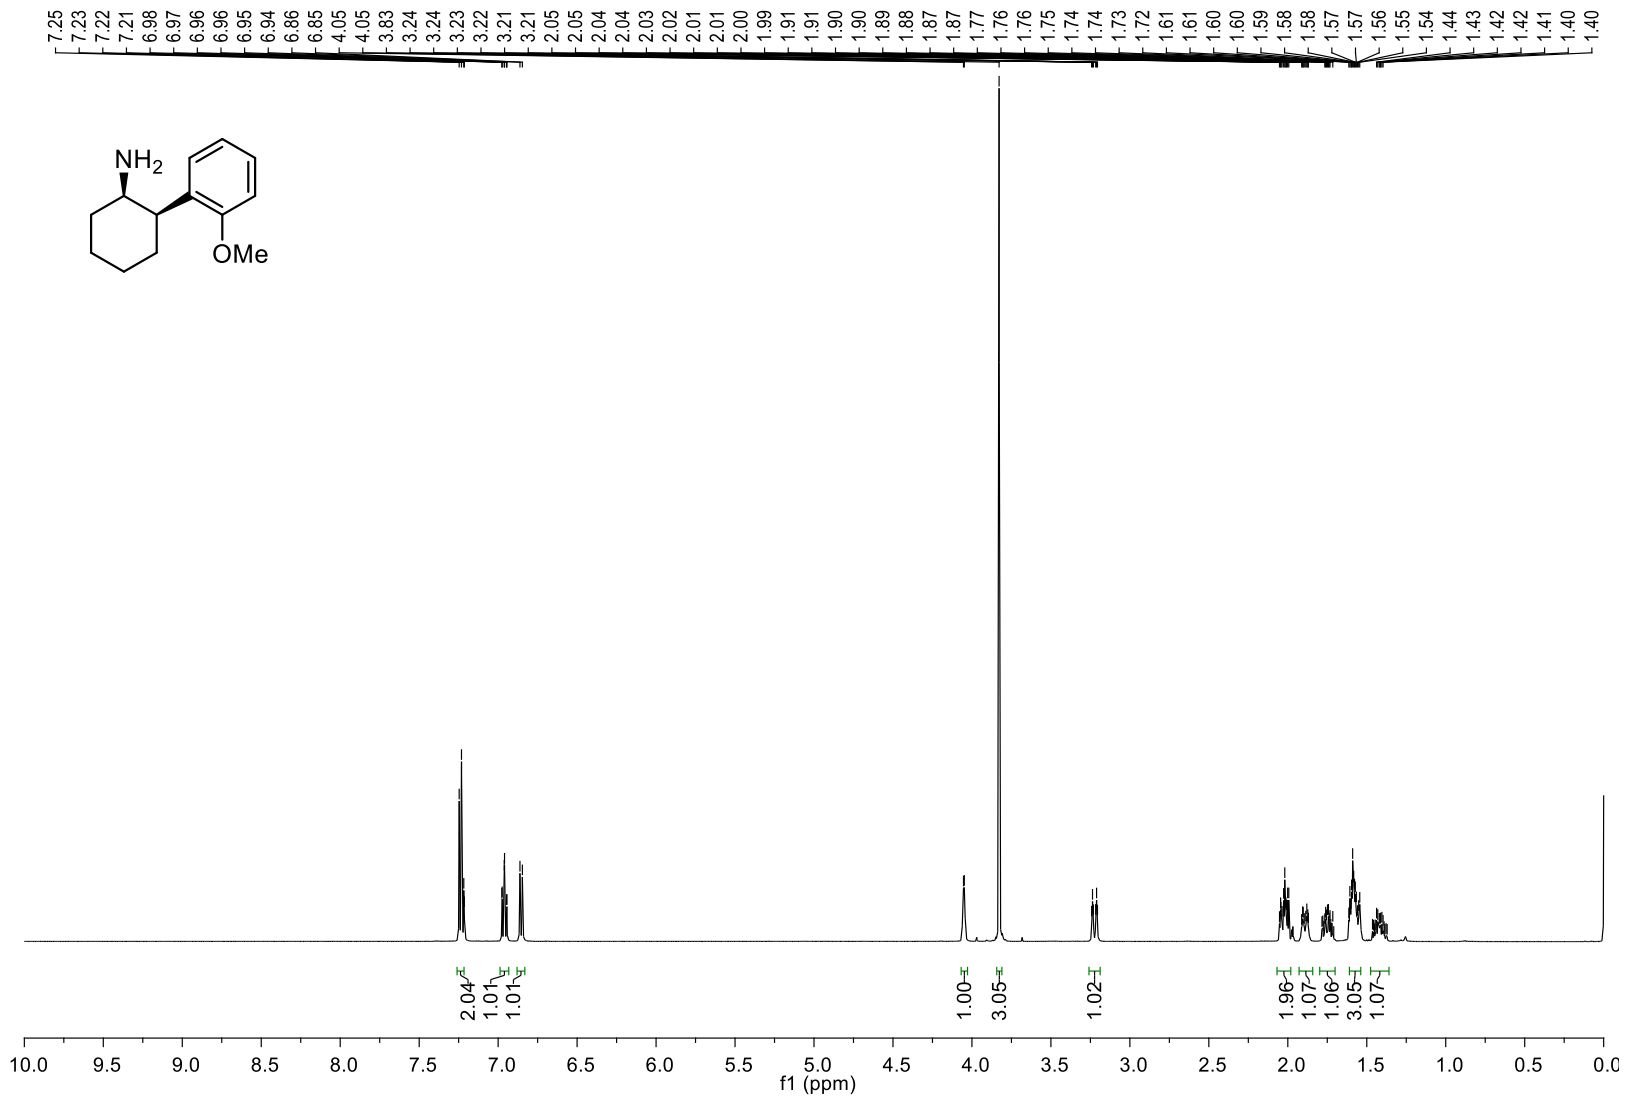

**<sup>1</sup>H NMR Spectrum of (±)-20 (500 MHz, CDCl<sub>3</sub>)**

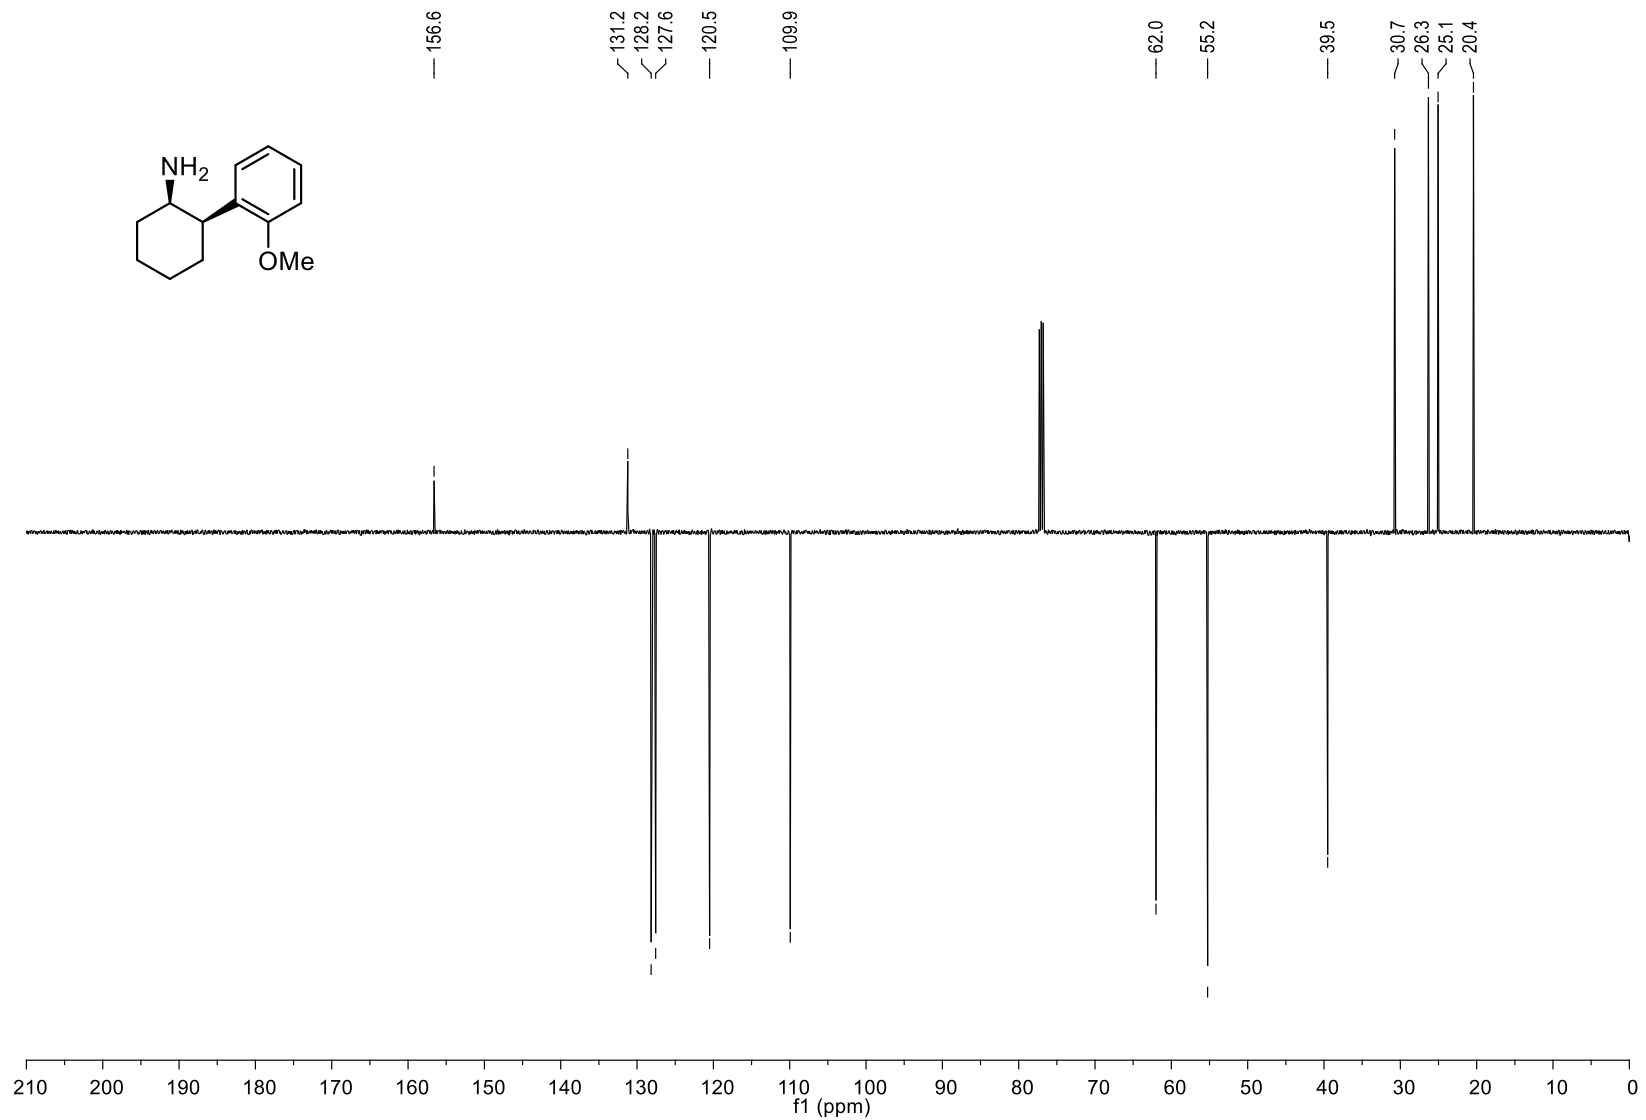

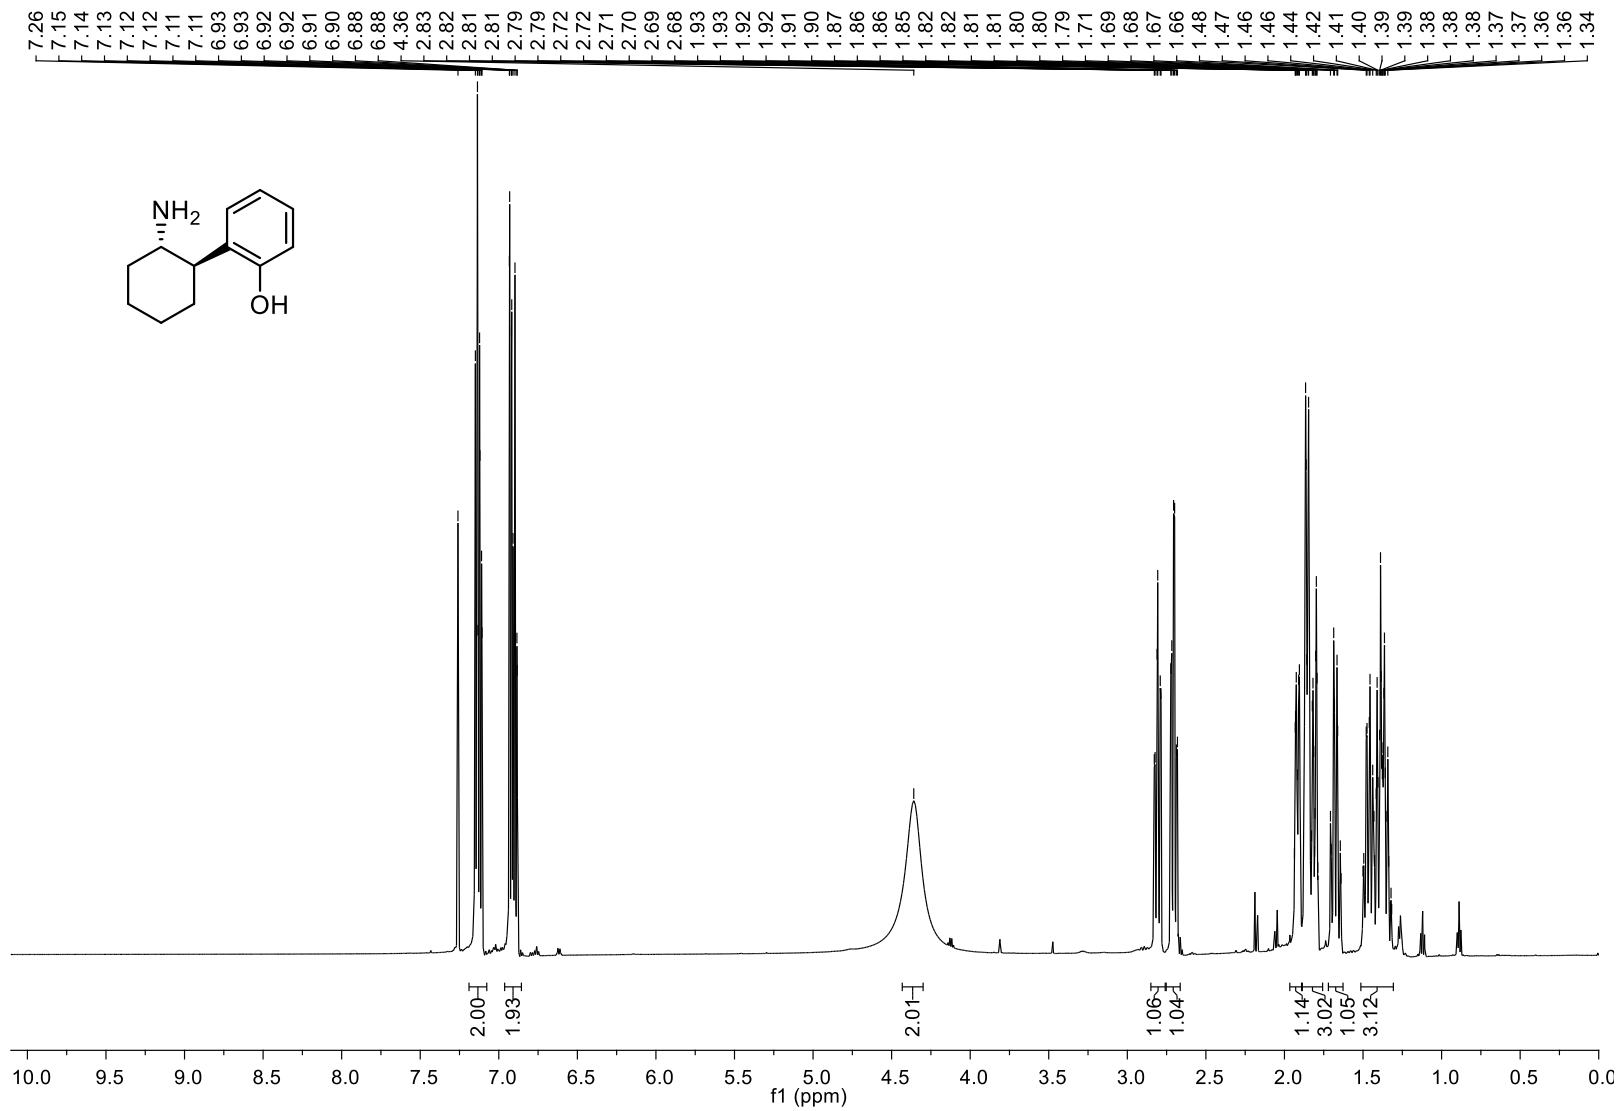

<sup>1</sup>H NMR Spectrum of (±)-18 (600 MHz, CDCl<sub>3</sub>)

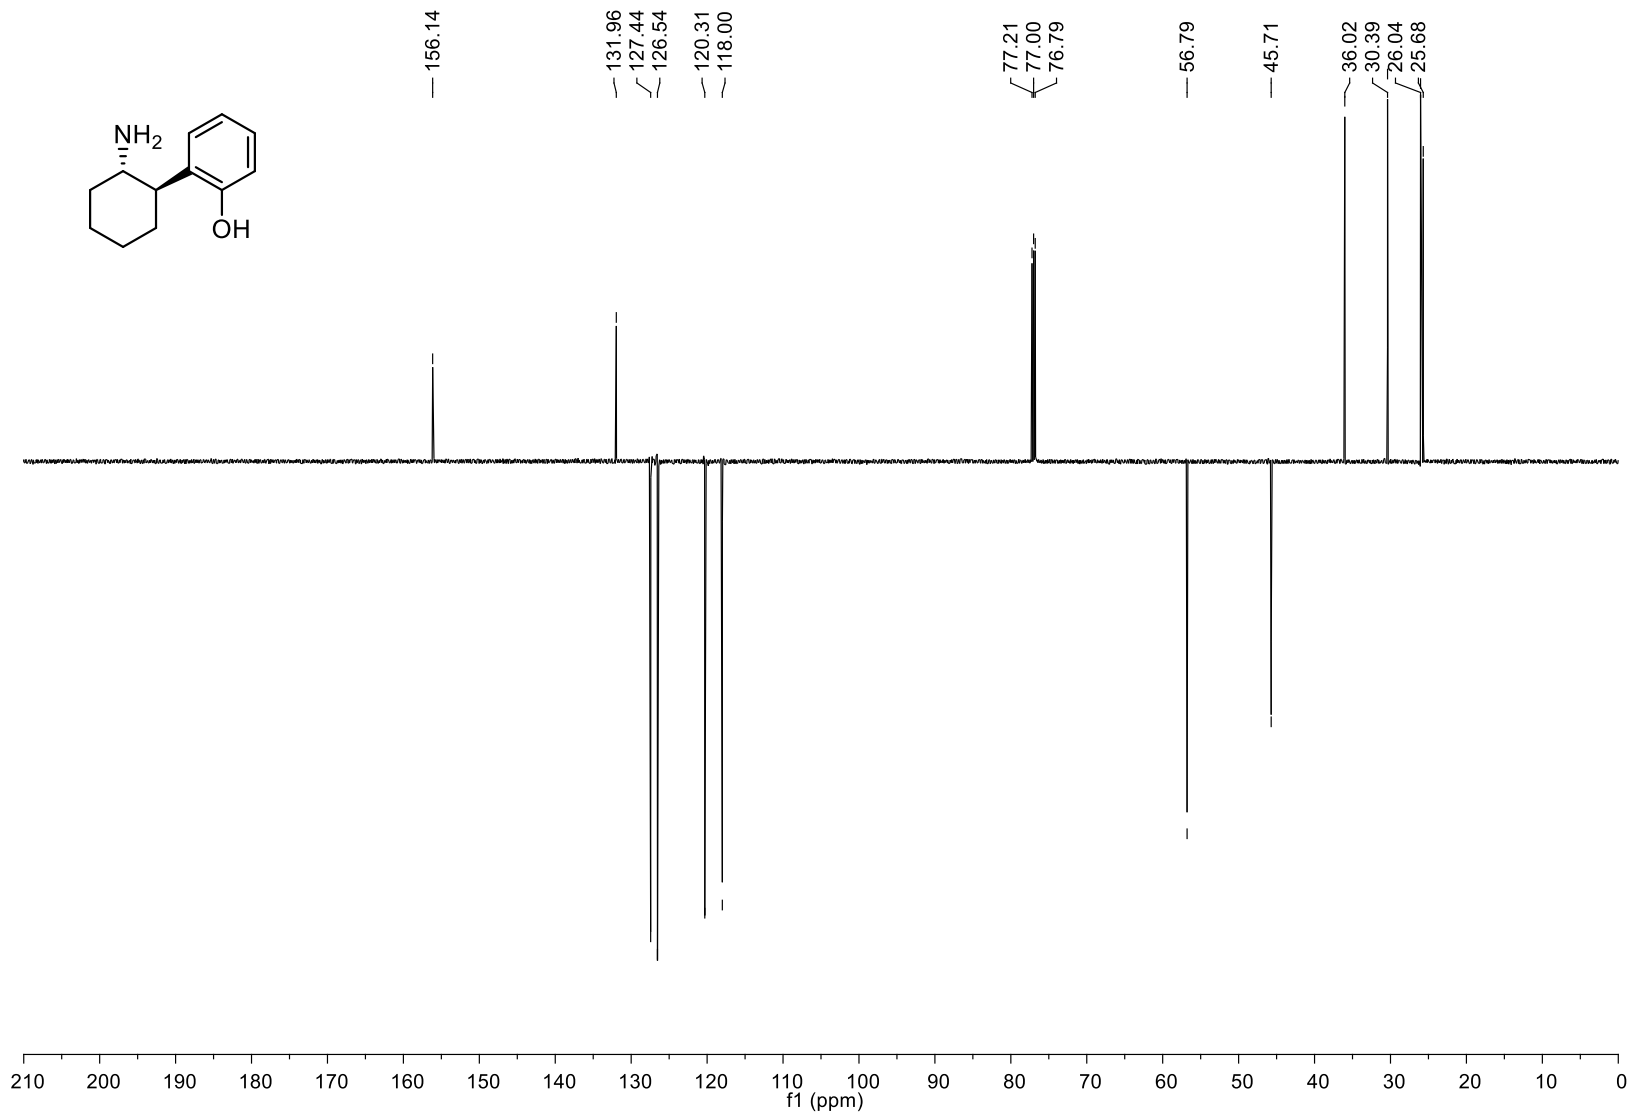



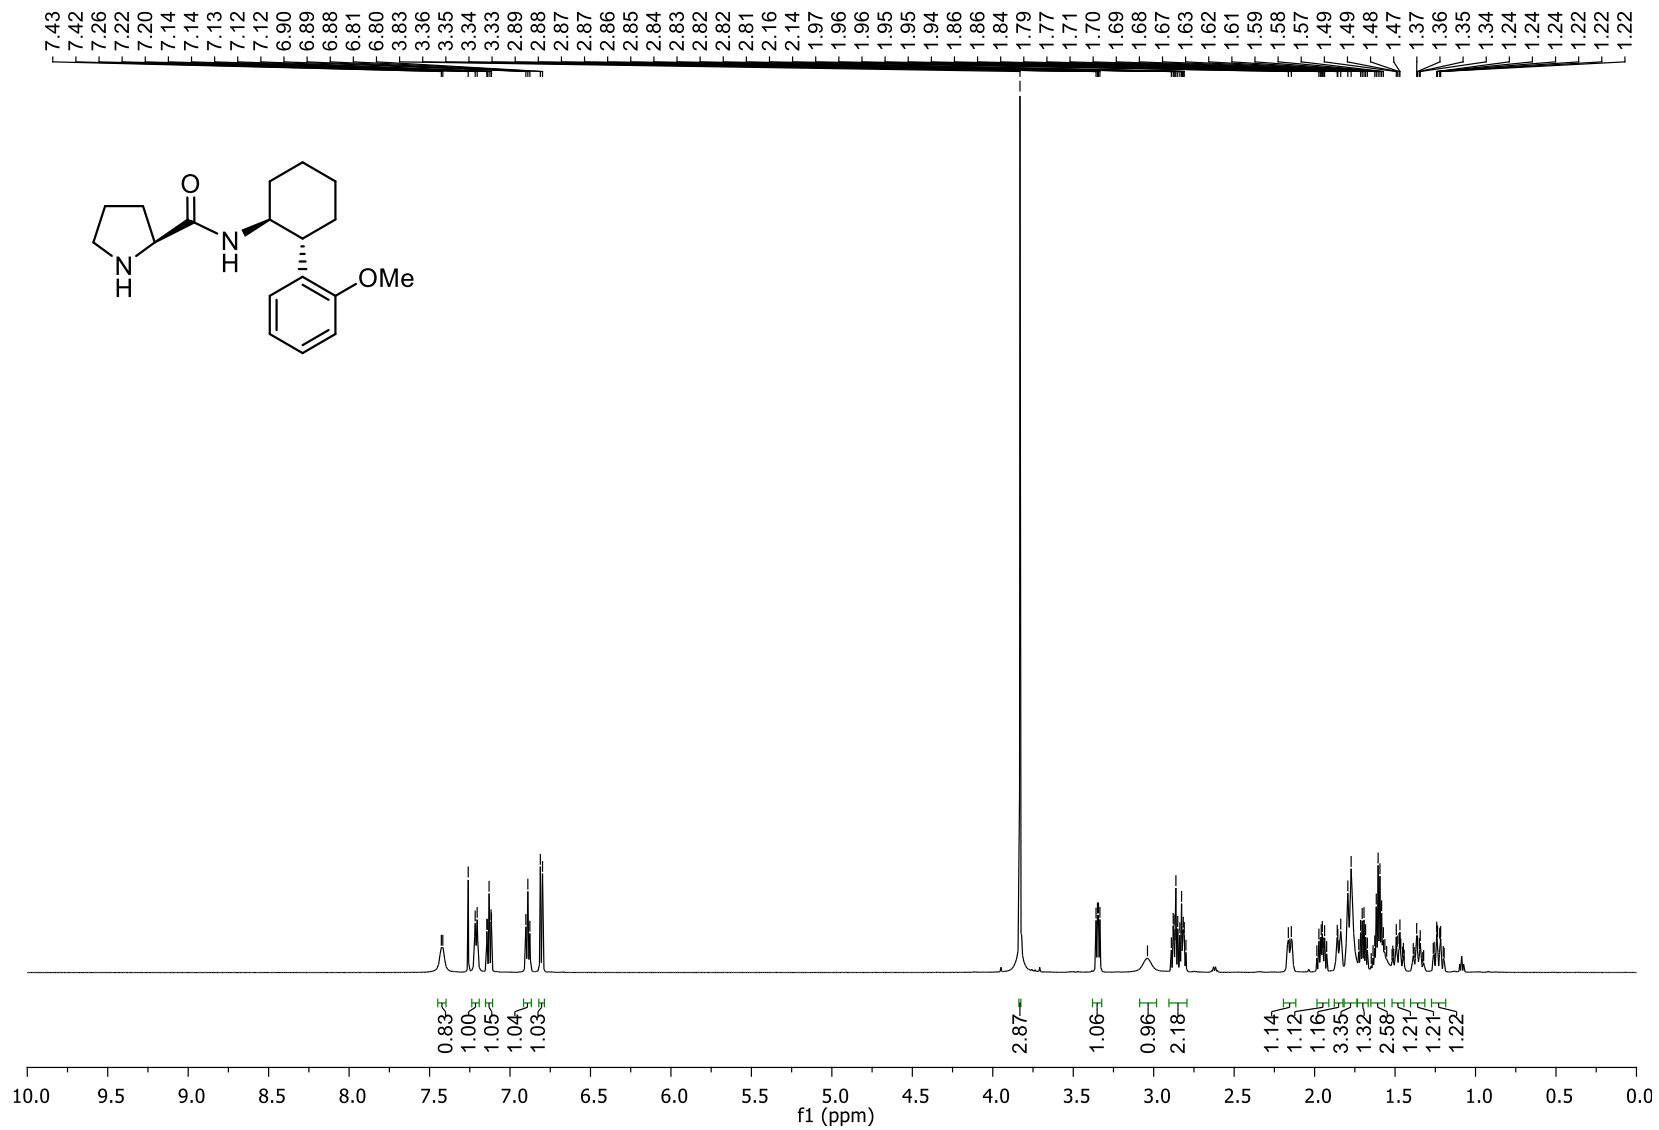

**<sup>1</sup>H NMR Spectrum of (S,1S,2R)-43 (600 MHz, CDCl<sub>3</sub>)**

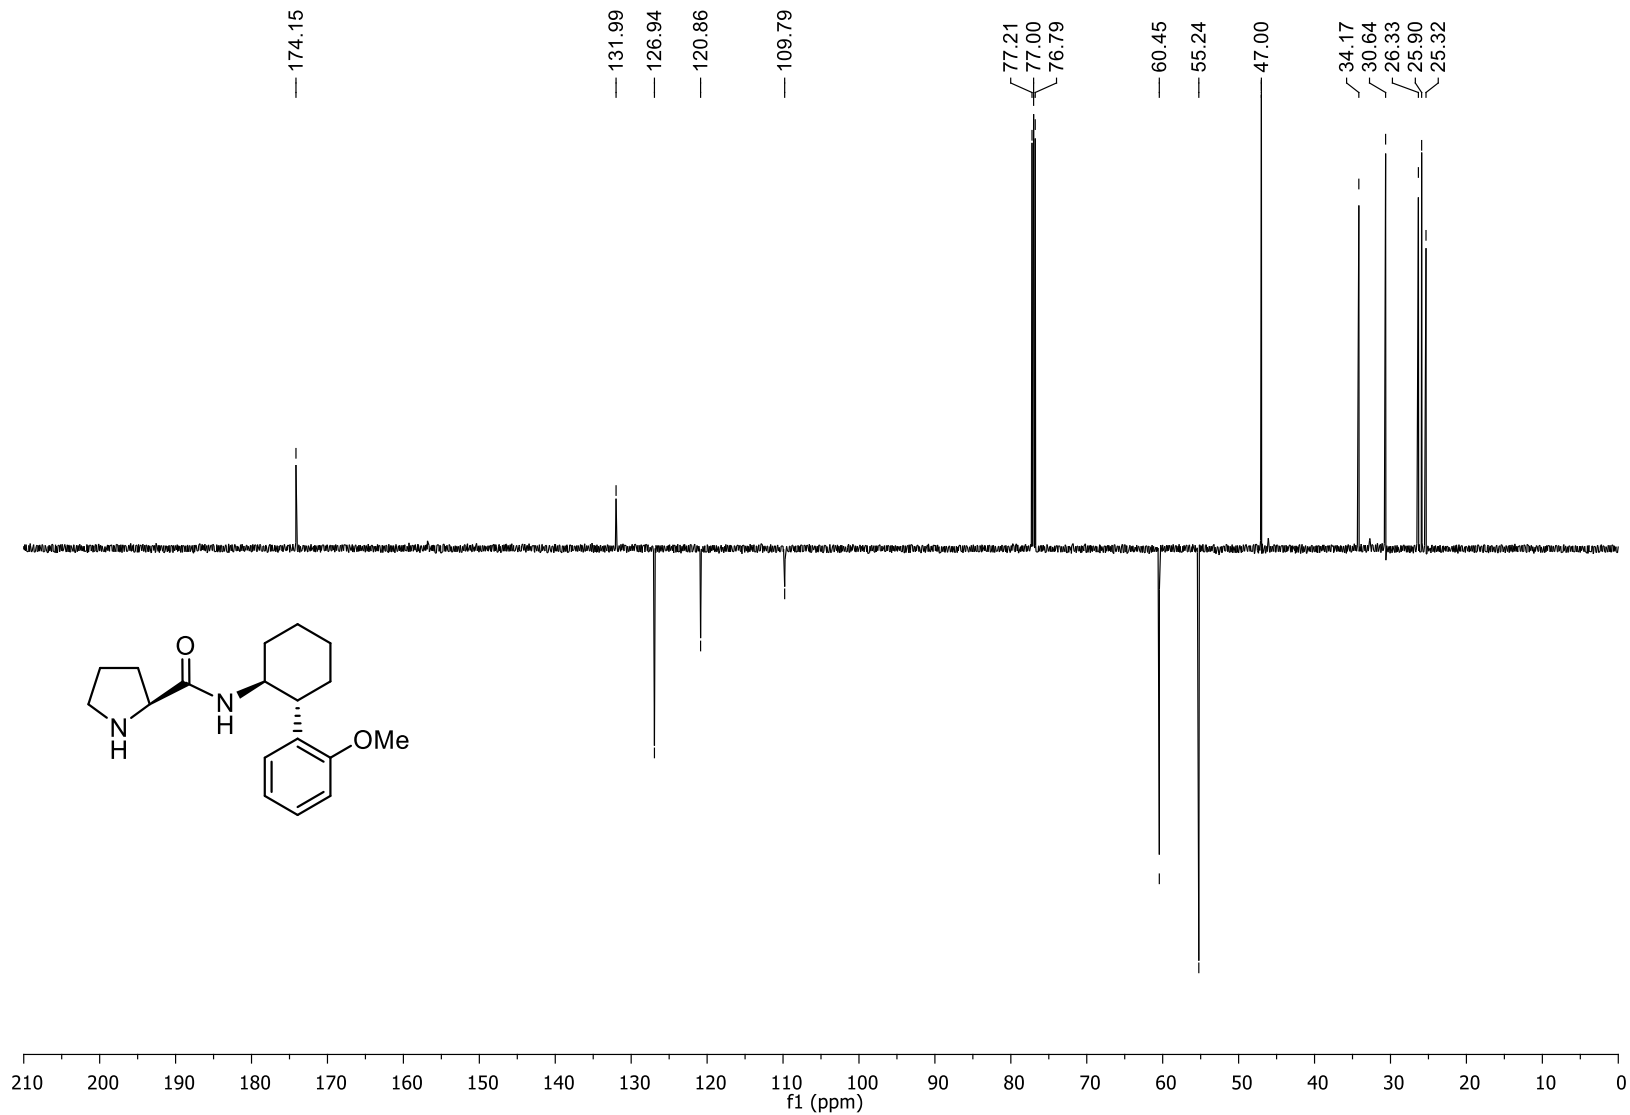

$^{13}\text{C}\{^1\text{H}\}$  NMR Spectrum of (S,1S,2R)-43 (APT, 150 MHz,  $\text{CDCl}_3$ )

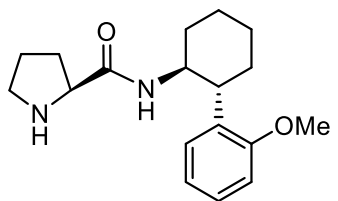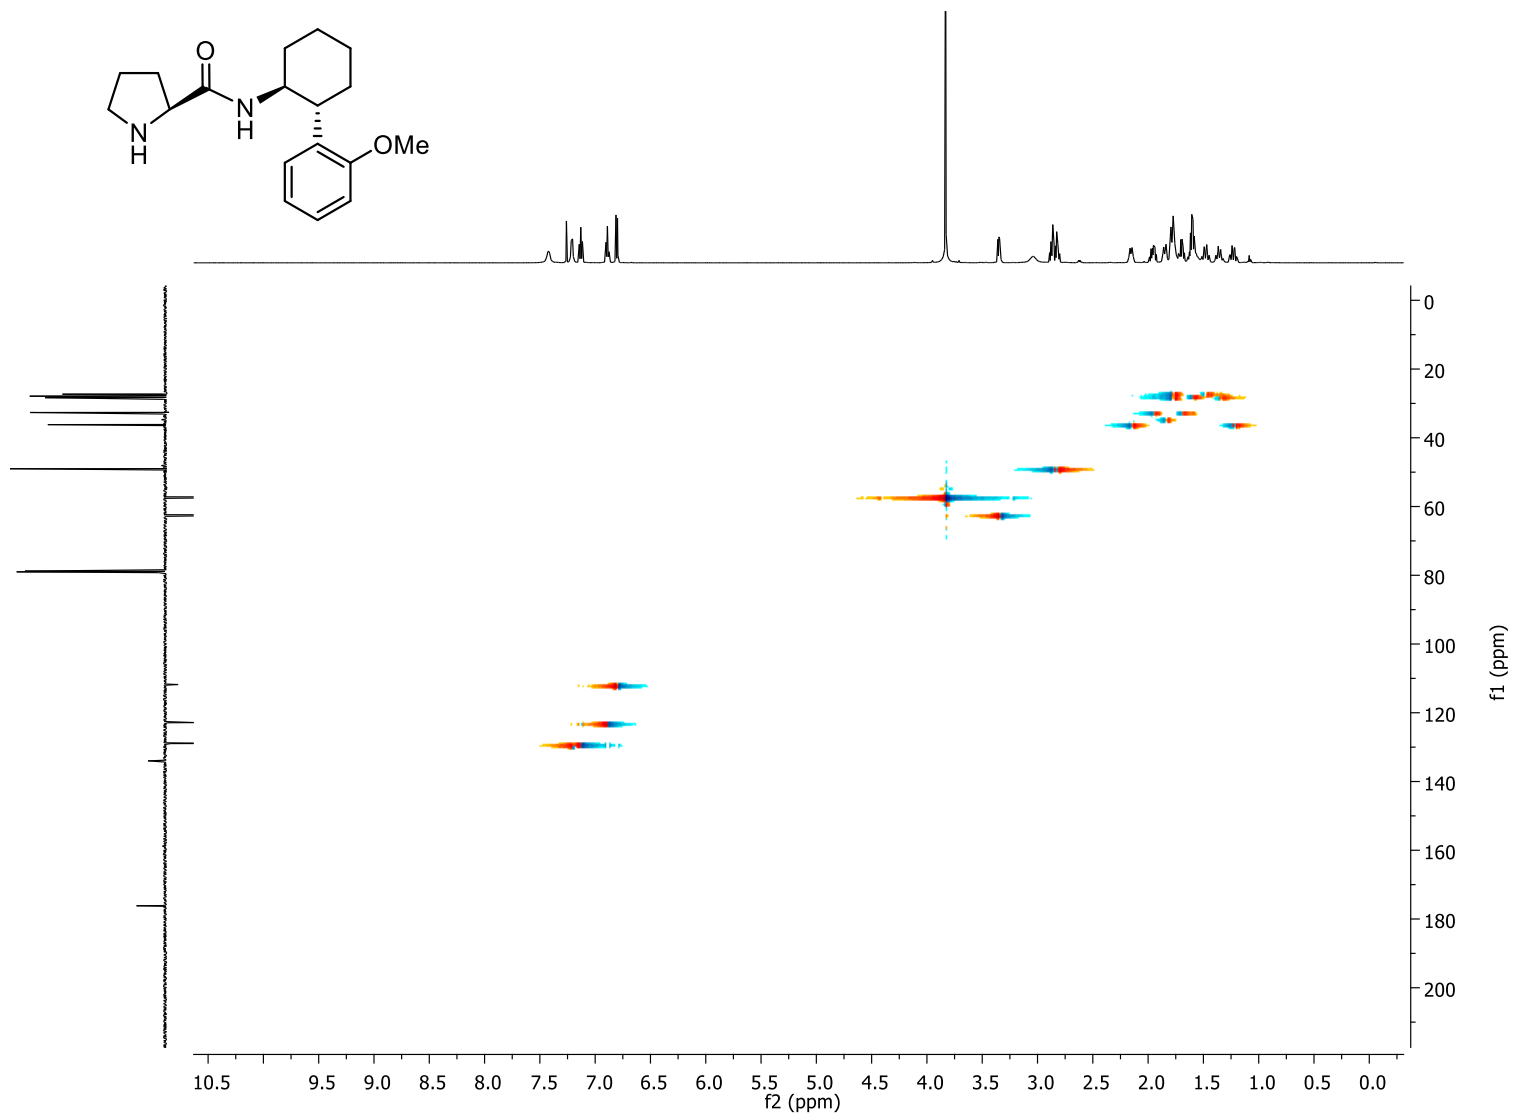

HSQC NMR Spectrum of (S,1S,2R)-43 (CDCl<sub>3</sub>)

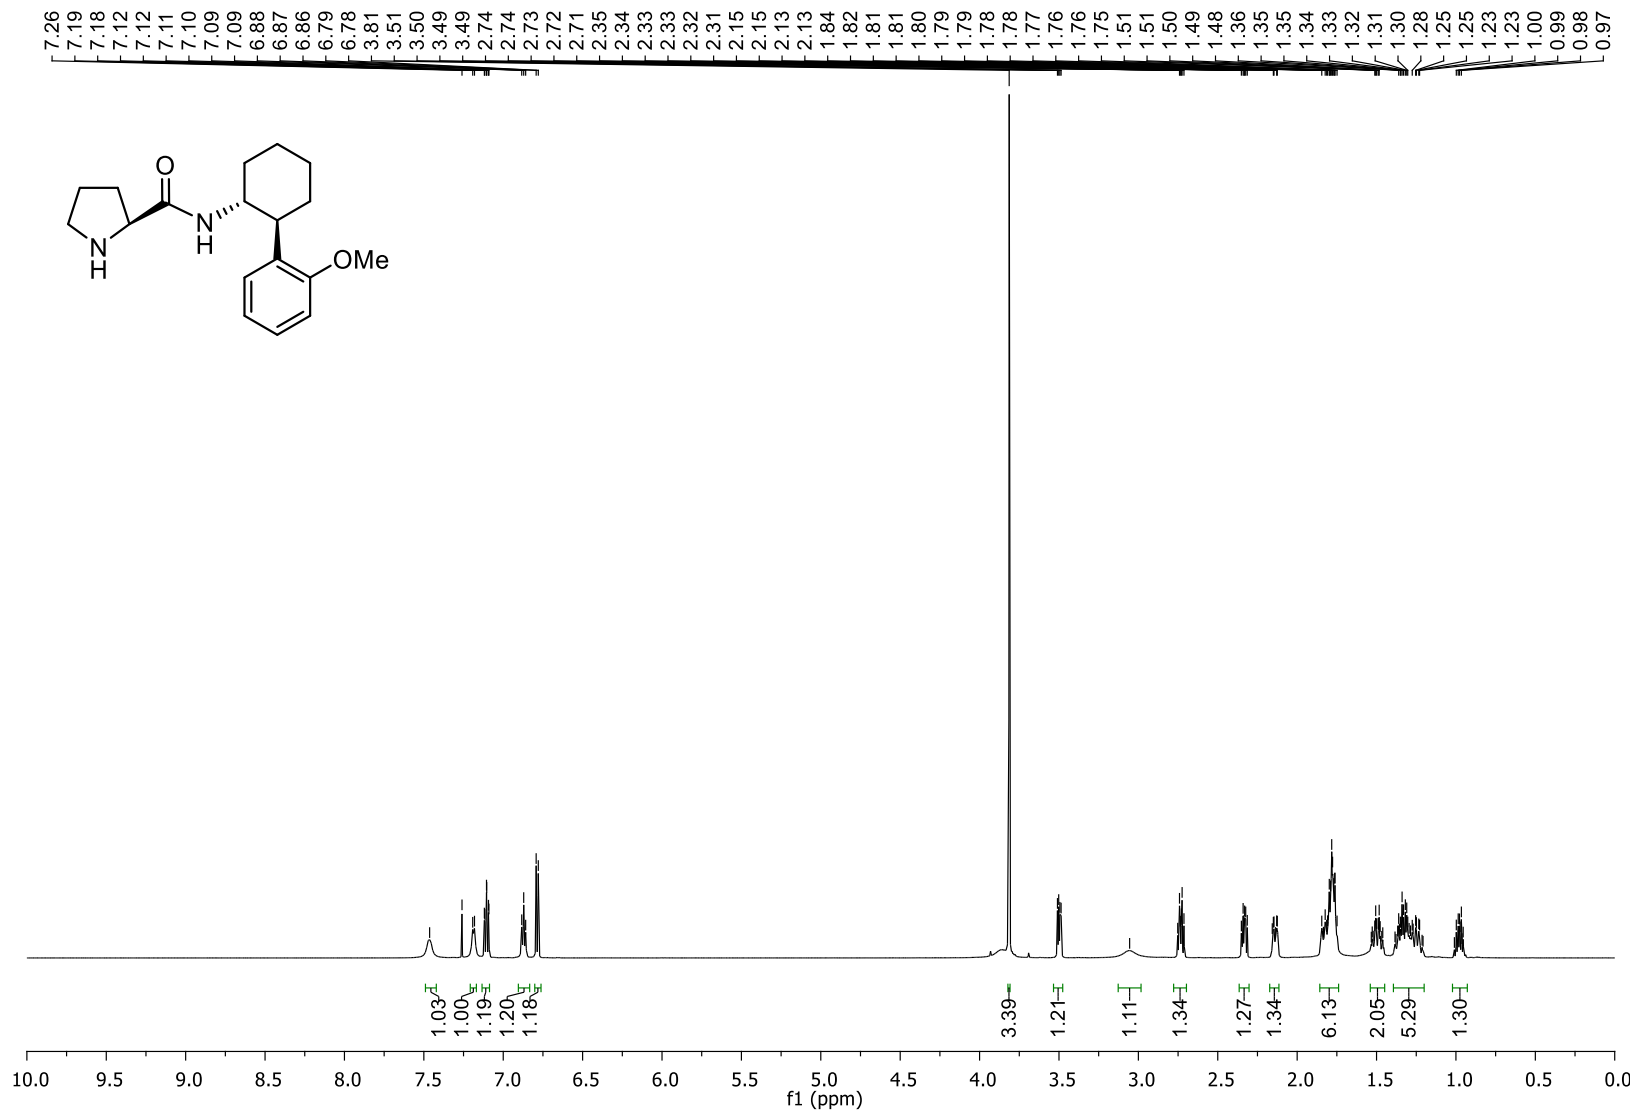

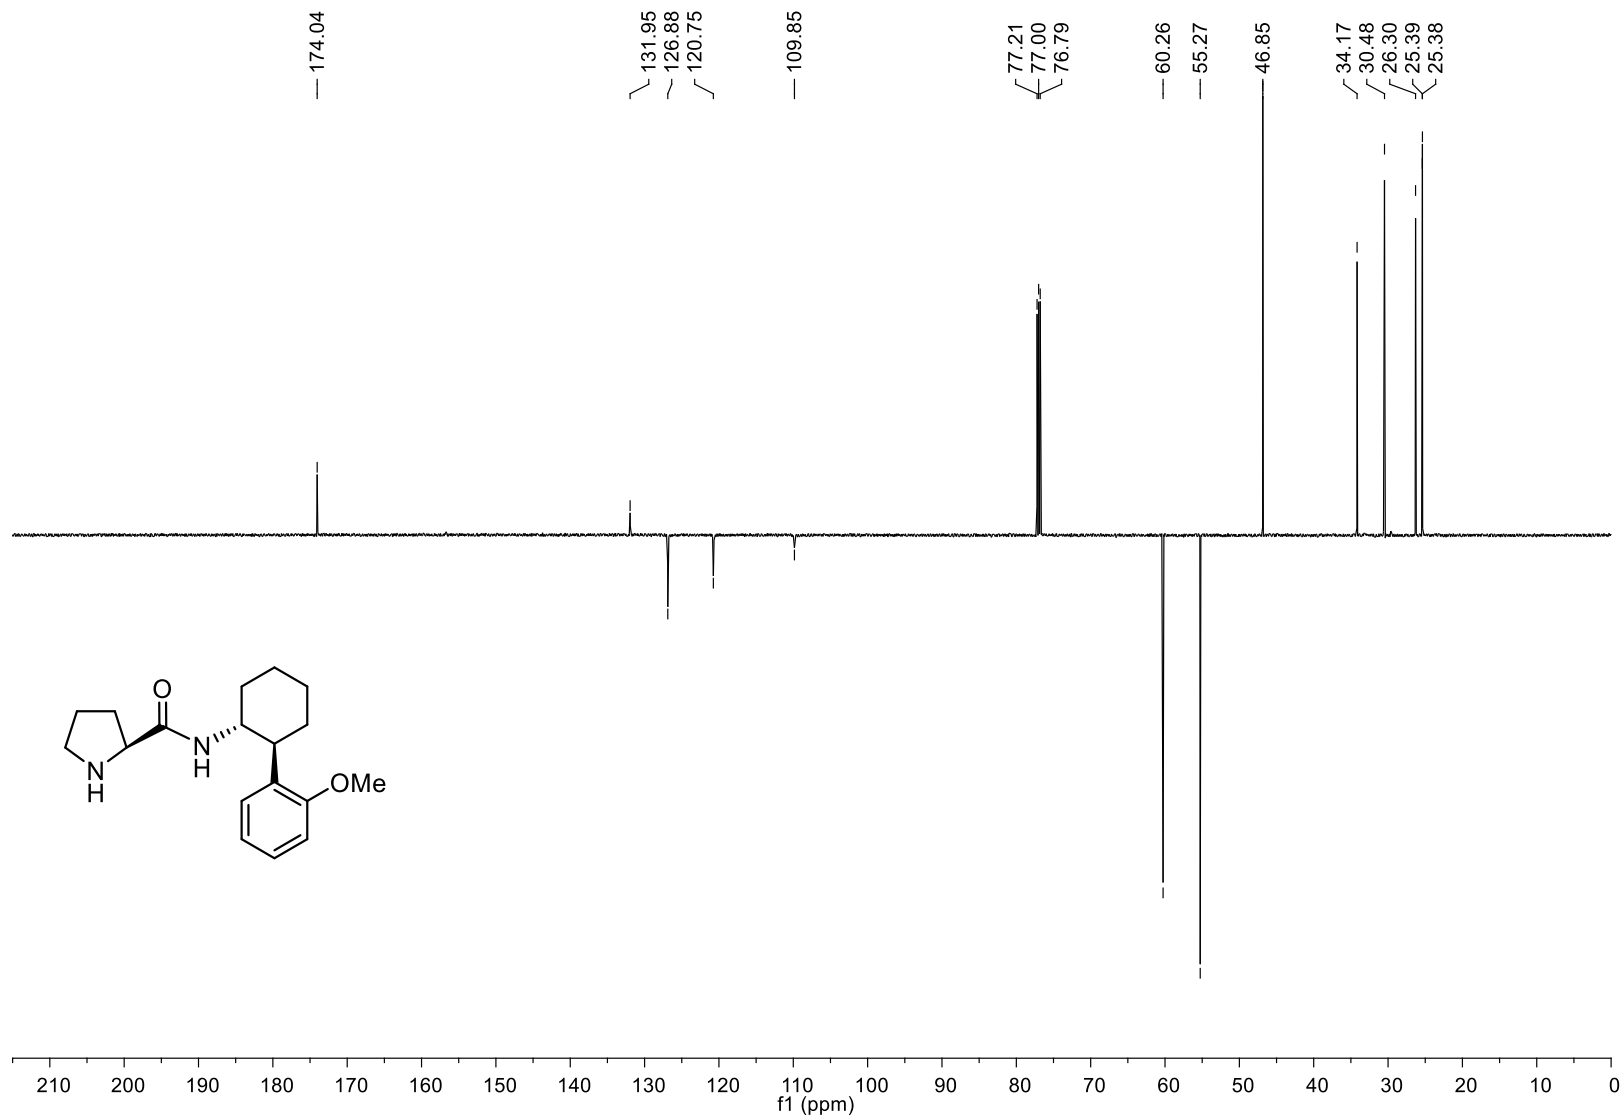

$^{13}\text{C}\{^1\text{H}\}$  NMR Spectrum of (S,1R,2S)-44 (APT, 150 MHz,  $\text{CDCl}_3$ )

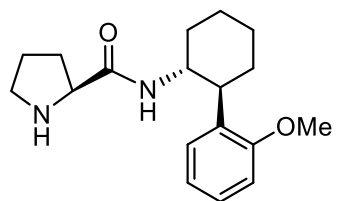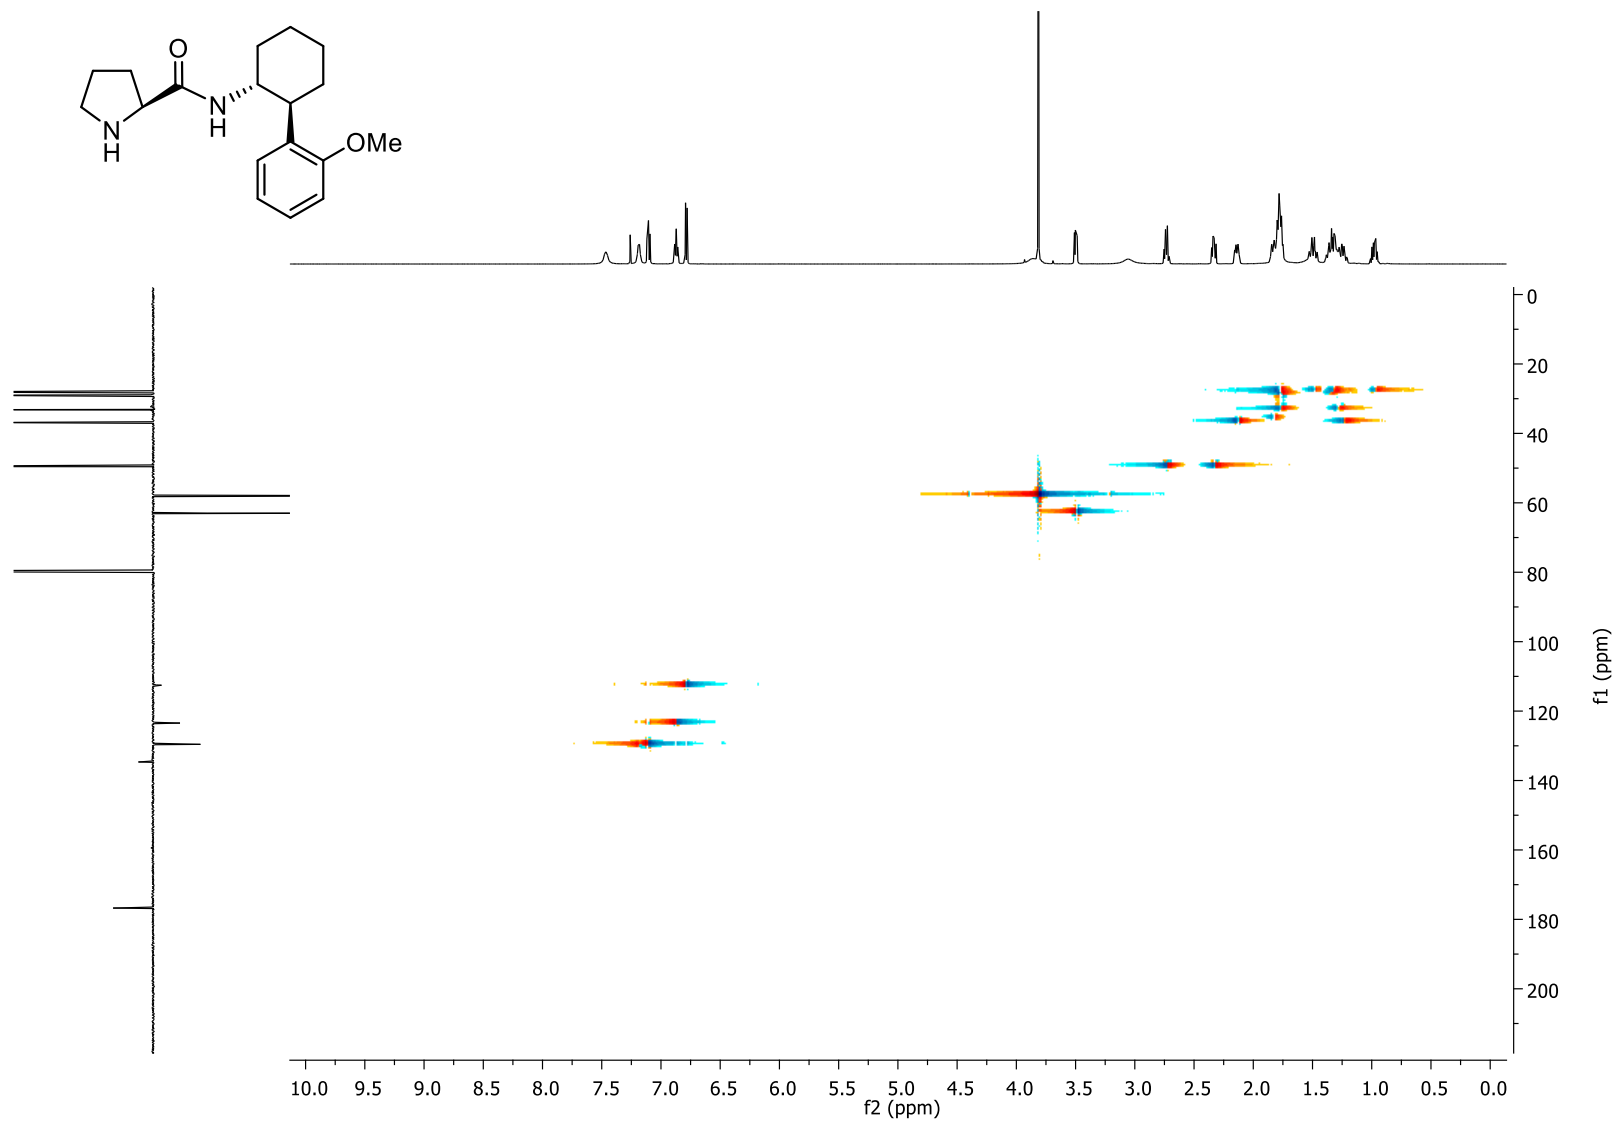

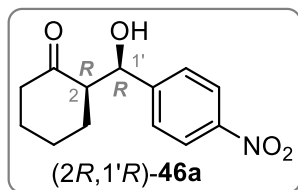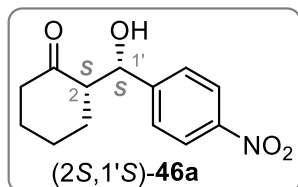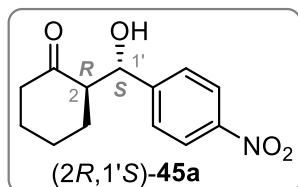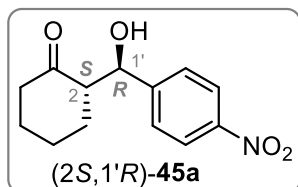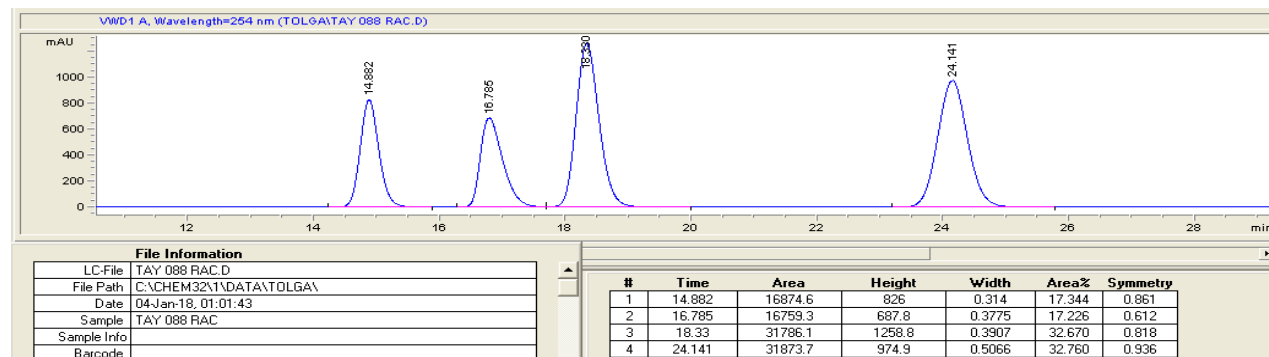

**(±)-45a and (±)-46a**

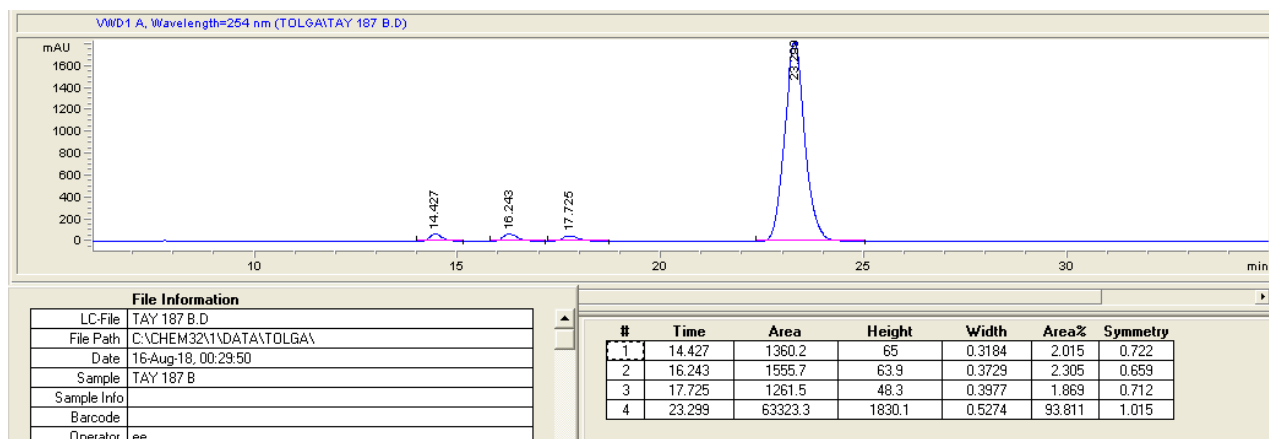

**(2S,1'R)-45a and (2R,1'R)-46a**

**HPLC:** Daicel Chiralpak AD-H (4.60 mm ID × 250 mm column length); *n*-hexane/<sup>i</sup>PrOH (85:15), 1.0 mL/min; 254 nm (UV/Vis);  $t_R$ =14.8 min ((2R,1'R)-46a),  $t_R$ =16.8 min ((2S,1'S)-46a),  $t_R$ =18.3 min ((2R,1'S)-45a),  $t_R$ =24.1 min ((2S,1'R)-45a).

**HPLC Chromatograms of (±)-45a, (±)-46a, and (2S,1'R)-45a**

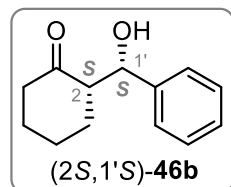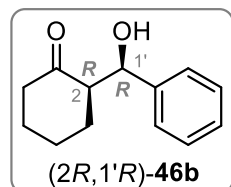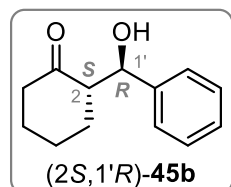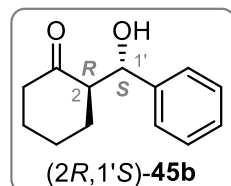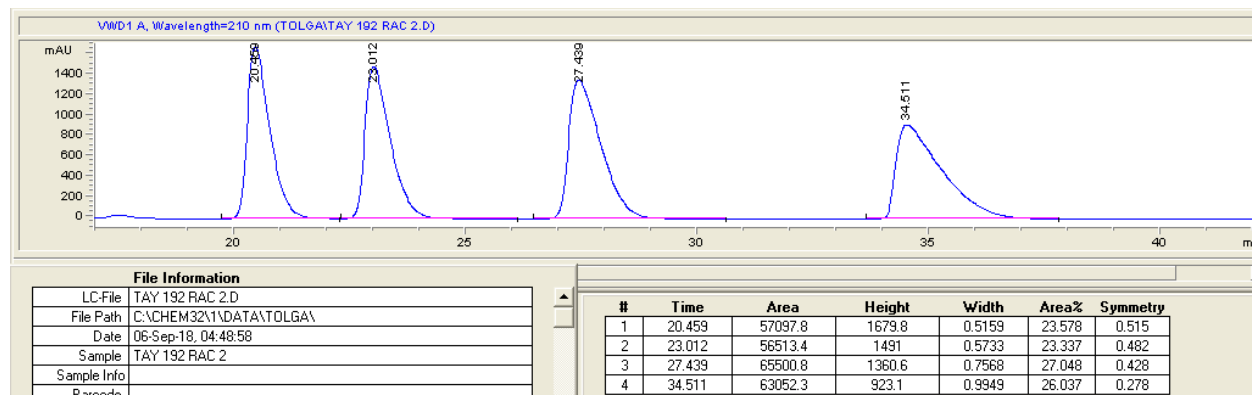

(±)-45b and (±)-46b

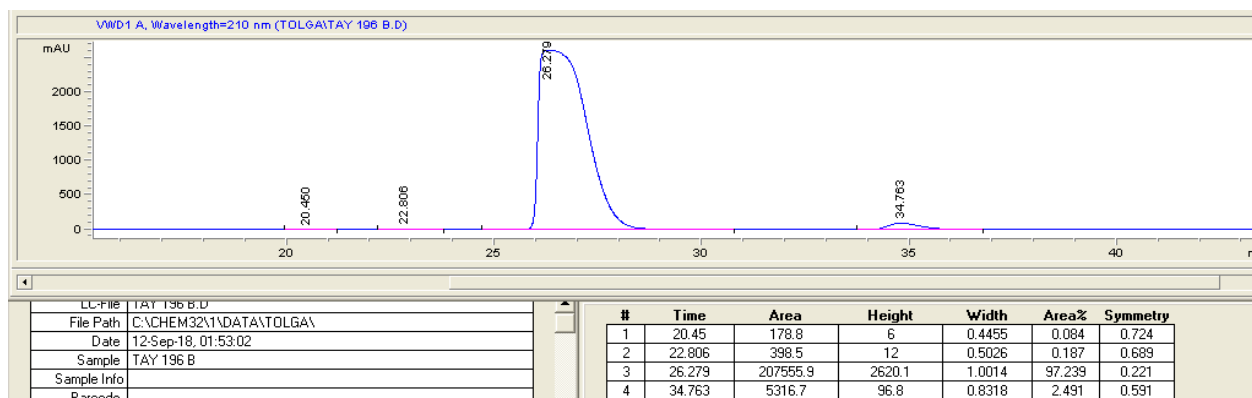

(2S,1'R)-45b and (2R,1'R)-46b

**HPLC:** Daicel Chiralpak OD-H (4.60 mm ID × 250 mm column length); *n*-hexane/*i*PrOH (95:5), 0.5 mL/min; 254 nm (UV/Vis);  $t_R=20.5$  min ((2S,1'S)-46b),  $t_R=23.0$  min ((2R,1'R)-46b),  $t_R=27.4$  min ((2S,1'R)-45b),  $t_R=34.5$  min ((2R,1'S)-45b).

### HPLC Chromatograms of (±)-45b, (±)-46b, and (2S,1'R)-45b



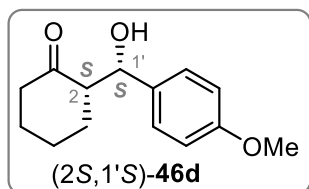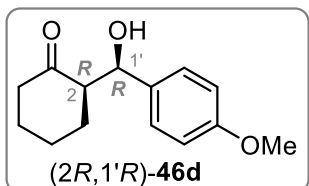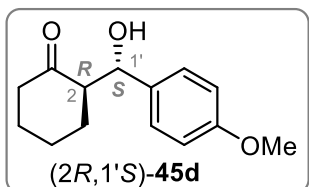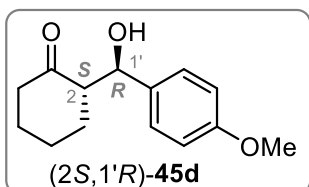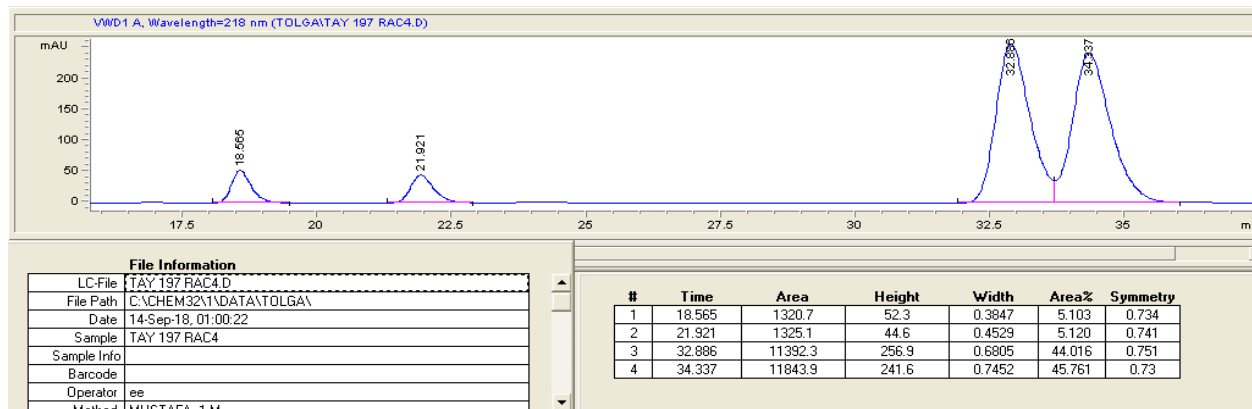

(±)-**45d** and (±)-**46d**

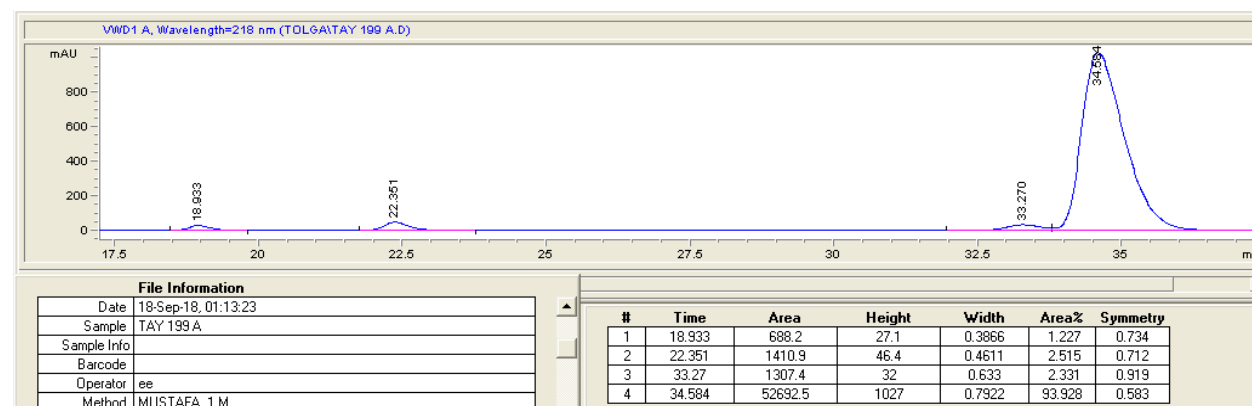

(2*S*,1'*R*)-**45d** and (2*R*,1'*R*)-**46d**

**HPLC:** Daicel Chiralpak AD-H (4.60 mm ID × 250 mm column length); *n*-hexane/*i*PrOH (94:6), 1.0 mL/min; 218 nm (UV/Vis);  $t_R$ =18.6 min ((2*S*,1'*S*)-**46d**),  $t_R$ =21.9 min ((2*R*,1'*R*)-**46d**),  $t_R$ =32.8 min ((2*R*,1'*S*)-**45d**),  $t_R$ =34.3 min ((2*S*,1'*R*)-**45d**).

**HPLC Chromatograms of (±)-45d, (±)-46d, and (2*S*,1'*R*)-45d**

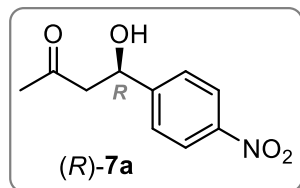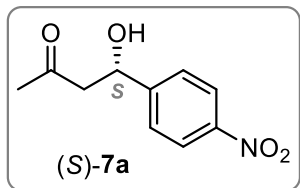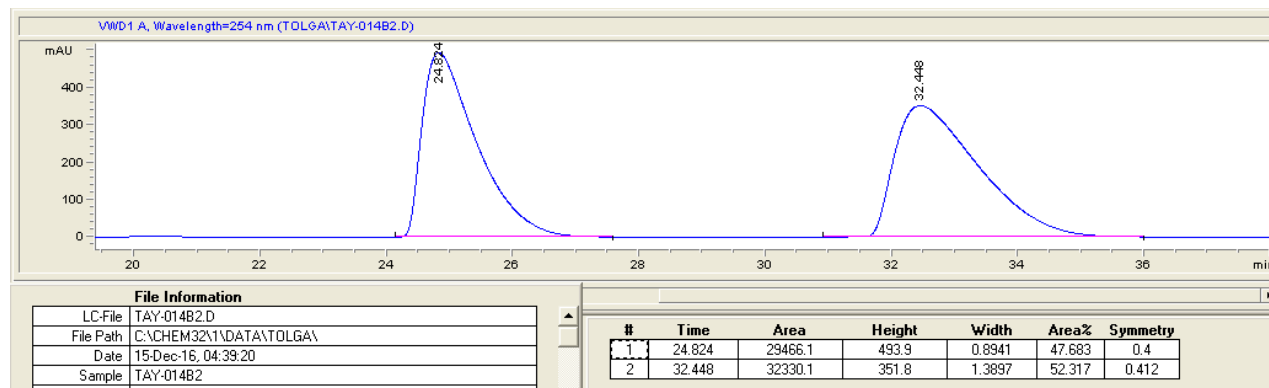

(±)-7a

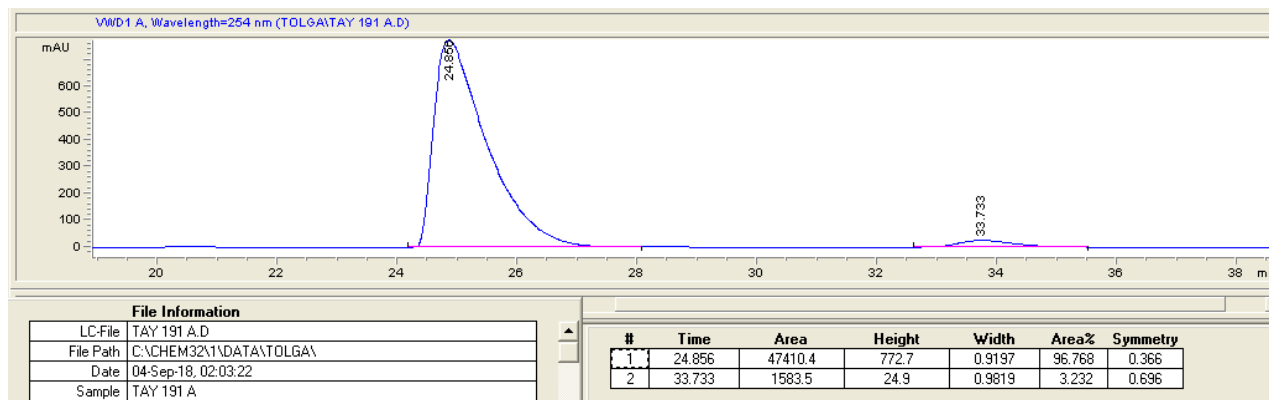

(R)-7a (94% ee)

**HPLC:** Daicel Chiralpak AS-H (4.60 mm ID × 250 mm column length); *n*-hexane/*i*PrOH (85:15), 1.0 mL/min; 254 nm (UV/Vis);  $t_R$ =25.1 min ((R)-7a),  $t_R$ =32.4 min ((S)-7a).

**HPLC Chromatograms of (±)-7a and (R)-7a**

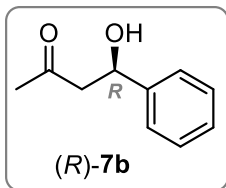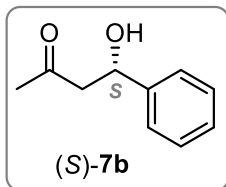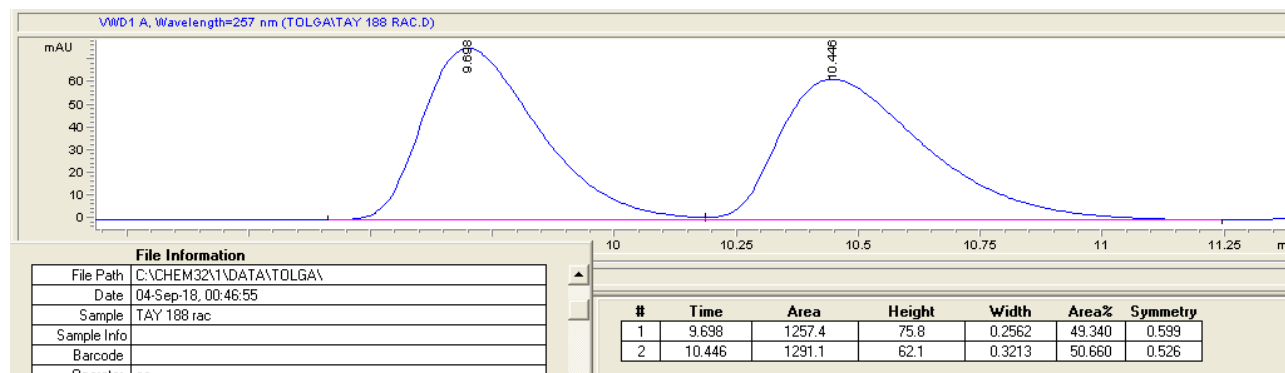

**(±)-7b**

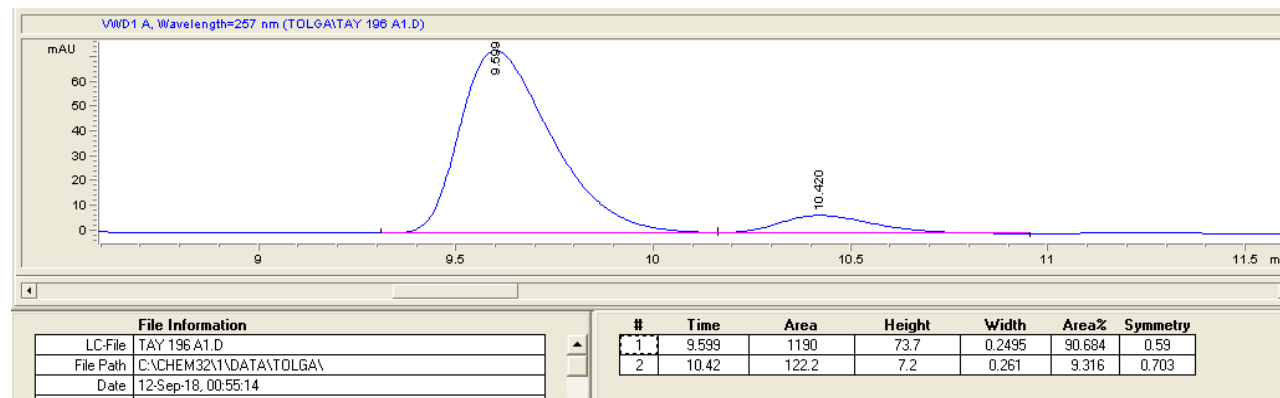

**(R)-7b (81% ee)**

**HPLC:** Daicel Chiralpak AS-H (4.60 mm ID × 250 mm column length); *n*-hexane/*i*PrOH (85:15), 1.0 mL/min; 257 nm (UV/Vis);  $t_R$ =9.7 min ((*R*)-7b),  $t_R$ =10.5 min ((*S*)-7b).

**HPLC Chromatograms of (±)-7b and (R)-7b**

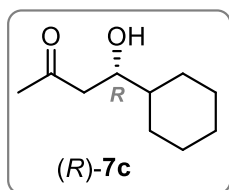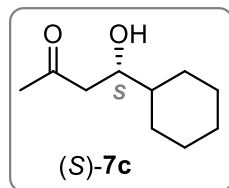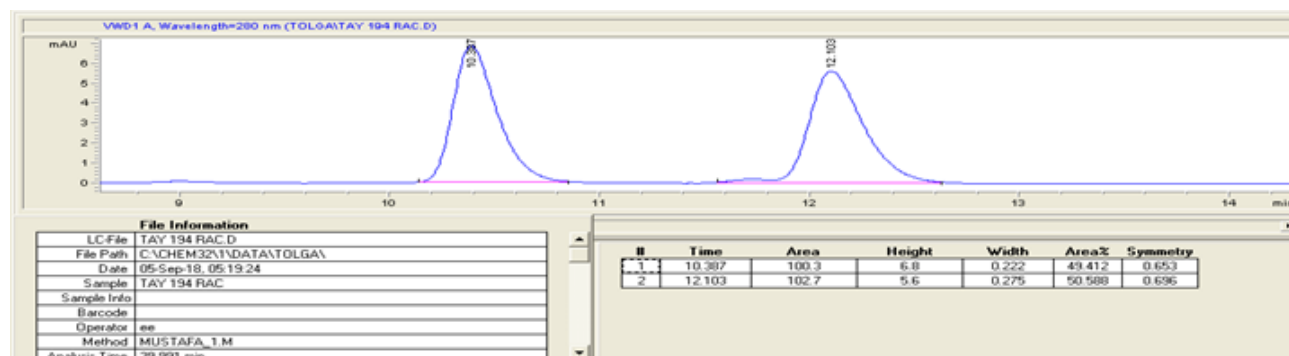

(±)-7c

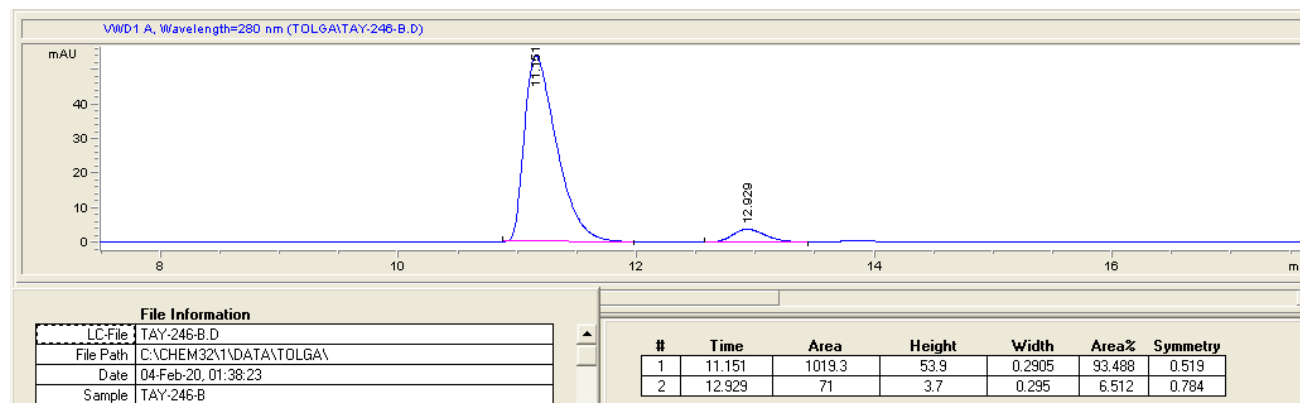

(R)-7c (87% ee)

**HPLC:** Daicel Chiralpak AD-H (4.60 mm ID × 250 mm column length); *n*-hexane/*i*-PrOH (95:5), 1.0 mL/min; 280 nm (UV/Vis);  $t_R$ =10.4 min ((R)-7c),  $t_R$ =12.1 min ((S)-7c).

HPLC Chromatograms of (±)-7c and (R)-7c

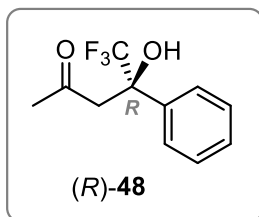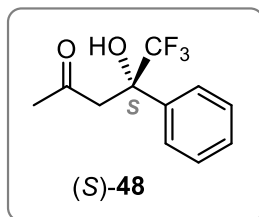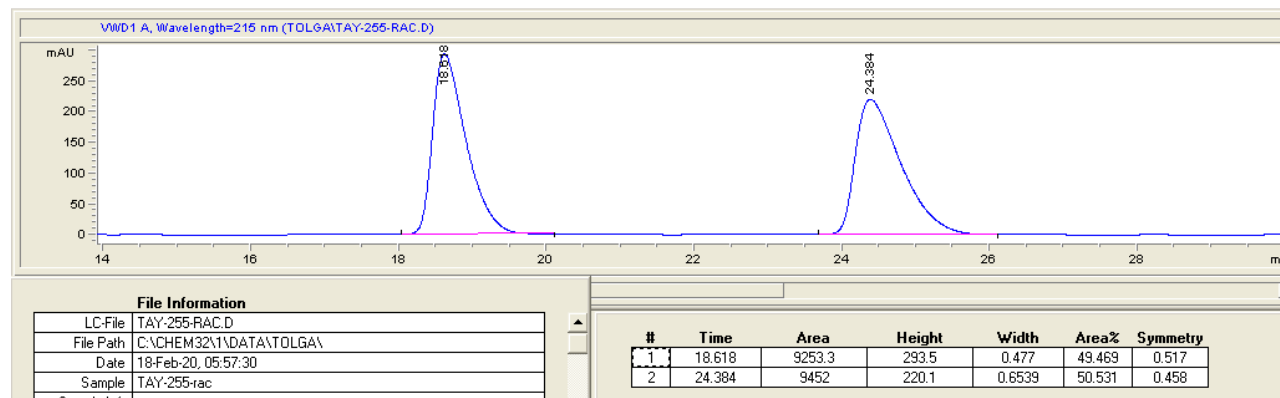

(±)-48

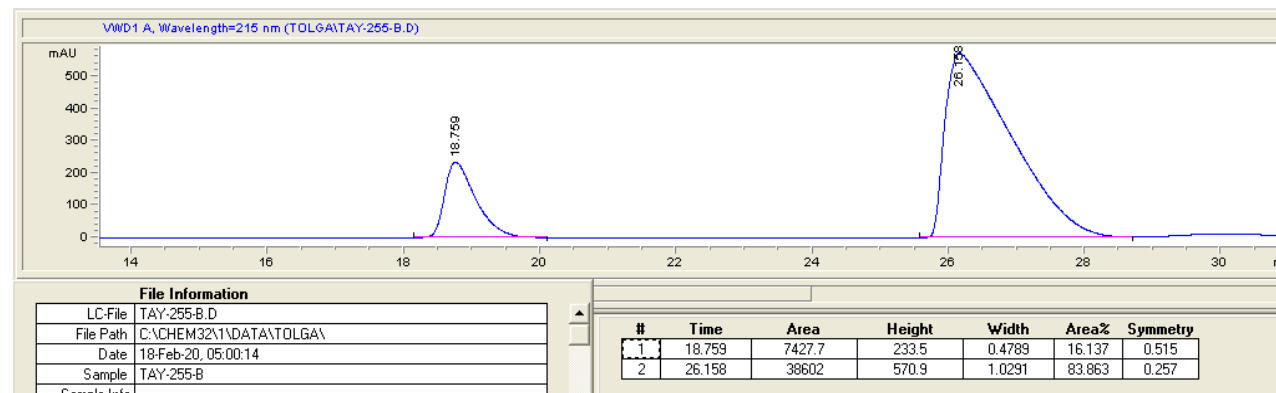

(S)-48 (68% ee)

**HPLC:** Daicel Chiralpak OD-H (4.60 mm ID × 250 mm column length); *n*-hexane/*i*PrOH (99:1), 1.0 mL/min; 215 nm (UV/Vis);  $t_R$ =18.6 min ((R)-48),  $t_R$ =24.4 min ((S)-48).

HPLC Chromatograms of (±)-48 and (S)-48
